# Supplementary material for: A genome-wide survey of DNA methylation in hexaploid wheat
Source: PubMed Central journal article supplement (PMC4674939; doi:10.1186/s13059-015-0838-3), 2015-12-10
Supplement: 13059_2015_838_MOESM1_ESM.pdf [file 13059_2015_838_MOESM1_ESM.pdf]

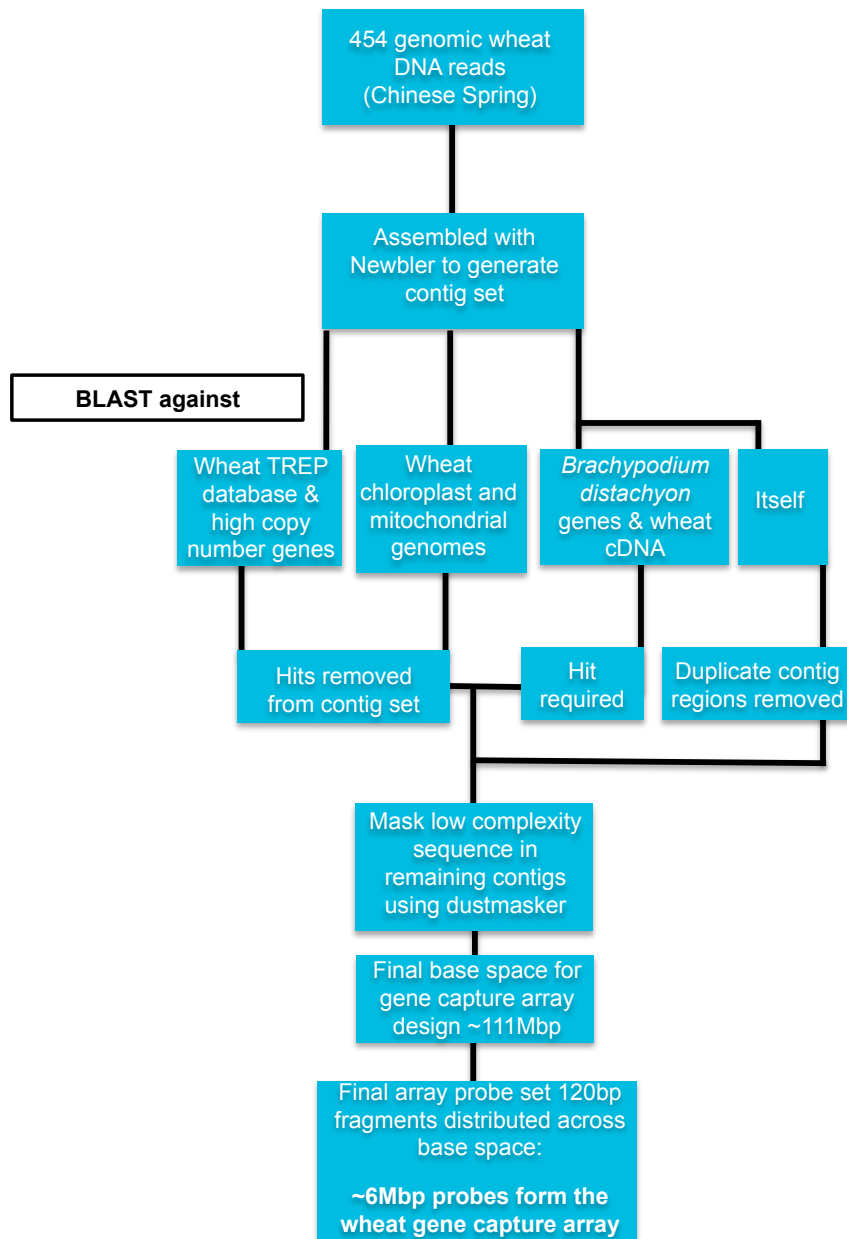

**Figure 1. Design of the wheat gene capture array** Sequencing reads were assembled into contigs using the software Newbler, contigs were selected that hit genes in the closely related species *Brachypodium distachyon* and that hit the wheat cDNA sequence when BLASTN<sup>1</sup> searches were conducted. These contigs were then processed to eliminate redundancy, chloroplast and mitochondrial sequence and repetitive sequence (TREP database). The remaining contigs were filtered for regions of low complexity and used as the design target sequence for the array (~111Mbp). The RNA baits for this SureSelect Methyl-Seq Target Enrichment system are all 120bp in length, unique, non-repetitive and are evenly placed across the available wheat genic target sequence.

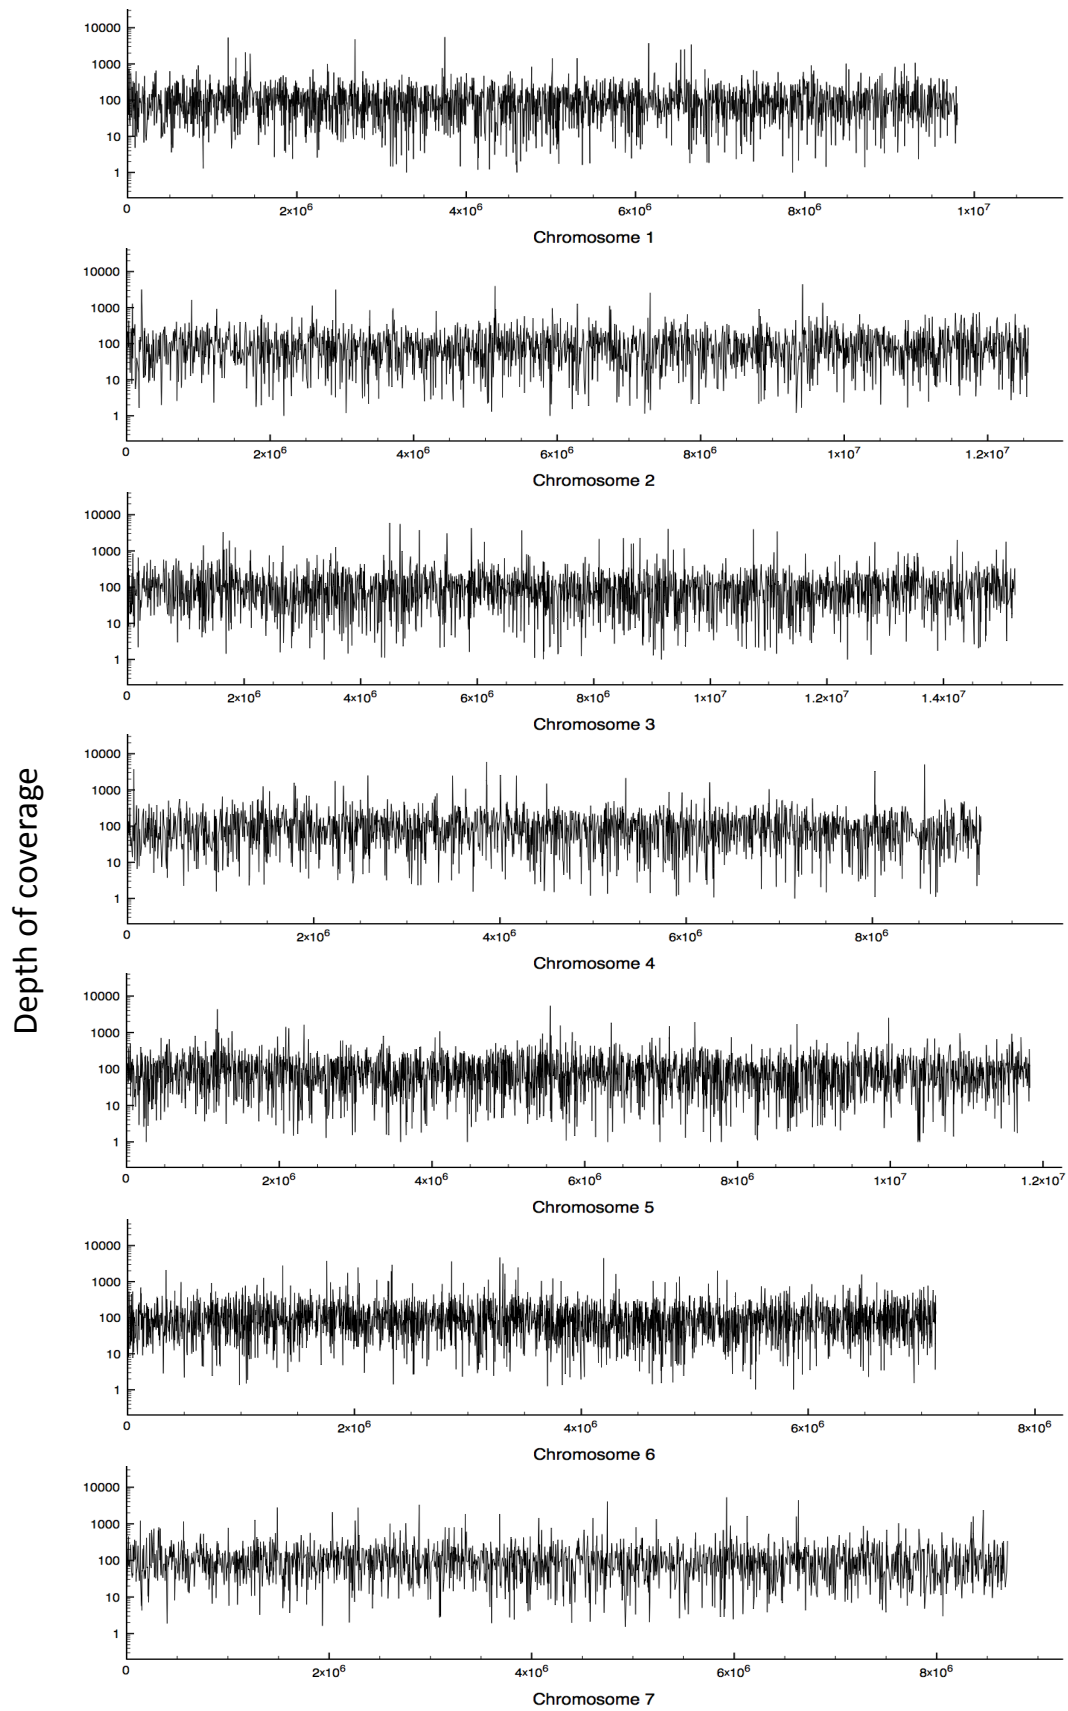

**Figure 2.** Average depth of coverage per bait probe plotted for the 12°C sample. Coverage plotted along each pseudo-chromosome construct after ordering and concatenation of extended capture array bait sequences (see methods).

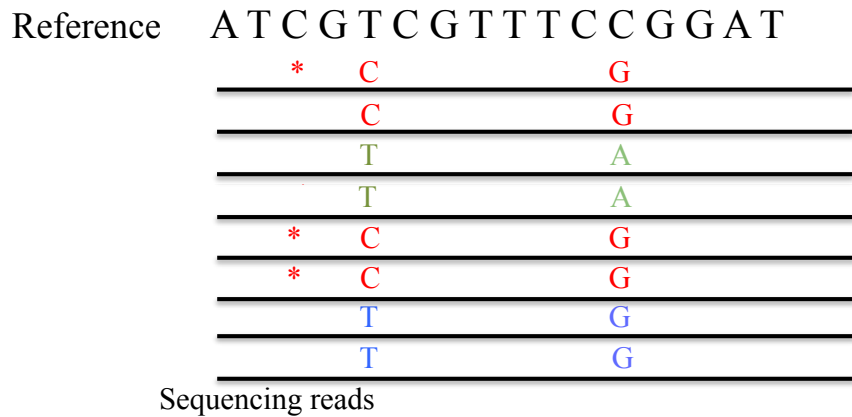

Methylation \*

|                 |                          |
|-----------------|--------------------------|
| Genome A allele | Genome A 100% methylated |
| Genome B allele | Genome B un-methylated   |
| Genome D allele | Genome D un-methylated   |

**Figure 3. Association of methylation sites with the 3 wheat sub-genomes.** Illustrating the use of association of two bi-allelic homoeologous SNPs: one C->T discriminating genome A from B and D and another A->G discriminating genome B from A and D. This ultimately allows discrimination of all three sub-genomes due to their combination of SNP alleles. Here a methylation site is shown within the same sequencing read on sub-genome A to outline the determination of its genome of origin.

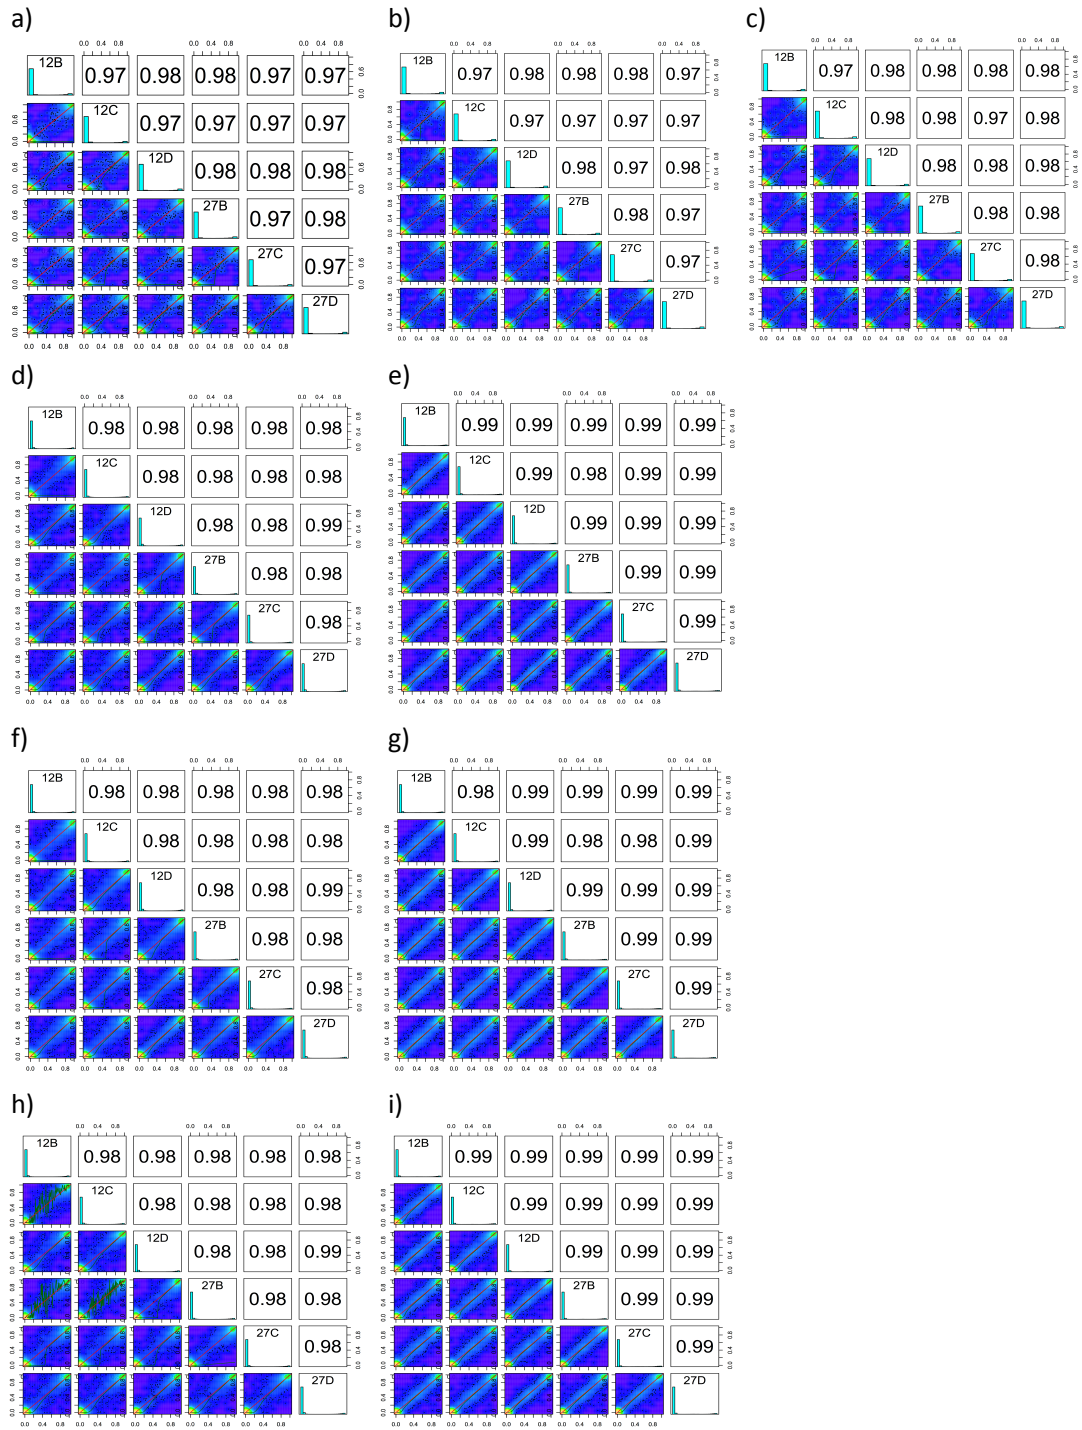

**Figure 4. MethylKit<sup>2</sup> Pearson correlation coefficient computations to compare methylation across the three replicates (B, C and D) of the 12°C sample and the 27°C sample.** Figures demonstrate comparisons of methylation levels across the respective samples at positions that have information that is associated with the a) A sub-genome, b) B sub-genome and the c) D sub genome directly. Where bi-allelic homoeologous SNPs have been used to assign methylation levels, at a position, to one genome or the other two the following is shown; information associated with d) A sub-genome and e) BD sub-genomes or f) B sub-genome and g) AD sub-genomes or h) D sub-genome and i) AB sub-genomes.

Sample 12: Validation of SNP and methylation sites in CONTIG318298\_1-1640-953 between positions 951 and 1190

SNP position 1073  
In NGS see; G:64% A:36%  
We see here; ~100% G

SNP position 1049  
In NGS see; ~100% T  
We see here; ~100% T ✓

SNP position 982  
In NGS see; G:83% A:17%  
We see here; ~98% G negligible 1-2% A ✓

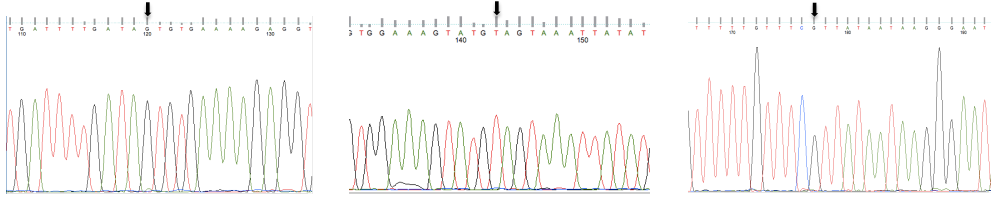

Sample 27: Validation of SNP and methylation sites in CONTIG318298\_1-1640-953 between positions 951 and 1190

SNP position 1073  
In NGS see; G:65% A:35%  
We see here; ~90% G ~10% A

SNP position 1049  
In NGS see; ~100% T  
We see here; ~100% T ✓

SNP position 982  
In NGS see; G:82% A:18%  
We see here; ~98% G negligible 1-2% A ✓

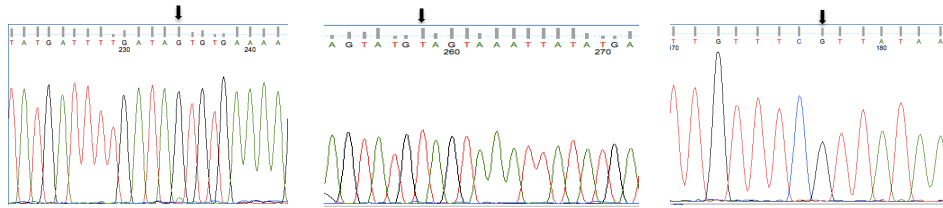

Sample 12: Validation of SNP and methylation sites in CONTIG44098\_1040-2994-1412 between positions 1374 and 1684

SNP position 1420  
In NGS see; T:70% C:30%  
See here; T ~50% C ~50% ✓

SNP position 1528  
In NGS see; C:57% T:43%  
See here; C ~ 50% T ~ 50% ✓

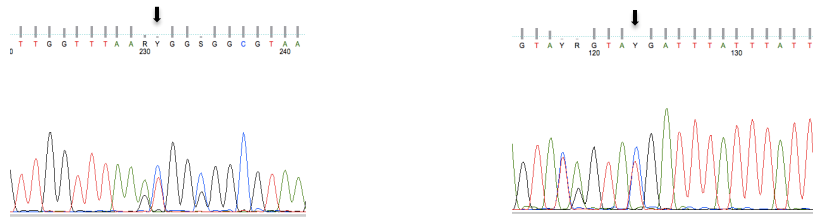

Sample 27: Validation of SNP and methylation sites in CONTIG44098\_1040-2994-1412 between positions 1374 and 1684

SNP position 1420  
In NGS see; T:82% C:18%  
See here; T ~50% C ~50%

SNP position 1528  
In NGS see; C:61% T:39%  
See here; C ~ 50% T ~ 40% ✓

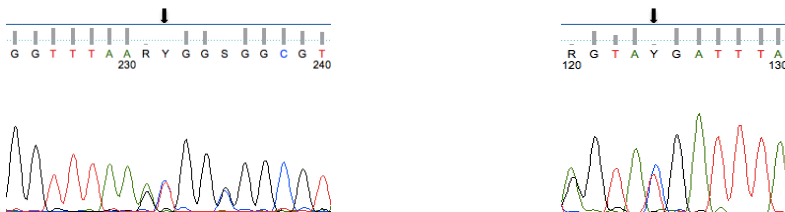

Sample 12: Validation of SNP and methylation sites in CONTIG248041\_1-1793-1442 between positions 1387 and 1525

SNP position 1524  
In NGS see; T:100%  
We see here; ~100% T ✓

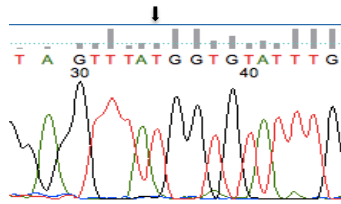

SNP position 1466  
In NGS see; T:100%  
We see here; ~100% T ✓

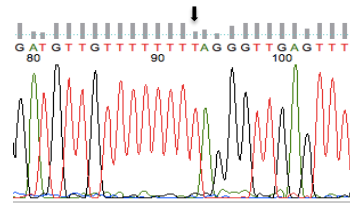

Sample 27: Validation of SNP and methylation sites in CONTIG248041\_1-1793-1442 between positions 1387 and 1525

SNP position 1524  
In NGS see; T:100%  
We see here; ~100% T ✓

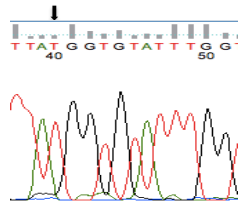

SNP position 1466  
In NGS see; T:99% C:1%  
We see here; ~100% T ✓

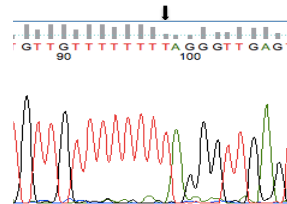

Sample 12: Validation of SNP and methylation sites in CONTIG174481\_1-2021-596 between positions 668 and 887

SNP position 681  
In NGS see; 92% T 8% A  
We see here; ~100% T ✓

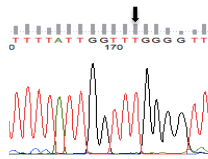

SNP position 716  
In NGS see; 91% A 9% T  
We see here; ~99% A ~1% T ✓

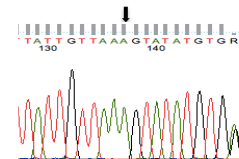

Sample 27: Validation of SNP and methylation sites in CONTIG174481\_1-2021-596 between positions 668 and 887

SNP position 681  
In NGS see; 92% T 8% A  
We see here; ~100% T ✓

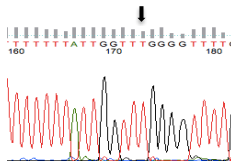

SNP position 716  
In NGS see; 91% A 9% T  
We see here; ~98% A ~2% T ✓

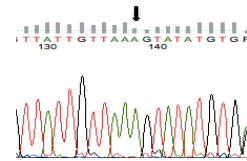

Sample 12: Validation of SNP and methylation sites in CONTIG381103\_1-1538-1308 between positions 1145 and 1290

SNP position 1195  
In NGS see; 83% A 17% T  
We see here; ~80% A ~20% T ✓

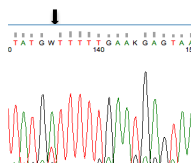

SNP position 1259  
In NGS see; 46% T 54% C  
We see here; ~50% T ~50% C ✓

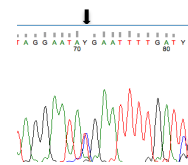

Sample 27: Validation of SNP and methylation sites in CONTIG381103\_1-1538-1308 between positions 1145 and 1290

SNP position 1195  
In NGS see; 66% A 34% T  
We see here; ~70%A % ~30%T ✓

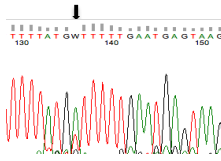

SNP position 1259  
In NGS see; 42% T 58% C  
We see here; ~50% T ~50% C ✓

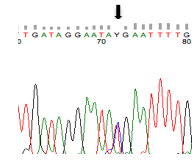

Sample 12: Validation of SNP and methylation sites in CONTIG256716\_1-1768-36 between positions 79 and 423

SNP position 102  
In NGS see; 29% A 71% G  
We see here; ~30%A % ~70%G ✓

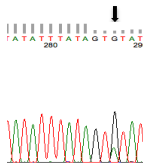

SNP position 125  
In NGS see; 100% A  
We see here; ~100% A ✓

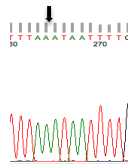

SNP position 139  
In NGS see; 100% A  
We see here; ~100% A ✓

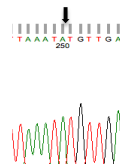

SNP position 215  
In NGS see; 100% A  
We see here; ~100% A ✓

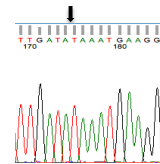

SNP position 306  
In NGS see; 33% G 67% A  
We see here; ~70% A ~30% G ✓

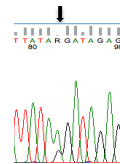

Sample 27: Validation of SNP and methylation sites in CONTIG256716\_1-1768-36 between positions 79 and 423

SNP position 102  
In NGS see; 29% A 71% G  
We see here; ~30%A % ~70%G ✓

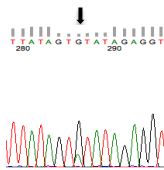

SNP position 125  
In NGS see; 100% A  
We see here; ~100% A ✓

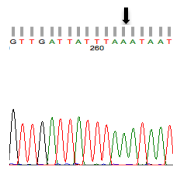

SNP position 139  
In NGS see; 100% A  
We see here; ~100% A ✓

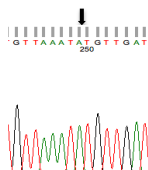

SNP position 215  
In NGS see; 100% A  
We see here; ~100% A ✓

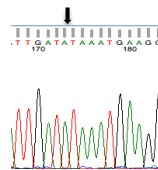

SNP position 306  
In NGS see; 33% G 67% A  
We see here; ~70% A ~30% G ✓

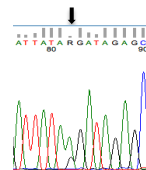

Sample 12: Validation of SNP and methylation sites in CONTIG1173474\_1-941-195 between positions 217 and 503

SNP position 315  
In NGS see; 69% A 31% T  
We see here; ~100%A

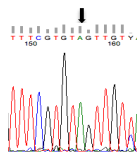

SNP position 275  
In NGS see; 28% T 72% A  
We see here; ~95% A ~5% T

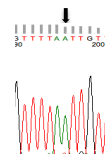

Sample 27: Validation of SNP and methylation sites in CONTIG1173474\_1-941-195 between positions 217 and 503

SNP position 315  
In NGS see; 69% A 31% T  
Expect; ~69% A ~31%T  
We see here; ~100%A

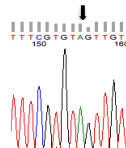

SNP position 275  
In NGS see; 29% T 71% A  
Expect; 29-0%G; 71-100% A;  
We see here; ~95% A ~5% T

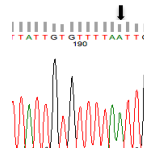

Sample 12: Validation of SNP and methylation sites in CONTIG796042\_275-1136-650 between positions 436 and 806

SNP position 686  
In NGS see; 25% A 75% T  
We see here; ~95%T ~5% A (consistent C noise) ✓

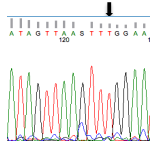

Sample 27: Validation of SNP and methylation sites in CONTIG796042\_275-1136-650 between positions 436 and 806

SNP position 686  
In NGS see; 36% A 64% T  
We see here; ~90%T ~10% A (consistent C noise)

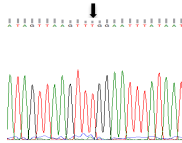

Sample 12: Validation of SNP and methylation sites in CONTIG462845\_1-1429-894 between positions 893 and 1115

SNP position 930  
In NGS see; 57% T 43% C  
We see here; ~60%T ~40% C ✓

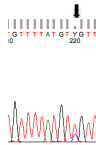

SNP position 1014  
In NGS see; 33% T 67% A  
We see here; ~70% A ~30% T ✓

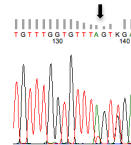

Sample 27: Validation of SNP and methylation sites in CONTIG462845\_1-1429-894 between positions 893 and 1115

SNP position 930  
In NGS see; 51% T 49% C  
We see here; ~53%T ~47% C ✓

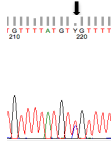

SNP position 1014  
In NGS see; 30% T 70% A  
We see here; ~70% A ~30% T ✓

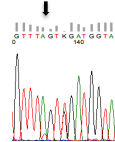



Sample 12: Validation of SNP and methylation sites in CONTIG643204\_1-1170-857 between positions 678 and 761

SNP position 762

In NGS see; 69% A 31% G

We see here; ~50%A ~50% G ✓

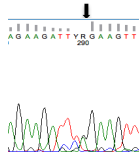

SNP position 715

In NGS see; 100% A

We see here; ~100% A ✓

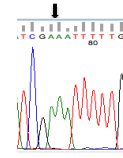

Sample 27: Validation of SNP and methylation sites in CONTIG643204\_1-1170-857 between positions 678 and 761

SNP position 762

In NGS see; 57% A 43% G

We see here; ~50%A ~50% G ✓

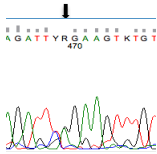

SNP position 715

In NGS see; 100% A

We see here; ~100% A ✓

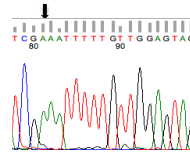

**Figure 5. Sanger sequencing output traces.** Raw Sanger sequencing outputs generated from bisulfite treated DNA for 23 SNPs in each of sample 12 and 27. SNPs were originally identified in the next generation sequencing data that was derived from enriched bisulfite treated DNA and sites extend across 10 of the methylation array extended bait probe sequences. This data outlines the validation of these SNP calls.

| Stage                                                        | Feature                                                                   | Proportion Transcribed (intron/exon) |
|--------------------------------------------------------------|---------------------------------------------------------------------------|--------------------------------------|
| Stage 1<br>Reference & SNP list                              | Reference sequence 44Mb                                                   | 55%                                  |
|                                                              | 72,345 Homeologous SNPs                                                   | 78%                                  |
| Stage 2<br>Within mapped sequencing data                     | 7,813,105 cytosine residues (8,069,906)                                   | 51% (51%)                            |
|                                                              | 33,650 Homeologous SNPs (33,912)                                          | 79% (79%)                            |
| Stage 3<br>Associated data                                   | 1,001,620 cytosine residues associated with a homeologous SNP (1,018,531) | 78% (78%)                            |
| Stage 4<br>Final dataset:<br>3 sub-genomes mapped 5x or more | 318,452 cytosine residues (324,227)                                       | 80% (80%)                            |
|                                                              | 28,632 with SNPs for A, B and D sub-genome (29,202)                       | 85% (85%)                            |
|                                                              | 289,820 with SNPs for A/BD, B/AD or D/AB (295,025)                        | 80% (80%)                            |

**Figure 6. Determination of the subset of data that was available for detailed analysis in the 12°C sample.** Corresponding numbers in the 27°C sample shown in brackets. At each stage the percentages of sites that are transcribed/non-transcribed are detailed. **Stage 1** describes the mapping reference and the reference homeologous SNP list. **Stage 2** Shows all cytosine residues and reference homeologous SNP positions within the mapped 12°C and 27°C sample datasets. To assign a cytosine residue to the A, B or D wheat sub-genome an individual sequencing read must contain the cytosine residue plus a homeologous SNP allele; In **Stage 3** the outputs from **stage 2** are combined to identify all cytosines that could be associated with homeologous SNP locations in each of the datasets. **Stage 4** outlines the final analyzable dataset; cytosine residues were selected if all three genomes could each be identified at a depth of 5X or more in the mapped reads.

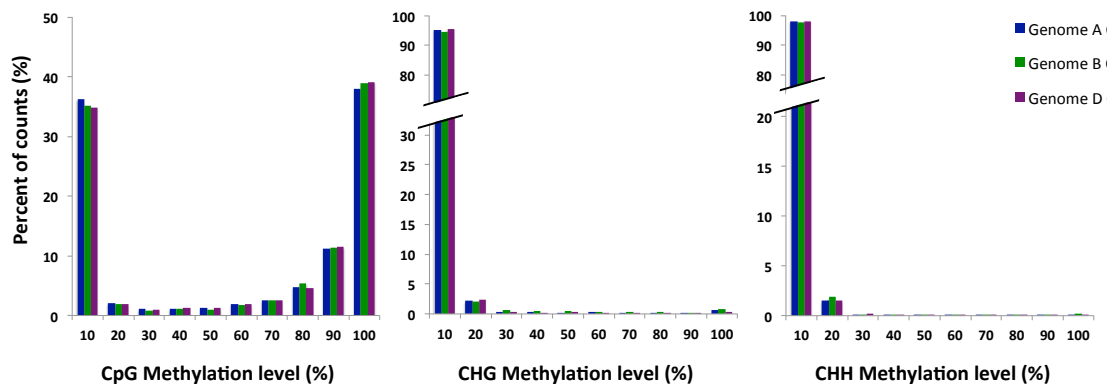

**Figure 7. General patterns of methylation in the Wheat genome. a-c,** Distribution of methylation percentage of (a) CpG, (b) CHG, and (c) CHH sites across the A, B and D sub-genomes of wheat. The x-axis is divided into 10 individual bins that correspond to methylation levels. The y-axis is the percentage of total counts for each respective bin. Here sequencing reads are only utilized if a SNP allele can assign them to a single genome only and at a minimum depth of 5X.

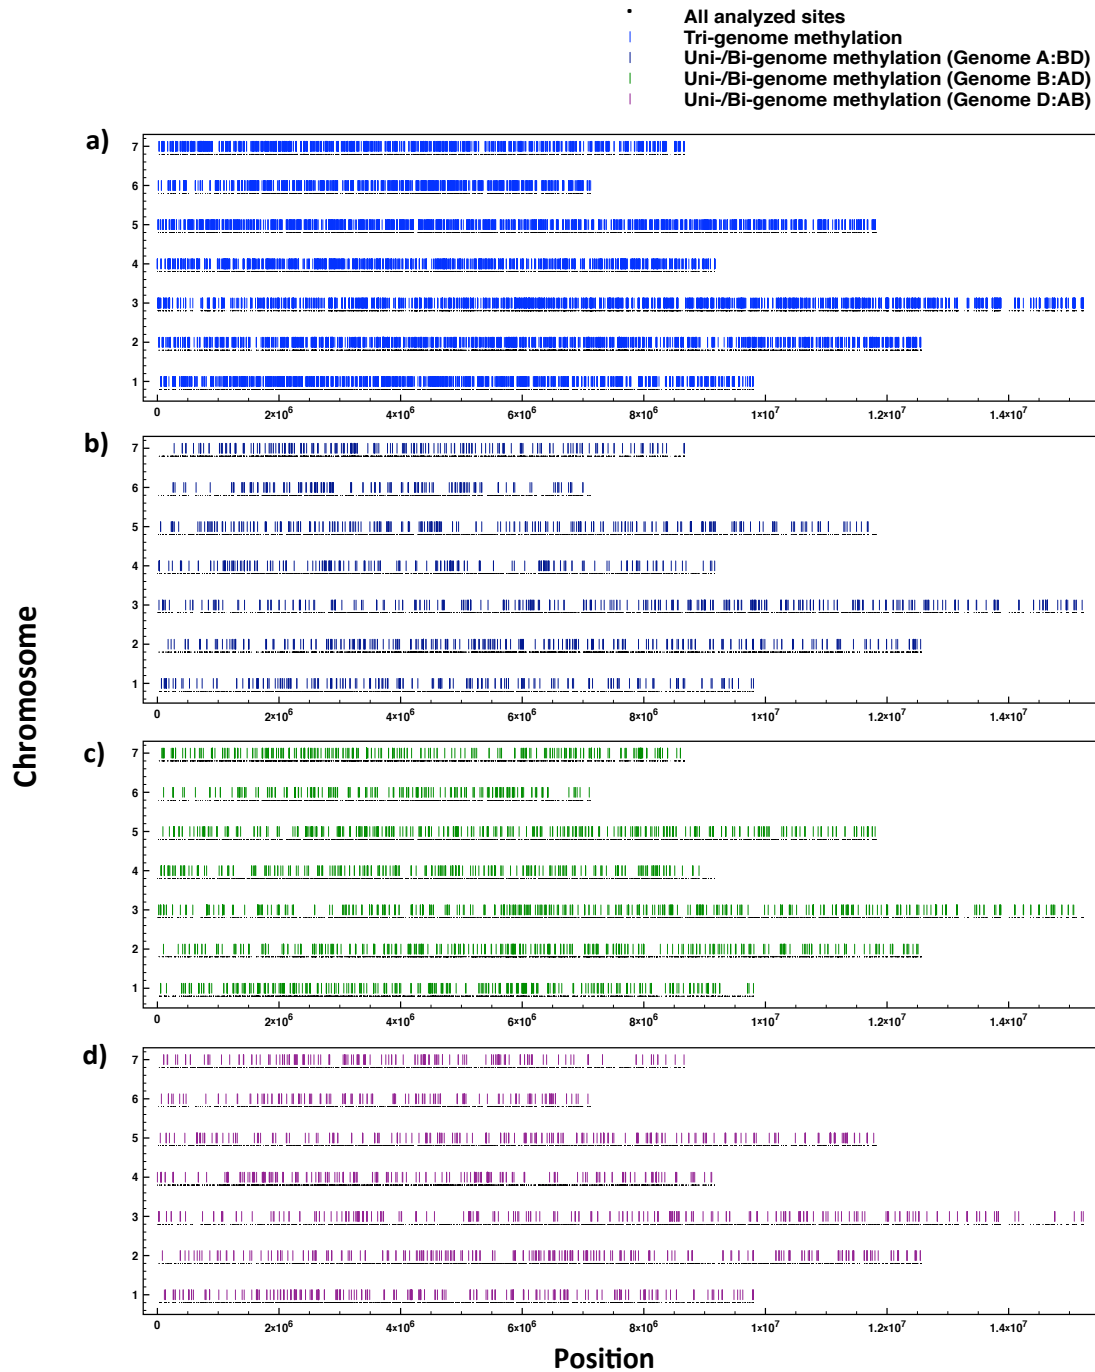

**Figure 8. Positional information for methylation sites.** Incidences of **a)** tri-genome methylation and uni-/bi-genome methylation in **b)** genome A/BD, **c)** genome B/AD and **d)** genome D/AB in the 27°C sample are detailed relative to all analyzed sites (methylated and non-methylated). Data is shown along each of the pseudo-chromosomes and methylation is classified using threshold values plus a 50% difference and  $q < 0.01$  for sites showing differential methylation between the sub-genomes.

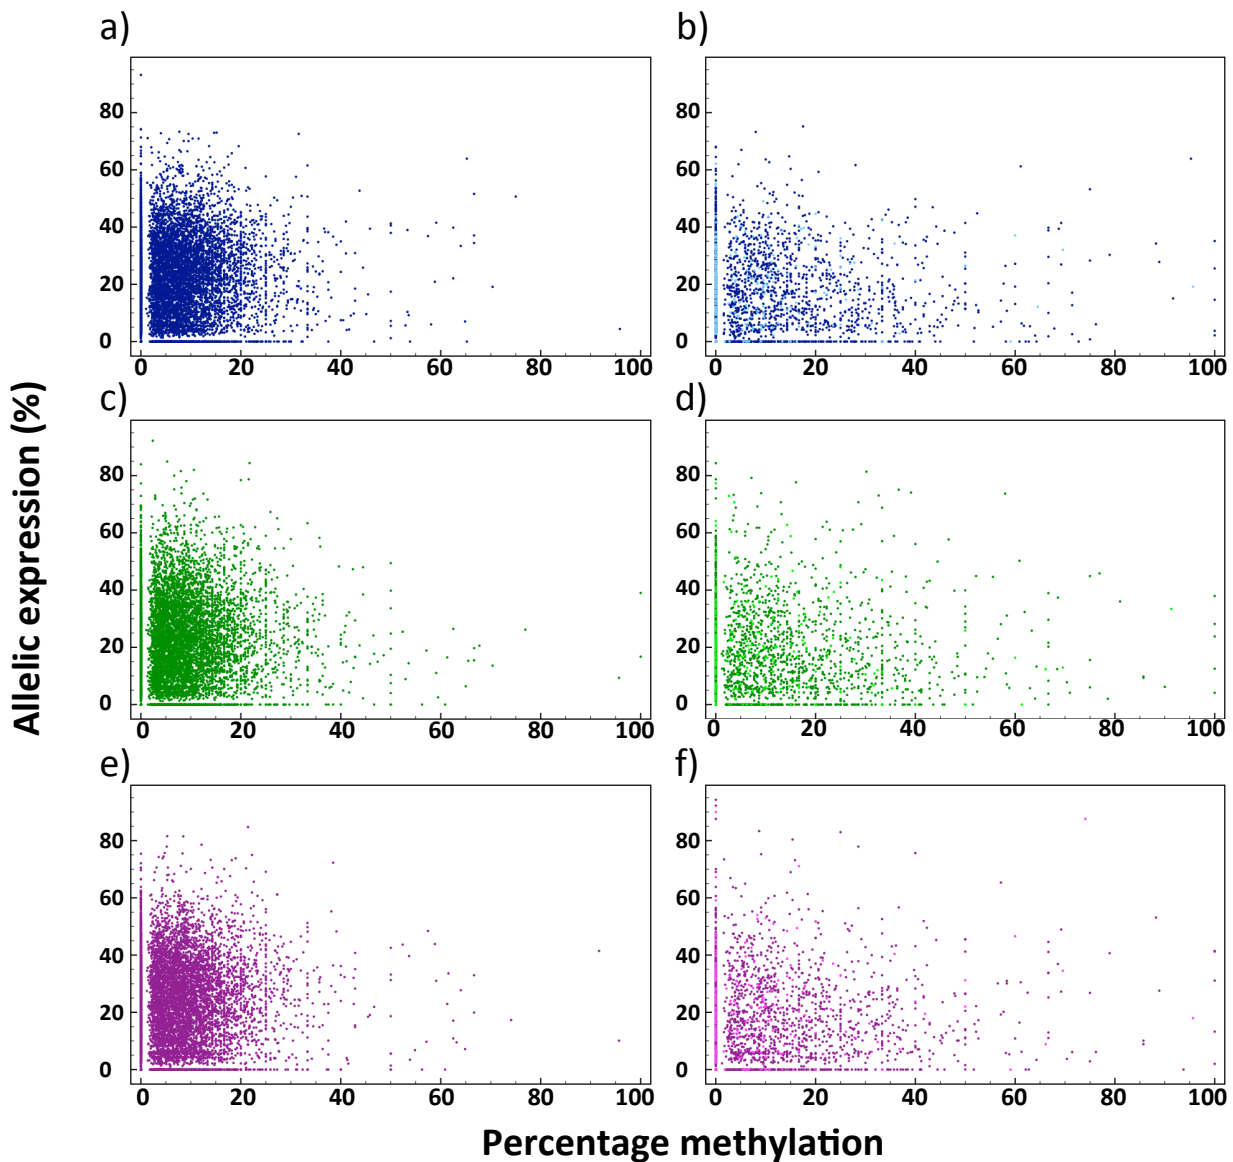

**Figure 9. Association of methylated regions and gene expression.** Percentage methylation per extended bait probe sequence versus percentage allelic gene expression for that sequence summarized for: a) b) sub-genome A, c) d) sub-genome B and e) f) sub-genome D. Data segregated according to transcription status: a) c) e) transcribed intron and exon regions and b) d) f) promoter regions (light colour) and remaining non-transcribed regions (dark colour). Percentage methylation per region (after division into exon/intron versus non-transcribed/promoter) calculated as the number of methylated cytosine residues (using standard thresholds) as a proportion of all cytosine residues in that gene region.

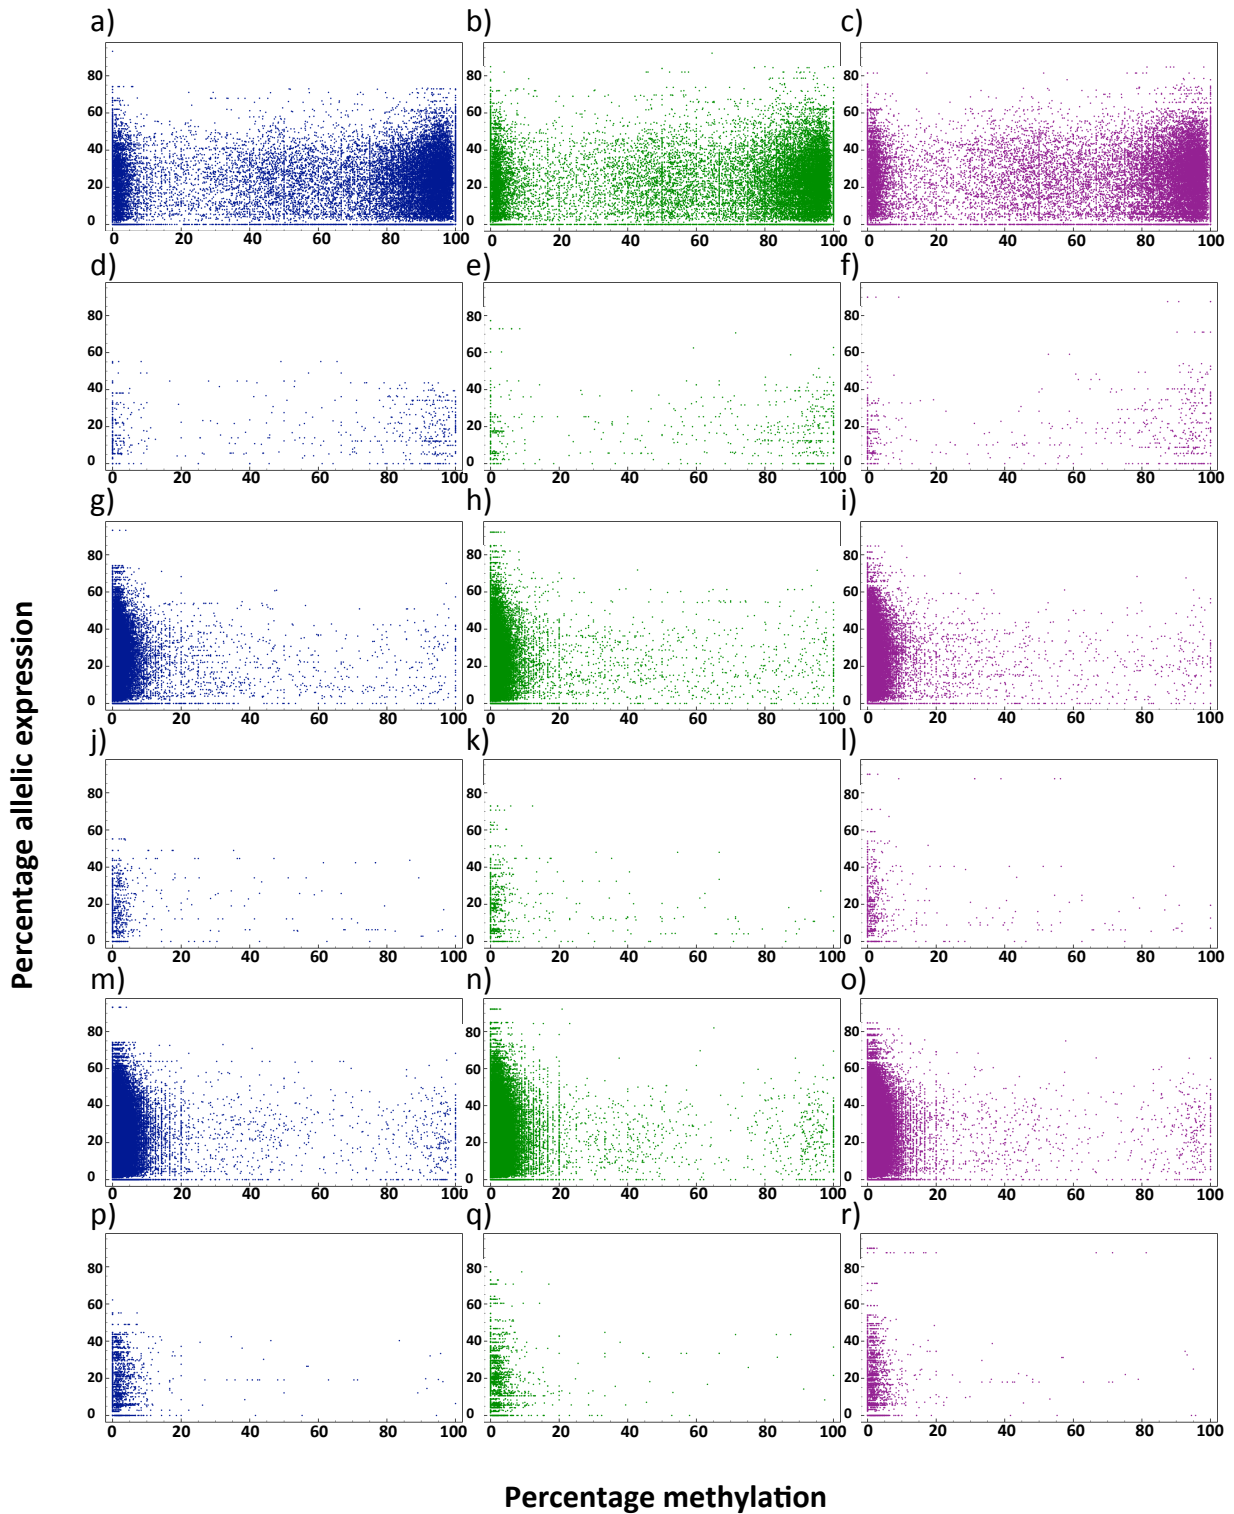

**Figure 10. Association of single point methylation and gene expression.** Percentage methylation at a single cytosine position versus percentage allelic gene expression for the extended bait sequence that the site originated from summarized for: a) d) g) j) m) p) sub-genome A, b) e) h) k) n) q) sub-genome B and c) f) i) l) o) r) sub-genome D. Data segregated according to transcription status: a) b) c) g) h) i) m) n) o) transcribed intron and exon regions and d) e) f) j) k) l) p) q) r) promoter regions. Data was further segregated by cytosine context: a-f) CpG context, g-l) CHG context and m-r) CHH context.

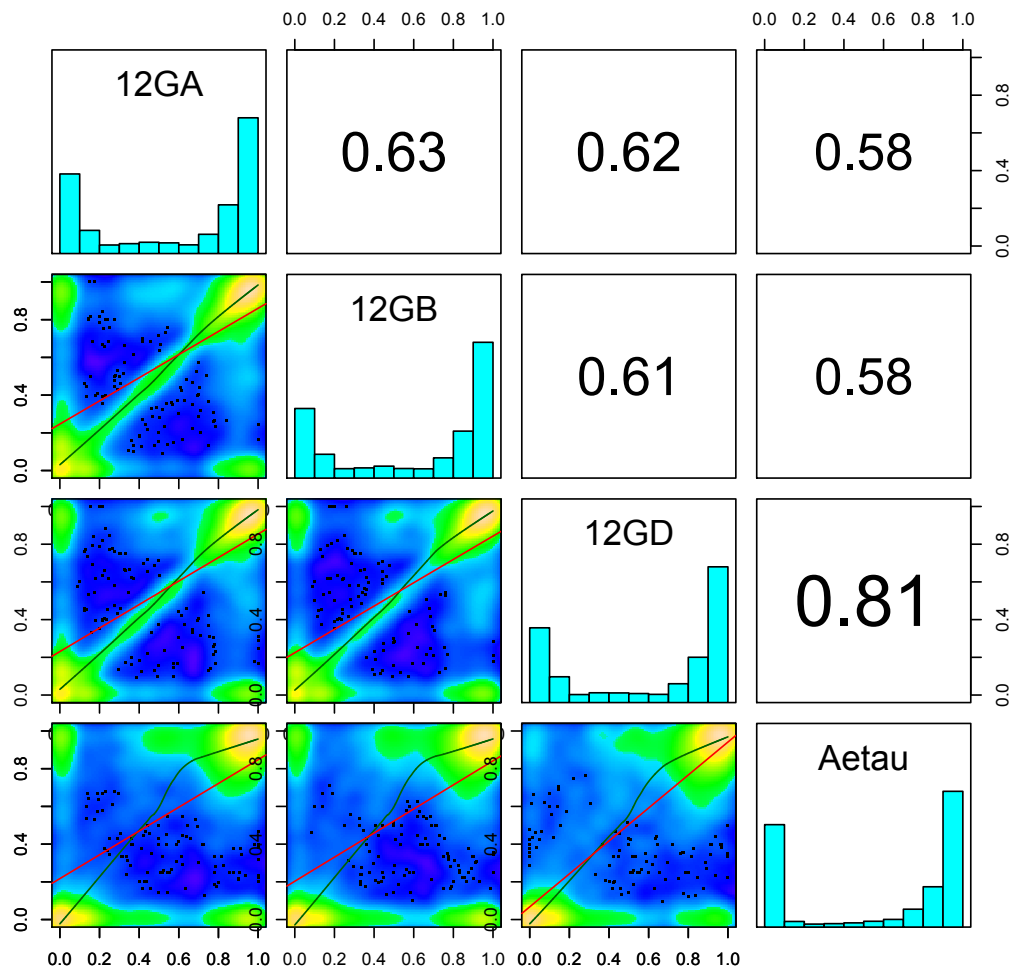

**Figure 11. MethylationKit<sup>2</sup> Pearson correlation coefficient computations to compare methylation between the sub-genome A, B and D of the 12°C sample and the D sub-genome progenitor *Ae. tauschii*.** Figures demonstrate comparisons of methylation levels across the respective samples at positions that have information that is associated with the A sub-genome (12GA), the B sub-genome (12GB) and the D sub genome (12GD) of the 12°C sample and *Ae. Tauschii* (Aetau). Plots are opposite their respective correlation coefficients using a labeled horizontal axis and the intersection of two labels denotes their associated plots. Only cytosine positions where methylation been observed in 1 or more sub-genome of wheat and/or in *Ae. Tauschii* are compared. Where bi-allelic homoeologous SNPs have been used to assign methylation levels, information associated with two genomes will be shown in both plots.

| Sample | Mean % coverage per 120-Mer probe | Mean depth of coverage per 120-Mer probe | Number of Probes mapped (50000 total) | % of reference 120-Mer probes mapped | Number of SNPs identified* (44Mb reference) |
|--------|-----------------------------------|------------------------------------------|---------------------------------------|--------------------------------------|---------------------------------------------|
| 12B    | 97.2                              | 89.8                                     | 49838                                 | 99                                   | 2,720,229                                   |
| 12C    | 96.9                              | 70.4                                     | 49692                                 | 99                                   | 2,503,835                                   |
| 12D    | 97.9                              | 138.5                                    | 49928                                 | 99                                   | 3,381,128                                   |
| 27B    | 97.1                              | 80.9                                     | 49798                                 | 99                                   | 2,758,078                                   |
| 27C    | 97.2                              | 96.3                                     | 49807                                 | 99                                   | 2,836,307                                   |
| 27D    | 97.9                              | 135.8                                    | 49917                                 | 99                                   | 3,320,338                                   |

**Table 1. Mapping Statistics for six enriched and bisulfite treated wheat DNA samples.** All mapping statistics in relation to the 6Mb array bait probe base space unless otherwise stated (\*high numbers of SNP calls are likely for bisulfite treated samples due to un-methylated C→T conversion)



**Table 2a**

| Methylation site<br>Primer set 15<br>(668-800bp)<br>CONTIG174481<br>_1-2021-596 | Status in next generation sequencing<br>data<br>Sample 12 | Peak in Sanger sequencing data<br>Sample 12 | Status in next generation sequencing<br>data<br>Sample 27 | Status in Sanger sequencing<br>data<br>Sample 27 |
|---------------------------------------------------------------------------------|-----------------------------------------------------------|---------------------------------------------|-----------------------------------------------------------|--------------------------------------------------|
| 689                                                                             | 96.8% un-methylated                                       | 100% T (un-methylated)                      | 97.6% un-methylated                                       | 100% T (un-methylated)                           |
| 690                                                                             | 98.7% un-methylated                                       | 100% T (un-methylated)                      | 99.6% un-methylated                                       | 100% T (un-methylated)                           |
| 692                                                                             | 99.3% un-methylated                                       | 100% T (un-methylated)                      | 98.5% un-methylated                                       | 100% T (un-methylated)                           |
| 696                                                                             | 98.6% un-methylated                                       | 100% T (un-methylated)                      | 98.6% un-methylated                                       | 100% T (un-methylated)                           |
| 699                                                                             | 98.3% un-methylated                                       | 100% T (un-methylated)                      | 98.2% un-methylated                                       | 100% T (un-methylated)                           |
| 700                                                                             | 98.9% un-methylated                                       | 100% T (un-methylated)                      | 99.5% un-methylated                                       | 100% T (un-methylated)                           |
| 701                                                                             | 99.7% un-methylated                                       | 100% T (un-methylated)                      | 99.9% un-methylated                                       | 100% T (un-methylated)                           |
| 706                                                                             | 63.9% G/36.1% A (meth on F strand)                        | ~50% A/50% G                                | 64.4% G/35.6% A (meth on F strand)                        | ~50% A/50% G                                     |
| 728                                                                             | 40% un-methylated                                         | ~60% C/40% T (un-methylated)                | 40% un-methylated                                         | ~60% C/40% T (un-methylated)                     |
| 730                                                                             | 97.4% un-methylated                                       | 100% T (un-methylated)                      | 99.0% un-methylated                                       | 100% T (un-methylated)                           |
| 733                                                                             | 44.2% un-methylated                                       | ~60% C/40% T (un-methylated)                | 44.2% un-methylated                                       | ~60% C/40% T (un-methylated)                     |
| 760                                                                             | 96.9% un-methylated                                       | 100% T (un-methylated)                      | 98.1% un-methylated                                       | 100% T (un-methylated)                           |
| 767                                                                             | 47.4% un-methylated                                       | ~55% C/45% T (un-methylated)                | 46.8% un-methylated                                       | ~55% C/45% T (un-methylated)                     |
| 788                                                                             | 98.8% un-methylated                                       | 100% T (un-methylated)                      | 98.9% un-methylated                                       | 100% T (un-methylated)                           |
| 795                                                                             | 98.5% un-methylated                                       | 100% T (un-methylated)                      | 97.9% un-methylated                                       | 100% T (un-methylated)                           |

**Table 2b**

| Methylation site<br>Primer set 1 (951-1190bp)<br>Contig318298_1-1640-953 | Status in next generation<br>sequencing data<br>Sample 12 | Peak in Sanger sequencing<br>data Sample 12 | Status in next generation<br>sequencing data<br>Sample 27 | Status in Sanger sequencing<br>data<br>Sample 27 |
|--------------------------------------------------------------------------|-----------------------------------------------------------|---------------------------------------------|-----------------------------------------------------------|--------------------------------------------------|
| 975                                                                      | 98.3% un-methylated                                       | T (un-methylated)                           | 99.1% un-methylated                                       | T (un-methylated)                                |
| 980                                                                      | 98% un-methylated                                         | T (un-methylated)                           | 96.9% un-methylated                                       | T (un-methylated)                                |
| 983                                                                      | 61% methylated                                            | C (methylated)                              | 63% methylated                                            | C (methylated)                                   |
| 1000                                                                     | 99.2% un-methylated                                       | T (un-methylated)                           | 99.7% un-methylated                                       | T (un-methylated)                                |
| 1003                                                                     | 99% un-methylated                                         | T (un-methylated)                           | 99% un-methylated                                         | T (un-methylated)                                |
| 1006                                                                     | 99% un-methylated                                         | T (un-methylated)                           | 99% un-methylated                                         | T (un-methylated)                                |
| 1007                                                                     | 98% un-methylated                                         | T (un-methylated)                           | 98.6% un-methylated                                       | T (un-methylated)                                |
| 1009                                                                     | 99.5% un-methylated                                       | T (un-methylated)                           | 97.9% un-methylated                                       | T (un-methylated)                                |
| 1013                                                                     | 98.6% un-methylated                                       | T (un-methylated)                           | 99.1% un-methylated                                       | T (un-methylated)                                |
| 1033                                                                     | 99.2% un-methylated                                       | T (un-methylated)                           | 98.8% un-methylated                                       | T (un-methylated)                                |
| 1034                                                                     | 99.5% un-methylated                                       | T (un-methylated)                           | 99.1% un-methylated                                       | T (un-methylated)                                |
| 1041                                                                     | 99.5% un-methylated                                       | T (un-methylated)                           | 98.7% un-methylated                                       | T (un-methylated)                                |
| 1046                                                                     | 99.4% un-methylated                                       | T (un-methylated)                           | 98.1% un-methylated                                       | T (un-methylated)                                |
| 1053                                                                     | 98.1% un-methylated                                       | T (un-methylated)                           | 98.% un-methylated                                        | T (un-methylated)                                |
| 1080                                                                     | 98.4% un-methylated                                       | T (un-methylated)                           | 98.6% un-methylated                                       | T (un-methylated)                                |
| 1081                                                                     | 99.2% un-methylated                                       | T (un-methylated)                           | 98.8% un-methylated                                       | T (un-methylated)                                |
| 1086                                                                     | 99.2% un-methylated                                       | T (un-methylated)                           | 98.8% un-methylated                                       | T (un-methylated)                                |
| 1089                                                                     | 98.2% un-methylated                                       | T (un-methylated)                           | 98.3% un-methylated                                       | T (un-methylated)                                |
| 1090                                                                     | 99% un-methylated                                         | T (un-methylated)                           | 99.2% un-methylated                                       | T (un-methylated)                                |
| 1092                                                                     | 98.9% un-methylated                                       | T (un-methylated)                           | 98.3% un-methylated                                       | T (un-methylated)                                |
| 1093                                                                     | 99.3% un-methylated                                       | T (un-methylated)                           | 98.9% un-methylated                                       | T (un-methylated)                                |
| 1096                                                                     | 99.3% un-methylated                                       | T (un-methylated)                           | 99.5% un-methylated                                       | T (un-methylated)                                |
| 1103                                                                     | 96.9% un-methylated                                       | T (un-methylated)                           | 96.6% un-methylated                                       | T (un-methylated)                                |
| 1104                                                                     | 98.9% un-methylated                                       | T (un-methylated)                           | 98.6% un-methylated                                       | T (un-methylated)                                |
| 1107                                                                     | 100% un-methylated                                        | T (un-methylated)                           | 98.4% un-methylated                                       | T (un-methylated)                                |
| 1115                                                                     | 98.8 % un-methylated                                      | T (un-methylated)                           | 98.5% un-methylated                                       | T (un-methylated)                                |
| 1119                                                                     | 98.7% un-methylated                                       | T (un-methylated)                           | 99.6% un-methylated                                       | T (un-methylated)                                |
| 1125                                                                     | 96.6% un-methylated                                       | T (un-methylated)                           | 98.1% un-methylated                                       | T (un-methylated)                                |
| 1129                                                                     | 96.5% methylated                                          | C (methylated)                              | 96.5% methylated                                          | C (methylated)                                   |
| 1138                                                                     | 98.5% methylated                                          | C (methylated)                              | 98.7% methylated                                          | C (methylated)                                   |
| 1145                                                                     | 84% un-methylated                                         | ~20% C /~80% T                              | 89% un-methylated                                         | ~20% C /~80% T                                   |
| 1146                                                                     | 99% un-methylated                                         | T (un-methylated)                           | 99.1% un-methylated                                       | T(un-methylated)                                 |
| 1154                                                                     | 96.9% un-methylated                                       | T (un-methylated)                           | 95.9% un-methylated                                       | T(un-methylated)                                 |

**Table 2c**

| Methylation site<br>Primer set 15<br>(678-761bp)<br>CONTIG643204<br>_1-1170-857 | Status in next generation<br>sequencing data<br>Sample 12 | Peak in Sanger sequencing data Sample<br>12 | Status in next generation<br>sequencing data<br>Sample 27 | Status in Sanger sequencing data<br>Sample 27 |
|---------------------------------------------------------------------------------|-----------------------------------------------------------|---------------------------------------------|-----------------------------------------------------------|-----------------------------------------------|
| 700                                                                             | 100% un-methylated                                        | T (un-methylated)                           | 100% un-methylated                                        | T (un-methylated)                             |
| 706                                                                             | 88.9% un-methylated                                       | T (un-methylated)                           | 100% un-methylated                                        | T (un-methylated)                             |
| 711                                                                             | 88.9% un-methylated                                       | T (un-methylated)                           | 100% un-methylated                                        | T (un-methylated)                             |
| 712                                                                             | 88.9% un-methylated                                       | T (un-methylated)                           | 95.5% un-methylated                                       | T (un-methylated)                             |
| 717                                                                             | 100% methylated                                           | C (methylated)                              | 84.6% methylated                                          | C (methylated)                                |
| 718                                                                             | 83.3% un-methylated                                       | T (un-methylated)                           | 92.0% un-methylated                                       | T (un-methylated)                             |
| 720                                                                             | 91.7% un-methylated                                       | T (un-methylated)                           | 92.3% un-methylated                                       | T (un-methylated)                             |
| 728                                                                             | 94.4% methylated                                          | C (methylated)                              | 85.7% methylated                                          | C (methylated)                                |
| 729                                                                             | 95.0% un-methylated                                       | T (un-methylated)                           | 97.3% un-methylated                                       | T (un-methylated)                             |
| 736                                                                             | 96.2% un-methylated                                       | T (un-methylated)                           | 95.2% un-methylated                                       | T (un-methylated)                             |
| 737                                                                             | 96.2% un-methylated                                       | T (un-methylated)                           | 97.6% un-methylated                                       | T (un-methylated)                             |
| 742                                                                             | 97.7% un-methylated                                       | T (un-methylated)                           | 98.0% un-methylated                                       | T (un-methylated)                             |
| 753                                                                             | 100% un-methylated                                        | T (un-methylated)                           | 98.5% un-methylated                                       | T (un-methylated)                             |
| 757                                                                             | 96.8% un-methylated                                       | T (un-methylated)                           | 98.6% un-methylated                                       | T (un-methylated)                             |

**Table 2d**

| Methylation site<br>Primer set 2<br>(1374-1684bp)<br>Contig44098_1040-<br>2994-1412 | Status in next generation sequencing data<br>Sample 12 | Peak in Sanger sequencing data<br>Sample 12 | Status in next generation<br>sequencing data<br>Sample 27 | Status in Sanger sequencing<br>data<br>Sample 27 |
|-------------------------------------------------------------------------------------|--------------------------------------------------------|---------------------------------------------|-----------------------------------------------------------|--------------------------------------------------|
| 1404                                                                                | 98.8% un-methylated                                    | T (un-methylated)                           | 99.1% un-methylated                                       | T (un-methylated)                                |
| 1407                                                                                | 97.9% un-methylated                                    | T (un-methylated)                           | 98.9% un-methylated                                       | T (un-methylated)                                |
| 1412                                                                                | 98.9% un-methylated                                    | T (un-methylated)                           | 98.1% un-methylated                                       | T (un-methylated)                                |
| 1413                                                                                | 100% methylated (G as F seq C)                         | G (methylated)                              | 100% methylated                                           | G (methylated)                                   |
| 1414                                                                                | 95.9% methylated                                       | C (methylated)                              | 88.5% methylated                                          | C (methylated)                                   |
| 1417                                                                                | 92.9% methylated                                       | ~60% C (methylated) 40% G                   | 87.9% methylated                                          | ~50% C (methylated) 50% G                        |
| 1424                                                                                | 98.3% un-methylated                                    | T (un-methylated)                           | 99.1% un-methylated                                       | T (un-methylated)                                |
| 1426                                                                                | 99.8% un-methylated                                    | T (un-methylated)                           | 99.0% un-methylated                                       | T (un-methylated)                                |
| 1435                                                                                | 99.3% un-methylated                                    | T (un-methylated)                           | 99.8% un-methylated                                       | T (un-methylated)                                |
| 1445                                                                                | 98.7% un-methylated                                    | T (un-methylated)                           | 99.4% un-methylated                                       | T (un-methylated)                                |
| 1448                                                                                | 99.7% un-methylated                                    | T (un-methylated)                           | 98.4% un-methylated                                       | T (un-methylated)                                |
| 1459                                                                                | 99.9% un-methylated                                    | T (un-methylated)                           | 98.9% un-methylated                                       | T (un-methylated)                                |
| 1469                                                                                | 98.8% un-methylated                                    | T (un-methylated)                           | 98.2% un-methylated                                       | T (un-methylated)                                |
| 1470                                                                                | 98.6% un-methylated                                    | T (un-methylated)                           | 99.5% un-methylated                                       | T (un-methylated)                                |
| 1472                                                                                | 99.5% un-methylated                                    | T (un-methylated)                           | 99.0% un-methylated                                       | T (un-methylated)                                |
| 1473                                                                                | 98.0% un-methylated                                    | T (un-methylated)                           | 99.2% un-methylated                                       | T (un-methylated)                                |
| 1474                                                                                | 99.6% un-methylated                                    | T (un-methylated)                           | 99.2% un-methylated                                       | T (un-methylated)                                |
| 1476                                                                                | 85.5% methylated                                       | C ~90%/T ~10%                               | 84.4% methylated                                          | C ~90%/T ~10%                                    |
| 1479                                                                                | 98.8% un-methylated                                    | T (un-methylated)                           | 98.9% un-methylated                                       | T (un-methylated)                                |
| 1480                                                                                | 99.3% un-methylated                                    | T (un-methylated)                           | 99.4% un-methylated                                       | T (un-methylated)                                |
| 1485                                                                                | 98.9% un-methylated                                    | T (un-methylated)                           | 98.9% un-methylated                                       | T (un-methylated)                                |
| 1489                                                                                | 99.3% un-methylated                                    | T (un-methylated)                           | 99.5% un-methylated                                       | T (un-methylated)                                |
| 1491                                                                                | 74.9% un-methylated                                    | C ~1/3%/ T ~ 2/3%                           | 70.2% un-methylated                                       | C ~40% /T ~60%                                   |
| 1498                                                                                | 99.0% un-methylated                                    | T (un-methylated)                           | 99.0% un-methylated                                       | T (un-methylated)                                |
| 1503                                                                                | 99.4% un-methylated                                    | T (un-methylated)                           | 99.3% un-methylated                                       | T (un-methylated)                                |
| 1514                                                                                | 98.5% un-methylated                                    | T (un-methylated)                           | 98.5% un-methylated                                       | T (un-methylated)                                |
| 1515                                                                                | 99.1% un-methylated                                    | T (un-methylated)                           | 100% un-methylated                                        | T (un-methylated)                                |
| 1521                                                                                | 100% un-methylated                                     | T (un-methylated)                           | 99.4% un-methylated                                       | T (un-methylated)                                |
| 1528                                                                                | 56.5% methylated                                       | C ~ 50%/T ~ 50%                             | 59.0% methylated                                          | C ~ 50%/T ~ 50%                                  |
| 1533                                                                                | 44.9% methylated                                       | C ~ 50%/T ~ 50%                             | 43.4% methylated                                          | C ~ 50%/T ~ 50%                                  |
| 1535                                                                                | 99.4% un-methylated                                    | T (un-methylated)                           | 97.6% un-methylated                                       | T (un-methylated)                                |
| 1543                                                                                | 88.0% methylated                                       | ~90% C/ ~10% T                              | 87.9% methylated                                          | ~90% C /~10% T                                   |
| 1544                                                                                | 99.3% un-methylated                                    | T (un-methylated)                           | 99.7% un-methylated                                       | T(un-methylated)                                 |
| 1551                                                                                | 100% un-methylated                                     | T (un-methylated)                           | 99.6% un-methylated                                       | T(un-methylated)                                 |
| 1555                                                                                | 92.9% un-methylated                                    | T (un-methylated)/ ~10% C                   | 90.6% un-methylated                                       | T (un-methylated)/ ~10% C                        |
| 1557                                                                                | 99.4% un-methylated                                    | T (un-methylated)                           | 99.5% un-methylated                                       | T (un-methylated)                                |
| 1558                                                                                | 99.4% un-methylated                                    | T (un-methylated)                           | 100% un-methylated                                        | T (un-methylated)                                |
| 1567                                                                                | 100% un-methylated                                     | T (un-methylated)                           | 99.2% un-methylated                                       | T (un-methylated)                                |
| 1574                                                                                | 95.9% un-methylated                                    | T (un-methylated)                           | 96.3% un-methylated                                       | T (un-methylated)                                |
| 1576                                                                                | 98.5% un-methylated                                    | T (un-methylated)                           | 97.3% un-methylated                                       | T (un-methylated)                                |

**Table 2e**

| Methylation site<br>Primer set 3<br>(1387-1526bp)<br>CONTIG248041_1-<br>1793-1442 | Status in next generation sequencing data<br>Sample 12 | Peak in Sanger sequencing data<br>Sample 12 | Status in next generation<br>sequencing data<br>Sample 27 | Status in Sanger<br>sequencing data<br>Sample 27 |
|-----------------------------------------------------------------------------------|--------------------------------------------------------|---------------------------------------------|-----------------------------------------------------------|--------------------------------------------------|
| 1387                                                                              | 100% un-methylated                                     | T (un-methylated)                           | 100% un-methylated                                        | T (un-methylated)                                |
| 1389                                                                              | 98.6% un-methylated                                    | T (un-methylated)                           | 100% un-methylated                                        | T (un-methylated)                                |
| 1390                                                                              | 98.7% un-methylated                                    | T (un-methylated)                           | 97% un-methylated                                         | T (un-methylated)                                |
| 1391                                                                              | 98.8% un-methylated                                    | T (un-methylated)                           | 97% un-methylated                                         | T (un-methylated)                                |
| 1392                                                                              | 100% un-methylated                                     | T (un-methylated)                           | 93.9% un-methylated                                       | T (un-methylated)                                |
| 1395                                                                              | 94.7% un-methylated                                    | T (un-methylated)                           | 97% un-methylated                                         | T (un-methylated)                                |
| 1396                                                                              | 100% un-methylated                                     | T (un-methylated)                           | 93.9% un-methylated                                       | T (un-methylated)                                |
| 1399                                                                              | 99.0% un-methylated                                    | T (un-methylated)                           | 97% un-methylated                                         | T (un-methylated)                                |
| 1400                                                                              | 100% un-methylated                                     | T (un-methylated)                           | 94.1% un-methylated                                       | T (un-methylated)                                |
| 1403                                                                              | 100% un-methylated                                     | T (un-methylated)                           | 96.4% un-methylated                                       | T (un-methylated)                                |
| 1409                                                                              | 100% un-methylated                                     | T (un-methylated)                           | 96.9% un-methylated                                       | T (un-methylated)                                |
| 1421                                                                              | 96.2% un-methylated                                    | T (un-methylated)                           | 97.7% un-methylated                                       | T (un-methylated)                                |
| 1423                                                                              | 99.3% un-methylated                                    | T (un-methylated)                           | 98.9% un-methylated                                       | T (un-methylated)                                |
| 1428                                                                              | 100% un-methylated                                     | T (un-methylated)                           | 97.8% un-methylated                                       | T (un-methylated)                                |
| 1430                                                                              | 98.6% un-methylated                                    | T (un-methylated)                           | 97.9% un-methylated                                       | T (un-methylated)                                |
| 1436                                                                              | 99.4% un-methylated                                    | T (un-methylated)                           | 97.4% un-methylated                                       | T (un-methylated)                                |
| 1438                                                                              | 98.8% un-methylated                                    | T (un-methylated)                           | 99.1% un-methylated                                       | T (un-methylated)                                |
| 1440                                                                              | 99.4% un-methylated                                    | T (un-methylated)                           | 96.6% un-methylated                                       | T (un-methylated)                                |
| 1442                                                                              | 100% un-methylated                                     | T (un-methylated)                           | 94.6% un-methylated                                       | T (un-methylated)                                |
| 1444                                                                              | 97.8% un-methylated                                    | T (un-methylated)                           | 97.9% un-methylated                                       | T (un-methylated)                                |
| 1447                                                                              | 99.5% un-methylated                                    | T (un-methylated)                           | 99.4% un-methylated                                       | T (un-methylated)                                |
| 1454                                                                              | 98.5% un-methylated                                    | T (un-methylated)                           | 98.4% un-methylated                                       | T (un-methylated)                                |
| 1456                                                                              | 99.1% un-methylated                                    | T (un-methylated)                           | 98.9% un-methylated                                       | T (un-methylated)                                |
| 1461                                                                              | 98.2% un-methylated                                    | T (un-methylated)                           | 99.5% un-methylated                                       | T (un-methylated)                                |
| 1469                                                                              | 98.8% un-methylated                                    | T (un-methylated)                           | 98.5% un-methylated                                       | T (un-methylated)                                |
| 1471                                                                              | 98.8% un-methylated                                    | T (un-methylated)                           | 99.5% un-methylated                                       | T (un-methylated)                                |
| 1472                                                                              | 99.2% un-methylated                                    | T (un-methylated)                           | 98.5% un-methylated                                       | T (un-methylated)                                |
| 1473                                                                              | 99.2% un-methylated                                    | T (un-methylated)                           | 99.0% un-methylated                                       | T (un-methylated)                                |
| 1475                                                                              | 95.8% un-methylated                                    | T (un-methylated)                           | 97.0% un-methylated                                       | T (un-methylated)                                |
| 1476                                                                              | 98.9% un-methylated                                    | T (un-methylated)                           | 98.5% un-methylated                                       | T (un-methylated)                                |
| 1478                                                                              | 98.5% un-methylated                                    | T (un-methylated)                           | 97.6% un-methylated                                       | T (un-methylated)                                |
| 1482                                                                              | 99.6% un-methylated                                    | T (un-methylated)                           | 98.6% un-methylated                                       | T (un-methylated)                                |
| 1490                                                                              | 99.6% un-methylated                                    | T (un-methylated)                           | 99.1% un-methylated                                       | T (un-methylated)                                |
| 1496                                                                              | 99.3% un-methylated                                    | T (un-methylated)                           | 98.8% un-methylated                                       | T (un-methylated)                                |
| 1498                                                                              | 98.5% un-methylated                                    | T (un-methylated)                           | 97.9% un-methylated                                       | T (un-methylated)                                |
| 1503                                                                              | 99.3% un-methylated                                    | T (un-methylated)                           | 99.2% un-methylated                                       | T (un-methylated)                                |
| 1510                                                                              | 99.2% un-methylated                                    | T (un-methylated)                           | 99.1% un-methylated                                       | T (un-methylated)                                |
| 1512                                                                              | 99.6% un-methylated                                    | T (un-methylated)                           | 97.8% un-methylated                                       | T (un-methylated)                                |
| 1515                                                                              | 98.8% un-methylated                                    | T (un-methylated)                           | 98.6% un-methylated                                       | T (un-methylated)                                |
| 1516                                                                              | 99.2% un-methylated                                    | T (un-methylated)                           | 98.2% un-methylated                                       | T (un-methylated)                                |
| 1517                                                                              | 99.6% un-methylated                                    | T (un-methylated)                           | 97.3% un-methylated                                       | T (un-methylated)                                |
| 1521                                                                              | 99.6% un-methylated                                    | T (un-methylated)                           | 98.3% un-methylated                                       | T (un-methylated)                                |
| 1526                                                                              | 100% un-methylated                                     | T (un-methylated)                           | 99.6% un-methylated                                       | T (un-methylated)                                |

**Table 2f**

| Methylation site<br>Primer set 15<br>(79-423bp)<br>CONTIG256716<br>_1-1768-36 | Status in next generation<br>sequencing data<br>Sample 12 | Peak in Sanger sequencing data Sample<br>12 | Status in next generation<br>sequencing data<br>Sample 27 | Status in Sanger sequencing data<br>Sample 27 |
|-------------------------------------------------------------------------------|-----------------------------------------------------------|---------------------------------------------|-----------------------------------------------------------|-----------------------------------------------|
| 102                                                                           | 28.8% un-methylated (C on F)                              | ~20% A (un-methylated)/~80% G               | 28.6% un-methylated (C on F)                              | ~20% A (un-methylated)/~80% G                 |
| 106                                                                           | 98.8% un-methylated                                       | T (un-methylated)                           | 98.7% un-methylated                                       | T (un-methylated)                             |
| 115                                                                           | 98.5% un-methylated                                       | T (un-methylated)                           | 98.8% un-methylated                                       | T (un-methylated)                             |
| 118                                                                           | 98.5% un-methylated                                       | T (un-methylated)                           | 99.6% un-methylated                                       | T (un-methylated)                             |
| 127                                                                           | 99% un-methylated                                         | T (un-methylated)                           | 98.8% un-methylated                                       | T (un-methylated)                             |
| 131                                                                           | 98.3% un-methylated                                       | T (un-methylated)                           | 97.6% un-methylated                                       | T (un-methylated)                             |
| 136                                                                           | 98.5% un-methylated                                       | T (un-methylated)                           | 98.5% un-methylated                                       | T (un-methylated)                             |
| 140                                                                           | 99.3% un-methylated                                       | T (un-methylated)                           | 99.3% un-methylated                                       | T (un-methylated)                             |
| 144                                                                           | 97.5% un-methylated                                       | T (un-methylated)                           | 97.5% un-methylated                                       | T (un-methylated)                             |
| 145                                                                           | 98.0% un-methylated                                       | T (un-methylated)                           | 98.5% un-methylated                                       | T (un-methylated)                             |
| 149                                                                           | 99.2% un-methylated                                       | T (un-methylated)                           | 98.2% un-methylated                                       | T (un-methylated)                             |
| 152                                                                           | 98.4% un-methylated                                       | T (un-methylated)                           | 97.7% un-methylated                                       | T (un-methylated)                             |
| 156                                                                           | 30.2% methylated (C on F)                                 | ~60% A (un-methylated)/~40% G               | 32.2% methylated (C on F)                                 | ~60% A (un-methylated)/~40% G                 |
| 159                                                                           | 98.1% un-methylated                                       | T (un-methylated)                           | 98.5% un-methylated                                       | T (un-methylated)                             |
| 161                                                                           | 98.4% un-methylated                                       | T (un-methylated)                           | 98.0% un-methylated                                       | T (un-methylated)                             |
| 163                                                                           | 97.1% un-methylated                                       | T (un-methylated)                           | 97.1% un-methylated                                       | T (un-methylated)                             |
| 164                                                                           | 98.4% un-methylated                                       | T (un-methylated)                           | 98.2% un-methylated                                       | T (un-methylated)                             |
| 165                                                                           | 98.9% un-methylated                                       | T (un-methylated)                           | 98.5% un-methylated                                       | T (un-methylated)                             |
| 166                                                                           | 98.9% un-methylated                                       | T (un-methylated)                           | 98.8% un-methylated                                       | T (un-methylated)                             |
| 172                                                                           | 98.9% un-methylated                                       | T (un-methylated)                           | 98.7% un-methylated                                       | T (un-methylated)                             |
| 186                                                                           | 96.6% un-methylated                                       | T (un-methylated)                           | 98.1% un-methylated                                       | T (un-methylated)                             |
| 187                                                                           | 98.4% un-methylated                                       | T (un-methylated)                           | 98.4% un-methylated                                       | T (un-methylated)                             |
| 188                                                                           | 97.5% un-methylated                                       | T (un-methylated)                           | 99.0% un-methylated                                       | T (un-methylated)                             |
| 197                                                                           | 97.1% un-methylated                                       | T (un-methylated)                           | 97.7% un-methylated                                       | T (un-methylated)                             |
| 199                                                                           | 97.4% un-methylated                                       | T (un-methylated)                           | 97.6% un-methylated                                       | T (un-methylated)                             |
| 201                                                                           | 95.9% un-methylated                                       | T (un-methylated)                           | 96.1% un-methylated                                       | T (un-methylated)                             |
| 202                                                                           | 98.6% un-methylated                                       | T (un-methylated)                           | 99.0% un-methylated                                       | T (un-methylated)                             |
| 220                                                                           | 96% un-methylated                                         | T (un-methylated)                           | 97.4% un-methylated                                       | T (un-methylated)                             |
| 229                                                                           | 97.7% un-methylated                                       | T (un-methylated)                           | 98.1% un-methylated                                       | T (un-methylated)                             |
| 232                                                                           | 97.5% un-methylated                                       | T (un-methylated)                           | 97.0% un-methylated                                       | T (un-methylated)                             |
| 233                                                                           | 96.8% un-methylated                                       | T (un-methylated)                           | 98.0% un-methylated                                       | T (un-methylated)                             |
| 237                                                                           | 97.4% un-methylated                                       | T (un-methylated)                           | 96.9% un-methylated                                       | T (un-methylated)                             |
| 239                                                                           | 97.4% un-methylated                                       | T (un-methylated)                           | 99.5% un-methylated                                       | T (un-methylated)                             |
| 255                                                                           | 10.1% un-methylated                                       | ~10% un-methylated                          | 8.7% un-methylated                                        | ~10% un-methylated                            |
| 274                                                                           | 96.6% un-methylated                                       | T (un-methylated)                           | 92.8% un-methylated                                       | T (un-methylated)                             |
| 275                                                                           | 96.6% un-methylated                                       | T (un-methylated)                           | 98.8% un-methylated                                       | T (un-methylated)                             |
| 279                                                                           | 96.6% un-methylated                                       | T (un-methylated)                           | 98.8% un-methylated                                       | T (un-methylated)                             |
| 283                                                                           | 98.1% un-methylated                                       | T (un-methylated)                           | 98.7% un-methylated                                       | T (un-methylated)                             |
| 286                                                                           | 98.0% un-methylated                                       | T (un-methylated)                           | 97.3% un-methylated                                       | T (un-methylated)                             |
| 308                                                                           | 100% un-methylated                                        | T (un-methylated)                           | 97.1% un-methylated                                       | T (un-methylated)                             |
| 310                                                                           | 100% un-methylated                                        | T (un-methylated)                           | 90.9% un-methylated                                       | T (un-methylated)                             |
| 311                                                                           | 100% un-methylated                                        | T (un-methylated)                           | 100% un-methylated                                        | T (un-methylated)                             |
| 316                                                                           | 95.8% un-methylated                                       | T (un-methylated)                           | 100% un-methylated                                        | T (un-methylated)                             |

**Table 2g**

| Methylation site<br>Primer set 15<br>(893-1115bp)<br>CONTIG462845_1<br>-1429-894 | Status in next generation<br>sequencing data<br>Sample 12 | Peak in Sanger sequencing data<br>Sample 12 | Methylation<br>site | Status in next generation<br>sequencing data<br>Sample 12 | Status in Sanger<br>sequencing data<br>Sample 12 |
|----------------------------------------------------------------------------------|-----------------------------------------------------------|---------------------------------------------|---------------------|-----------------------------------------------------------|--------------------------------------------------|
| 894                                                                              | 98.4% un-methylated                                       | T (un-methylated)                           | 964                 | 98.9% un-methylated                                       | T (un-methylated)                                |
| 899                                                                              | 100% un-methylated                                        | T (un-methylated)                           | 965                 | 98.9% un-methylated                                       | T (un-methylated)                                |
| 900                                                                              | 99.7% un-methylated                                       | T (un-methylated)                           | 972                 | 99.2% un-methylated                                       | T (un-methylated)                                |
| 901                                                                              | 99.3% un-methylated                                       | T (un-methylated)                           | 981                 | 99.5% un-methylated                                       | T (un-methylated)                                |
| 906                                                                              | 99.7% un-methylated                                       | T (un-methylated)                           | 983                 | 98.2% un-methylated                                       | T (un-methylated)                                |
| 907                                                                              | 99.3% un-methylated                                       | T (un-methylated)                           | 984                 | 100% un-methylated                                        | T (un-methylated)                                |
| 912                                                                              | 97.3% un-methylated                                       | T (un-methylated)                           | 985                 | 98.4% un-methylated                                       | T (un-methylated)                                |
| 924                                                                              | 98.7% un-methylated                                       | T (un-methylated)                           | 987                 | 96.1% un-methylated                                       | T (un-methylated)                                |
| 926                                                                              | 99.4% un-methylated                                       | T (un-methylated)                           | 990                 | 99.5% un-methylated                                       | T (un-methylated)                                |
| 928                                                                              | 98.7% un-methylated                                       | T (un-methylated)                           | 992                 | 99.0% un-methylated                                       | T (un-methylated)                                |
| 930                                                                              | 56.6% un-methylated                                       | ~60% T (un-methylated)/ ~40% C              | 996                 | 99.2% un-methylated                                       | T (un-methylated)                                |
| 931                                                                              | 99.4% un-methylated                                       | T (un-methylated)                           | 1003                | 98.3% un-methylated                                       | T (un-methylated)                                |
| 937                                                                              | 98.7% un-methylated                                       | T (un-methylated)                           | 1015                | 98.0% un-methylated                                       | T (un-methylated)                                |
| 940                                                                              | 95.7% un-methylated                                       | T (un-methylated)                           | 1017                | 98.4% un-methylated                                       | T (un-methylated)                                |
| 941                                                                              | 98.1% un-methylated                                       | T (un-methylated)                           | 1019                | 98.8% un-methylated                                       | T (un-methylated)                                |
| 942                                                                              | 99.1% un-methylated                                       | T (un-methylated)                           | 1024                | 98.4% un-methylated                                       | T (un-methylated)                                |
| 946                                                                              | 97.8% un-methylated                                       | T (un-methylated)                           | 1026                | 99.2% un-methylated                                       | T (un-methylated)                                |
| 949                                                                              | 99.8% un-methylated                                       | T (un-methylated)                           | 1036                | 98.1% un-methylated                                       | T (un-methylated)                                |
| 958                                                                              | 99.3% un-methylated                                       | T (un-methylated)                           | 1039                | 98.5% un-methylated                                       | T (un-methylated)                                |
| 960                                                                              | 97.8% un-methylated                                       | T (un-methylated)                           | 1048                | 98.2% un-methylated                                       | T (un-methylated)                                |
| 962                                                                              | 99.3% un-methylated                                       | T (un-methylated)                           |                     |                                                           |                                                  |

**Table 2h**

| Methylation site<br>Primer set 15<br>(1145-1290bp)<br>CONTIG381103<br>_1-1538-1308 | Status in next generation sequencing data<br>Sample 12 | Peak in Sanger sequencing data<br>Sample 12 | Status in next generation sequencing data<br>Sample 27 | Status in Sanger sequencing data<br>Sample 27 |
|------------------------------------------------------------------------------------|--------------------------------------------------------|---------------------------------------------|--------------------------------------------------------|-----------------------------------------------|
| 1145                                                                               | 100% un-methylated                                     | T (un-methylated)                           | 100% un-methylated                                     | T (un-methylated)                             |
| 1147                                                                               | 100% un-methylated                                     | T (un-methylated)                           | 100% un-methylated                                     | T (un-methylated)                             |
| 1150                                                                               | 100% un-methylated                                     | T (un-methylated)                           | 100% un-methylated                                     | T (un-methylated)                             |
| 1153                                                                               | 100% un-methylated                                     | T (un-methylated)                           | 100% un-methylated                                     | T (un-methylated)                             |
| 1155                                                                               | 100% un-methylated                                     | T (un-methylated)                           | 100% un-methylated                                     | T (un-methylated)                             |
| 1162                                                                               | 100% un-methylated                                     | T (un-methylated)                           | 100% un-methylated                                     | T (un-methylated)                             |
| 1164                                                                               | 78.6% methylated                                       | C (methylated)                              | 84.6% methylated                                       | C (methylated)                                |
| 1167                                                                               | 86.7% un-methylated                                    | ~50% C/50% T                                | 83.3% un-methylated                                    | ~50% C/50% T                                  |
| 1170                                                                               | 100% un-methylated                                     | T (un-methylated)                           | 100% un-methylated                                     | T (un-methylated)                             |
| 1171                                                                               | 100% un-methylated                                     | T (un-methylated)                           | 100% un-methylated                                     | T (un-methylated)                             |
| 1175                                                                               | 95.2% un-methylated                                    | T (un-methylated)                           | 100% un-methylated                                     | T (un-methylated)                             |
| 1176                                                                               | 100% un-methylated                                     | T (un-methylated)                           | 100% un-methylated                                     | T (un-methylated)                             |
| 1182                                                                               | 100% un-methylated                                     | T (un-methylated)                           | 100% un-methylated                                     | T (un-methylated)                             |
| 1193                                                                               | 100% un-methylated                                     | T (un-methylated)                           | 97.7% un-methylated                                    | T (un-methylated)                             |
| 1194                                                                               | 96.4% un-methylated                                    | T (un-methylated)                           | 97.7% un-methylated                                    | T (un-methylated)                             |
| 1199                                                                               | 97.1% un-methylated                                    | T (un-methylated)                           | 96.5% un-methylated                                    | T (un-methylated)                             |
| 1200                                                                               | 100% un-methylated                                     | T (un-methylated)                           | 100% un-methylated                                     | T (un-methylated)                             |
| 1201                                                                               | 100% un-methylated                                     | T (un-methylated)                           | 98.2% un-methylated                                    | T (un-methylated)                             |
| 1202                                                                               | 100% un-methylated                                     | T (un-methylated)                           | 100% un-methylated                                     | T (un-methylated)                             |
| 1205                                                                               | 100% un-methylated                                     | T (un-methylated)                           | 100% un-methylated                                     | T (un-methylated)                             |
| 1212                                                                               | 100% un-methylated                                     | T (un-methylated)                           | 100% un-methylated                                     | T (un-methylated)                             |
| 1218                                                                               | 100% un-methylated                                     | T (un-methylated)                           | 100% un-methylated                                     | T (un-methylated)                             |
| 1229                                                                               | 100% un-methylated                                     | T (un-methylated)                           | 98.6% un-methylated                                    | T (un-methylated)                             |
| 1240                                                                               | 99.2% un-methylated                                    | T (un-methylated)                           | 100% un-methylated                                     | T (un-methylated)                             |
| 1248                                                                               | 41.0% un-methylated                                    | ~40% C/ ~60% T (un-methylated)              | 44.4% un-methylated                                    | ~40% C/ ~60% T (un-methylated)                |
| 1253                                                                               | 97.0% un-methylated                                    | T (un-methylated)                           | 97.8% un-methylated                                    | T (un-methylated)                             |
| 1275                                                                               | 100% un-methylated                                     | T (un-methylated)                           | 100% un-methylated                                     | T (un-methylated)                             |
| 1277                                                                               | 98.8% un-methylated                                    | T (un-methylated)                           | 98.1% un-methylated                                    | T (un-methylated)                             |
| 1278                                                                               | 100% un-methylated                                     | T (un-methylated)                           | 100% un-methylated                                     | T (un-methylated)                             |
| 1283                                                                               | 99.4% un-methylated                                    | T (un-methylated)                           | 100% un-methylated                                     | T (un-methylated)                             |
| 1288                                                                               | 98.8% un-methylated                                    | T (un-methylated)                           | 100% un-methylated                                     | T (un-methylated)                             |
| 1290                                                                               | 99.4% un-methylated                                    | T (un-methylated)                           | 100% un-methylated                                     | T (un-methylated)                             |

**Table 2i**

| Methylation site<br>Primer set 15<br>(217-503bp)<br>CONTIG117347<br>4_1-941-195 | Status in next generation sequencing data<br>Sample 12 | Peak in Sanger sequencing data Sample 12 | Status in next generation sequencing data<br>Sample 27 | Status in Sanger sequencing data<br>Sample 27 |
|---------------------------------------------------------------------------------|--------------------------------------------------------|------------------------------------------|--------------------------------------------------------|-----------------------------------------------|
| 252                                                                             | 71.8% un-methylated                                    | T (un-methylated)                        | 89.1% un-methylated                                    | T (un-methylated)                             |
| 271                                                                             | 100% un-methylated                                     | T (un-methylated)                        | 97.1% un-methylated                                    | T (un-methylated)                             |
| 275                                                                             | 27.7% methylated (C on F)                              | A (un-methylated)                        | 29.1% methylated (C on F)                              | A (un-methylated)                             |
| 278                                                                             | 98.2% un-methylated                                    | T (un-methylated)                        | 98.3% un-methylated                                    | T (un-methylated)                             |
| 287                                                                             | 94.9% un-methylated                                    | T (un-methylated)                        | 100% un-methylated                                     | T (un-methylated)                             |
| 299                                                                             | 97% methylated                                         | C (methylated)                           | 96.3% methylated                                       | C (methylated)                                |
| 309                                                                             | 80.9% un-methylated                                    | ~80% T (un-methylated)/~20% C            | 79.9% un-methylated                                    | ~70% T (un-methylated)/~30% C                 |
| 323                                                                             | 99.3% un-methylated                                    | T (un-methylated)                        | 99.5% un-methylated                                    | T (un-methylated)                             |
| 339                                                                             | 98.9% un-methylated                                    | T (un-methylated)                        | 100% un-methylated                                     | T (un-methylated)                             |
| 342                                                                             | 94.4% un-methylated                                    | T (un-methylated)                        | 94.1% un-methylated                                    | T (un-methylated)                             |
| 345                                                                             | 94.4% un-methylated                                    | T (un-methylated)                        | 97.9% un-methylated                                    | T (un-methylated)                             |
| 346                                                                             | 97.2% un-methylated                                    | T (un-methylated)                        | 100% un-methylated                                     | T (un-methylated)                             |
| 351                                                                             | 89.8% un-methylated                                    | ~90% T (un-methylated)/~10% C            | 90.9% un-methylated                                    | ~90% T (un-methylated)/~10% C                 |
| 359                                                                             | 97.8% un-methylated                                    | T (un-methylated)                        | 97.0% un-methylated                                    | T (un-methylated)                             |
| 364                                                                             | 98.2% un-methylated                                    | T (un-methylated)                        | 98.6% un-methylated                                    | T (un-methylated)                             |
| 368                                                                             | 98.3% methylated                                       | C (methylated)                           | 96.7% methylated                                       | C(methylated)                                 |
| 370                                                                             | 98.1% un-methylated                                    | T (un-methylated)                        | 97.5% un-methylated                                    | T (un-methylated)                             |
| 374                                                                             | 97.8% un-methylated                                    | T (un-methylated)                        | 98.9% un-methylated                                    | T (un-methylated)                             |
| 376                                                                             | 97.0% un-methylated                                    | T (un-methylated)                        | 100% un-methylated                                     | T (un-methylated)                             |
| 381                                                                             | 94.4% un-methylated                                    | T (un-methylated)                        | 96.9% un-methylated                                    | T (un-methylated)                             |
| 388                                                                             | 98.0% un-methylated                                    | T (un-methylated)                        | 100% un-methylated                                     | T (un-methylated)                             |
| 390                                                                             | 99.0% un-methylated                                    | T (un-methylated)                        | 98.2% un-methylated                                    | T (un-methylated)                             |
| 393                                                                             | 94.1% un-methylated                                    | T (un-methylated)                        | 100% un-methylated                                     | T (un-methylated)                             |
| 403                                                                             | 95.9% un-methylated                                    | T (un-methylated)                        | 97.3% un-methylated                                    | T (un-methylated)                             |
| 409                                                                             | 83.3% un-methylated                                    | ~80% T (un-methylated)/ ~20% C           | 78.3% un-methylated                                    | ~80% T (un-methylated)/ ~20% C                |
| 410                                                                             | 98.3% un-methylated                                    | T (un-methylated)                        | 98.3% un-methylated                                    | T (un-methylated)                             |
| 414                                                                             | 98.2% un-methylated                                    | T (un-methylated)                        | 98.1% un-methylated                                    | T (un-methylated)                             |
| 429                                                                             | 92.9% un-methylated                                    | T (un-methylated)                        | 100% un-methylated                                     | T (un-methylated)                             |
| 430                                                                             | 100% un-methylated                                     | T (un-methylated)                        | 100% un-methylated                                     | T (un-methylated)                             |
| 435                                                                             | 100% un-methylated                                     | T (un-methylated)                        | 100% un-methylated                                     | T (un-methylated)                             |



**Table 2j**

| Methylation site<br>Primer set 15<br>(893-1115bp)<br>CONTIG462845<br>_1-1429-894 | Status in next generation<br>sequencing data<br>Sample 12 | Peak in Sanger sequencing data Sample<br>12 | Status in next generation<br>sequencing data<br>Sample 27 | Status in Sanger sequencing data<br>Sample 27 |
|----------------------------------------------------------------------------------|-----------------------------------------------------------|---------------------------------------------|-----------------------------------------------------------|-----------------------------------------------|
| 894                                                                              | 98.4% un-methylated                                       | T (un-methylated)                           | 98.3% un-methylated                                       | T (un-methylated)                             |
| 899                                                                              | 100% un-methylated                                        | T (un-methylated)                           | 98.6% un-methylated                                       | T (un-methylated)                             |
| 900                                                                              | 99.7% un-methylated                                       | T (un-methylated)                           | 98.2% un-methylated                                       | T (un-methylated)                             |
| 901                                                                              | 99.3% un-methylated                                       | T (un-methylated)                           | 98.2% un-methylated                                       | T (un-methylated)                             |
| 906                                                                              | 99.7% un-methylated                                       | T (un-methylated)                           | 97.9% un-methylated                                       | T (un-methylated)                             |
| 907                                                                              | 99.3% un-methylated                                       | T (un-methylated)                           | 97.5% un-methylated                                       | T (un-methylated)                             |
| 912                                                                              | 97.3% un-methylated                                       | T (un-methylated)                           | 99.4% un-methylated                                       | T (un-methylated)                             |
| 924                                                                              | 98.7% un-methylated                                       | T (un-methylated)                           | 98.8% un-methylated                                       | T (un-methylated)                             |
| 926                                                                              | 99.4% un-methylated                                       | T (un-methylated)                           | 98.1% un-methylated                                       | T (un-methylated)                             |
| 928                                                                              | 98.7% un-methylated                                       | T (un-methylated)                           | 99.8% un-methylated                                       | T (un-methylated)                             |
| 930                                                                              | 56.6% un-methylated                                       | ~60% T (un-methylated)/ ~40% C              | 51.3% un-methylated                                       | ~55% T (un-methylated)/ ~45% C                |
| 931                                                                              | 99.4% un-methylated                                       | T (un-methylated)                           | 99.8% un-methylated                                       | T (un-methylated)                             |
| 937                                                                              | 98.7% un-methylated                                       | T (un-methylated)                           | 99.1% un-methylated                                       | T (un-methylated)                             |
| 940                                                                              | 95.7% un-methylated                                       | T (un-methylated)                           | 95.4% un-methylated                                       | T (un-methylated)                             |
| 941                                                                              | 98.1% un-methylated                                       | T (un-methylated)                           | 99.5% un-methylated                                       | T (un-methylated)                             |
| 942                                                                              | 99.1% un-methylated                                       | T (un-methylated)                           | 99.3% un-methylated                                       | T (un-methylated)                             |
| 946                                                                              | 97.8% un-methylated                                       | T (un-methylated)                           | 99.4% un-methylated                                       | T (un-methylated)                             |
| 949                                                                              | 99.8% un-methylated                                       | T (un-methylated)                           | 99.1% un-methylated                                       | T (un-methylated)                             |
| 958                                                                              | 99.3% un-methylated                                       | T (un-methylated)                           | 99.8% un-methylated                                       | T (un-methylated)                             |
| 960                                                                              | 97.8% un-methylated                                       | T (un-methylated)                           | 98.6% un-methylated                                       | T (un-methylated)                             |
| 962                                                                              | 99.3% un-methylated                                       | T (un-methylated)                           | 98.8% un-methylated                                       | T (un-methylated)                             |
| 964                                                                              | 98.9% un-methylated                                       | T (un-methylated)                           | 98.6% un-methylated                                       | T (un-methylated)                             |
| 965                                                                              | 98.9% un-methylated                                       | T (un-methylated)                           | 100% un-methylated                                        | T (un-methylated)                             |
| 972                                                                              | 99.2% un-methylated                                       | T (un-methylated)                           | 99.1% un-methylated                                       | T (un-methylated)                             |
| 981                                                                              | 99.5% un-methylated                                       | T (un-methylated)                           | 99.7% un-methylated                                       | T (un-methylated)                             |
| 983                                                                              | 98.2% un-methylated                                       | T (un-methylated)                           | 97.8% un-methylated                                       | T (un-methylated)                             |
| 984                                                                              | 100% un-methylated                                        | T (un-methylated)                           | 100% un-methylated                                        | T (un-methylated)                             |
| 985                                                                              | 98.4% un-methylated                                       | T (un-methylated)                           | 98.6% un-methylated                                       | T (un-methylated)                             |
| 987                                                                              | 96.1% un-methylated                                       | T (un-methylated)                           | 98.4% un-methylated                                       | T (un-methylated)                             |
| 990                                                                              | 99.5% un-methylated                                       | T (un-methylated)                           | 99.2% un-methylated                                       | T (un-methylated)                             |
| 992                                                                              | 99.0% un-methylated                                       | T (un-methylated)                           | 98.2% un-methylated                                       | T (un-methylated)                             |
| 996                                                                              | 99.2% un-methylated                                       | T (un-methylated)                           | 98.9% un-methylated                                       | T (un-methylated)                             |
| 1003                                                                             | 98.3% un-methylated                                       | T (un-methylated)                           | 96.9% un-methylated                                       | T (un-methylated)                             |
| 1015                                                                             | 98.0% un-methylated                                       | T (un-methylated)                           | 98.4% un-methylated                                       | T (un-methylated)                             |
| 1017                                                                             | 98.4% un-methylated                                       | T (un-methylated)                           | 99.6% un-methylated                                       | T (un-methylated)                             |
| 1019                                                                             | 98.8% un-methylated                                       | T (un-methylated)                           | 98.8% un-methylated                                       | T (un-methylated)                             |
| 1024                                                                             | 98.4% un-methylated                                       | T (un-methylated)                           | 99.1% un-methylated                                       | T (un-methylated)                             |
| 1026                                                                             | 99.2% un-methylated                                       | T (un-methylated)                           | 96.6% un-methylated                                       | T (un-methylated)                             |
| 1036                                                                             | 98.1% un-methylated                                       | T (un-methylated)                           | 99.5% un-methylated                                       | T (un-methylated)                             |
| 1039                                                                             | 98.5% un-methylated                                       | T (un-methylated)                           | 99.0% un-methylated                                       | T (un-methylated)                             |
| 1048                                                                             | 98.2% un-methylated                                       | T (un-methylated)                           | 95.7% un-methylated                                       | T (un-methylated)                             |
| 1051                                                                             | 96.9% un-methylated                                       | T (un-methylated)                           | 98.7% un-methylated                                       | T (un-methylated)                             |
| 1053                                                                             | 98.1% un-methylated                                       | T (un-methylated)                           | 98.7% un-methylated                                       | T (un-methylated)                             |
| 1054                                                                             | 98.1% un-methylated                                       | T (un-methylated)                           | 99.3% un-methylated                                       | T (un-methylated)                             |
| 1063                                                                             | 97.7% un-methylated                                       | T (un-methylated)                           | 100% un-methylated                                        | T (un-methylated)                             |
| 1066                                                                             | 97.5% un-methylated                                       | T (un-methylated)                           | 100% un-methylated                                        | T (un-methylated)                             |
| 1070                                                                             | 96.0% un-methylated                                       | T (un-methylated)                           | 100% un-methylated                                        | T (un-methylated)                             |
| 1072                                                                             | 98.0% un-methylated                                       | T (un-methylated)                           | 100% un-methylated                                        | T (un-methylated)                             |
| 1078                                                                             | 92.5% un-methylated                                       | T (un-methylated)                           | 100% un-methylated                                        | T (un-methylated)                             |
| 1080                                                                             | 93.7% un-methylated                                       | T (un-methylated)                           | 100% un-methylated                                        | T (un-methylated)                             |
| 1082                                                                             | 91.7% un-methylated                                       | T (un-methylated)                           | 100% un-methylated                                        | T (un-methylated)                             |
| 1085                                                                             | 90.9% un-methylated                                       | T (un-methylated)                           | 100% un-methylated                                        | T (un-methylated)                             |
| 1086                                                                             | 93.9% un-methylated                                       | T (un-methylated)                           | 100% un-methylated                                        | T (un-methylated)                             |

**Table 2k**

| Methylation site<br>Primer set 15<br>(436-806bp)<br>CONTIG796042<br>_275-1136-650 | Status in next generation<br>sequencing data<br>Sample 12 | Peak in Sanger sequencing data Sample<br>12 | Status in next generation<br>sequencing data<br>Sample 27 | Status in Sanger sequencing data<br>Sample 27 |
|-----------------------------------------------------------------------------------|-----------------------------------------------------------|---------------------------------------------|-----------------------------------------------------------|-----------------------------------------------|
| 545                                                                               | 100% un-methylated                                        | T (un-methylated)                           | 100% un-methylated                                        | T (un-methylated)                             |
| 573                                                                               | 100% un-methylated                                        | T (un-methylated)                           | 100% un-methylated                                        | T (un-methylated)                             |
| 581                                                                               | 100% un-methylated                                        | T (un-methylated)                           | 100% un-methylated                                        | T (un-methylated)                             |
| 582                                                                               | 100% un-methylated                                        | T (un-methylated)                           | 100% un-methylated                                        | T (un-methylated)                             |
| 584                                                                               | 63.0% un-methylated                                       | ~50% T (un-methylated)/50% C                | 56% un-methylated                                         | ~50% T (un-methylated)/50% C                  |
| 594                                                                               | 100% un-methylated                                        | T (un-methylated)                           | 96.2% un-methylated                                       | T (un-methylated)                             |
| 601                                                                               | 96.3% un-methylated                                       | T (un-methylated)                           | 100% un-methylated                                        | T (un-methylated)                             |
| 603                                                                               | 50.0% un-methylated                                       | ~50% T (un-methylated)/50% C                | 53.9% un-methylated                                       | ~50% T (un-methylated)/50% C                  |
| 614                                                                               | 100% un-methylated                                        | T (un-methylated)                           | 100% un-methylated                                        | T (un-methylated)                             |
| 619                                                                               | 100% un-methylated                                        | T (un-methylated)                           | 100% un-methylated                                        | T (un-methylated)                             |
| 621                                                                               | 100% un-methylated                                        | T (un-methylated)                           | 100% un-methylated                                        | T (un-methylated)                             |
| 627                                                                               | 100% un-methylated                                        | T (un-methylated)                           | 100% un-methylated                                        | T (un-methylated)                             |
| 630                                                                               | 100% un-methylated                                        | T (un-methylated)                           | 100% un-methylated                                        | T (un-methylated)                             |
| 632                                                                               | 100% un-methylated                                        | T (un-methylated)                           | 100% un-methylated                                        | T (un-methylated)                             |
| 635                                                                               | 100% un-methylated                                        | T (un-methylated)                           | 100% un-methylated                                        | T (un-methylated)                             |
| 639                                                                               | 100% un-methylated                                        | T (un-methylated)                           | 100% un-methylated                                        | T (un-methylated)                             |
| 641                                                                               | 100% un-methylated                                        | T (un-methylated)                           | 100% un-methylated                                        | T (un-methylated)                             |
| 646                                                                               | 100% un-methylated                                        | T (un-methylated)                           | 100% un-methylated                                        | T (un-methylated)                             |
| 655                                                                               | 100% un-methylated                                        | T (un-methylated)                           | 100% un-methylated                                        | T (un-methylated)                             |
| 661                                                                               | 100% un-methylated                                        | T (un-methylated)                           | 100% un-methylated                                        | T (un-methylated)                             |
| 670                                                                               | 100% un-methylated                                        | T (un-methylated)                           | 83.3% un-methylated                                       | T (un-methylated)                             |
| 677                                                                               | 100% un-methylated                                        | T (un-methylated)                           | 100% un-methylated                                        | T (un-methylated)                             |
| 680                                                                               | 100% un-methylated                                        | T (un-methylated)                           | 100% un-methylated                                        | T (un-methylated)                             |
| 687                                                                               | 100% un-methylated                                        | T (un-methylated)                           | 100% un-methylated                                        | T (un-methylated)                             |
| 696                                                                               | 98.3% un-methylated                                       | T (un-methylated)                           | 98.4% un-methylated                                       | T (un-methylated)                             |
| 698                                                                               | 96.7% un-methylated                                       | T (un-methylated)                           | 96.9% un-methylated                                       | T (un-methylated)                             |
| 699                                                                               | 98.3% un-methylated                                       | T (un-methylated)                           | 98.5% un-methylated                                       | T (un-methylated)                             |
| 705                                                                               | 96.5% un-methylated                                       | T (un-methylated)                           | 100% un-methylated                                        | T (un-methylated)                             |
| 710                                                                               | 97.7% un-methylated                                       | T (un-methylated)                           | 95.5% un-methylated                                       | T (un-methylated)                             |
| 712                                                                               | 98.9% un-methylated                                       | T (un-methylated)                           | 98.9% un-methylated                                       | T (un-methylated)                             |
| 716                                                                               | 94.6% un-methylated                                       | T (un-methylated)                           | 100% un-methylated                                        | T (un-methylated)                             |
| 719                                                                               | 99.0% un-methylated                                       | T (un-methylated)                           | 100% un-methylated                                        | T (un-methylated)                             |
| 735                                                                               | 100% un-methylated                                        | T (un-methylated)                           | 99.3% un-methylated                                       | T (un-methylated)                             |
| 741                                                                               | 97.9% un-methylated                                       | T (un-methylated)                           | 99.3% un-methylated                                       | T (un-methylated)                             |

**Table 2a-k. Methylation site validation data.** Observations from the Sanger sequencing output generated for the 12°C sample (supplementary figure 5). These methylation sites were originally identified in the next generation sequencing data that was derived from enriched bisulfite treated DNA and sites extend across 10 of the methylation array extended bait probe sequences. This data outlines the validation of these methylation sites at individual cytosine residues.

| Type                    | Number of reads | Percentage of total (%) | Brenchley <i>et al.</i> Percentage of total (%) | Percentage of sites methylated (%) |
|-------------------------|-----------------|-------------------------|-------------------------------------------------|------------------------------------|
| <b>DNA transposons</b>  | <b>1408443</b>  | <b>23.669</b>           | <b>18.691</b>                                   | <b>25.184</b>                      |
| Helitron                | 2319            | 0.039                   | 0.303                                           | 22.549                             |
| TIR                     | 1403070         | 23.579                  | 18.311                                          | 25.249                             |
| HAT                     | 1034            | 0.017                   | 0.052                                           | 23.323                             |
| Harbinger               | 73350           | 1.233                   | 0.427                                           | 27.952                             |
| Mariner                 | 140677          | 2.364                   | 0.128                                           | 20.533                             |
| CACTA                   | 1082075         | 18.185                  | 15.995                                          | 25.455                             |
| Mutator                 | 105743          | 1.777                   | 0.557                                           | 18.413                             |
| Unknown                 | 191             | 0.003                   | 0.011                                           | 41.791                             |
| Unknown                 | 3054            | 0.051                   | 0.077                                           | 19.403                             |
| <b>Retrotransposons</b> | <b>4235099</b>  | <b>71.172</b>           | <b>79.779</b>                                   | <b>23.289</b>                      |
| SINE                    | 151             | 0.003                   | 0.005                                           | 0*                                 |
| LINE                    | 297416          | 4.998                   | 1.026                                           | 21.152                             |
| LTR                     | 3937532         | 66.172                  | 78.748                                          | 23.452                             |
| Gypsy                   | 2815602         | 47.317                  | 44.034                                          | 23.312                             |
| Copia                   | 940479          | 15.805                  | 17.394                                          | 22.666                             |
| Unknown                 | 181451          | 3.049                   | 1.490                                           | 34.035                             |
| <b>Unknown</b>          | <b>306946</b>   | <b>5.158</b>            | <b>1.530</b>                                    | <b>33.443</b>                      |
|                         | <b>5950488</b>  |                         |                                                 |                                    |

**Table 3. Repeat composition of the 12°C sample's unmapped sequencing reads.** Enriched sequencing reads from the 12°C sample that did not map to the reference sequence (non-bisulfite treated) were aligned to the TREP repeat database using BLASTN<sup>1</sup> (E-value lower than 1e-5) and the number of read matches are detailed here with the % of the total transposon database hit. The same analysis performed by Brenchley *et al.*<sup>3</sup> on non-enriched wheat is also shown. Enriched sequencing reads from the 12°C sample that did not map to the reference sequence (bisulfite treated) were mapped to the TREP repeat database using Bismark<sup>4</sup> to allow calculation of the average % methylation for each transposon type i.e. the proportion of mapped reads that showed methylation across all cytosine sites. \*Less than 5X coverage for analysis.

|                                       | Sample 12 |           |           | Sample 27 |           |           |
|---------------------------------------|-----------|-----------|-----------|-----------|-----------|-----------|
| <b>Uni-Genome Methylation</b>         | <b>A</b>  | <b>B</b>  | <b>D</b>  | <b>A</b>  | <b>B</b>  | <b>D</b>  |
| Transcribed (%)                       | 78        | 78        | 80        | 78        | 77        | 80        |
| % CpG methylation                     | 71.5      | 70.6      | 74.1      | 71.5      | 69.0      | 73.0      |
| % CHH methylation                     | 19.6      | 16.8      | 17.9      | 19.9      | 17.6      | 18.4      |
| % CHG methylation                     | 8.9       | 12.6      | 8.0       | 8.6       | 13.4      | 8.6       |
| Not Transcribed (%)                   | 22        | 22        | 20        | 22        | 23        | 20        |
| % CpG methylation                     | 61.2      | 54.4      | 66.7      | 58.2      | 53.1      | 68.6      |
| % CHH methylation                     | 16.8      | 20.3      | 10.1      | 17.5      | 21.3      | 9.5       |
| % CHG methylation                     | 22.0      | 25.3      | 23.2      | 24.3      | 25.6      | 21.9      |
| <b>Bi-Genome Methylation</b>          | <b>BD</b> | <b>AD</b> | <b>AB</b> | <b>BD</b> | <b>AD</b> | <b>AB</b> |
| Transcribed (%)                       | 77        | 77        | 76        | 77        | 77        | 77        |
| % CpG methylation                     | 80.7      | 84.3      | 77.5      | 81.2      | 84.4      | 76.4      |
| % CHH methylation                     | 10.0      | 10.7      | 11.4      | 10.9      | 10.4      | 12.5      |
| % CHG methylation                     | 9.3       | 5.0       | 11.1      | 7.9       | 5.2       | 11.1      |
| Not Transcribed (%)                   | 23        | 23        | 24        | 23        | 23        | 23        |
| % CpG methylation                     | 63.2      | 61.6      | 57.4      | 66.5      | 61.6      | 58.0      |
| % CHH methylation                     | 8.6       | 15.0      | 11.5      | 8.3       | 15.6      | 10.5      |
| % CHG methylation                     | 28.2      | 23.4      | 31.1      | 25.2      | 22.8      | 31.5      |
| <b>Genome Independent Methylation</b> |           |           |           |           |           |           |
| Transcribed (%)                       |           | 73        |           |           | 73        |           |
| % CpG methylation                     |           | 96.3      |           |           | 96.3      |           |
| % CHH methylation                     |           | 1.2       |           |           | 1.2       |           |
| % CHG methylation                     |           | 2.5       |           |           | 2.5       |           |
| Not Transcribed (%)                   |           | 27        |           |           | 27        |           |
| % CpG methylation                     |           | 59.4      |           |           | 59.5      |           |
| % CHH methylation                     |           | 6.0       |           |           | 5.4       |           |
| % CHG methylation                     |           | 34.6      |           |           | 35.1      |           |

**Table 4. Summary of orientation of the methylation sites that were analyzed in the 12°C and 27°C samples.** Breakdown of methylation into uni-, bi- and tri-genome sites; transcribed (exon/intron) and non-transcribed regions and finally CpG, CHH and CHG sites.

| GOID            | Description                                                   | Level | P value  | GOID            | Description                                                   | Level | P value  |
|-----------------|---------------------------------------------------------------|-------|----------|-----------------|---------------------------------------------------------------|-------|----------|
| <b>Genome A</b> |                                                               |       |          | <b>Genome A</b> |                                                               |       |          |
| GO:0009605      | response to external stimulus                                 | 2     | 0.0026   | GO:0006950      | response to stress                                            | 2     | 0.018    |
| GO:0009991      | response to extracellular stimulus                            | 3     | 0.0026   | GO:0033554      | cellular response to stress                                   | 4     | 0.020    |
| GO:0031668      | cellular response to extracellular stimulus                   | 4     | 0.0026   | GO:0009605      | response to external stimulus                                 | 2     | 0.0022   |
| GO:0071496      | cellular response to external stimulus                        | 3     | 0.0026   | GO:0009991      | response to extracellular stimulus                            | 3     | 0.0007   |
| GO:0000045      | autophagic vacuole assembly                                   | 8     | 4.09e-05 | GO:0031668      | cellular response to extracellular stimulus                   | 4     | 0.0007   |
| GO:0006914      | autophagy                                                     | 4     | 0.0022   | GO:0071496      | cellular response to external stimulus                        | 3     | 0.0007   |
| GO:0007033      | vacuole organization                                          | 4     | 4.09e-05 | GO:0000045      | autophagic vacuole assembly                                   | 8     | 5.77e-06 |
| GO:0009267      | cellular response to starvation                               | 6     | 4.09e-05 | GO:0006914      | autophagy                                                     | 4     | 0.001    |
| GO:0016236      | macroautophagy                                                | 7     | 4.09e-05 | GO:0007033      | vacuole organization                                          | 4     | 5.77e-06 |
| GO:0031667      | response to nutrient levels                                   | 4     | 4.09e-05 | GO:0009267      | cellular response to starvation                               | 6     | 5.77e-06 |
| GO:0031669      | cellular response to nutrient levels                          | 5     | 4.09e-05 | GO:0016236      | macroautophagy                                                | 7     | 5.77e-06 |
| GO:0042594      | response to starvation                                        | 5     | 4.09e-05 | GO:0031667      | response to nutrient levels                                   | 4     | 5.77e-06 |
| GO:0070925      | organelle assembly                                            | 4     | 0.005    | GO:0031669      | cellular response to nutrient levels                          | 5     | 5.77e-06 |
| GO:0003854      | 3-beta-hydroxy-delta5-steroid dehydrogenase activity          | 6     | 0.012    | GO:0042594      | response to starvation                                        | 5     | 5.77e-06 |
| GO:0016229      | steroid dehydrogenase activity                                | 3     | 0.015    | GO:0070925      | organelle assembly                                            | 4     | 0.0006   |
| GO:0033764      | steroid dehydrogenase activity                                | 5     | 0.015    | GO:0017070      | U6 snRNA binding                                              | 6     | 0.013    |
| GO:0006694      | steroid biosynthetic process                                  | 5     | 0.020    | GO:0003755      | peptidyl-prolyl cis-trans isomerase activity                  | 4     | 0.016    |
| GO:0008202      | steroid metabolic process                                     | 4     | 0.034    | GO:0016859      | cis-trans isomerase activity                                  | 3     | 0.016    |
| <b>Genome B</b> |                                                               |       |          | <b>Genome B</b> |                                                               |       |          |
| GO:0001871      | pattern binding                                               | 2     | 1.39e-05 | GO:0005575      | cellular_component                                            | 0     | 0.009    |
| GO:0003824      | catalytic activity                                            | 1     | 0.0004   | GO:0003824      | catalytic activity                                            | 1     | 0.003    |
| GO:0004028      | 3-chloroallyl aldehyde dehydrogenase activity                 | 5     | 0.002    | GO:0017057      | 6-phosphogluconolactonase activity                            | 5     | 2.20e-18 |
| GO:0004029      | aldehyde dehydrogenase (NAD) activity                         | 5     | 2.45e-05 | GO:0052689      | carboxylic ester hydrolase activity                           | 4     | 0.007    |
| GO:0004030      | aldehyde dehydrogenase [NAD(P)+] activity                     | 5     | 2.71e-05 | GO:0009719      | response to endogenous stimulus                               | 2     | 0.0002   |
| GO:0004812      | aminoacyl-tRNA ligase activity                                | 5     | 0.017    | GO:0009725      | response to hormone stimulus                                  | 4     | 0.0002   |
| GO:0004830      | tryptophan-tRNA ligase activity                               | 6     | 2.73e-05 | GO:0010033      | response to organic substance                                 | 3     | 0.0002   |
| GO:0006418      | tRNA aminoacylation for protein translation                   | 10    | 0.050    | GO:0042221      | response to chemical stimulus                                 | 2     | 0.0024   |
| GO:0006436      | tryptophanyl-tRNA aminoacylation                              | 11    | 2.73e-05 | GO:0006810      | transport                                                     | 3     | 0.0009   |
| GO:0006633      | fatty acid biosynthetic process                               | 9     | 0.043    | GO:0051179      | localization                                                  | 1     | 0.0006   |
| GO:0008375      | acetylglucosaminyltransferase activity                        | 5     | 0.0069   | GO:0051234      | establishment of localization                                 | 2     | 0.0009   |
| GO:0008802      | betaine-aldehyde dehydrogenase activity                       | 6     | 0.022    | GO:0000178      | exosome (RNase complex)                                       | 5     | 0.026    |
| GO:0008974      | phosphoribulokinase activity                                  | 5     | 0.050    | GO:0004812      | aminoacyl-tRNA ligase activity                                | 5     | 0.005    |
| GO:0009832      | plant-type cell wall biogenesis                               | 5     | 0.035    | GO:0004830      | tryptophan-tRNA ligase activity                               | 6     | 0.0008   |
| GO:0009976      | tocopherol cyclase activity                                   | 3     | 0.050    | GO:0016875      | ligase activity, forming carbon-oxygen bonds                  | 3     | 0.005    |
| GO:0010215      | cellulose microfibril organization                            | 7     | 0.035    | GO:0016876      | ligase activity, forming aminoacyl-tRNA and related compounds | 4     | 0.005    |
| GO:0016021      | integral to membrane                                          | 4     | 0.0003   | GO:0006082      | organic acid metabolic process                                | 4     | 0.016    |
| GO:0016049      | cell growth                                                   | 3     | 0.035    | GO:0006418      | tRNA aminoacylation for protein translation                   | 10    | 0.0087   |
| GO:0016875      | ligase activity, forming carbon-oxygen bonds                  | 3     | 0.017    | GO:0006436      | tryptophanyl-tRNA aminoacylation                              | 11    | 0.0008   |
| GO:0016876      | ligase activity, forming aminoacyl-tRNA and related compounds | 4     | 0.017    | GO:0019752      | carboxylic acid metabolic process                             | 6     | 0.016    |
| GO:0017057      | 6-phosphogluconolactonase activity                            | 5     | 6.49e-12 | GO:0043038      | amino acid activation                                         | 8     | 0.010    |
| GO:0030198      | extracellular matrix organization                             | 4     | 0.035    | GO:0043039      | tRNA aminoacylation                                           | 9     | 0.010    |
| GO:0030247      | polysaccharide binding                                        | 3     | 1.39e-05 | GO:0043436      | oxoacid metabolic process                                     | 5     | 0.016    |
| GO:0031224      | intrinsic to membrane                                         | 3     | 5.17e-06 | GO:0044281      | small molecule metabolic process                              | 3     | 0.025    |
| GO:0031225      | anchored to membrane                                          | 4     | 0.045    | GO:0016020      | membrane                                                      | 1     | 2.01e-06 |
| GO:0031369      | translation initiation factor binding                         | 3     | 0.0065   | GO:0016021      | integral to membrane                                          | 4     | 1.14e-09 |
| GO:0040007      | growth                                                        | 1     | 0.035    | GO:0031224      | intrinsic to membrane                                         | 3     | 4.98e-11 |
| GO:0043062      | extracellular structure organization                          | 3     | 0.035    | GO:0044425      | membrane part                                                 | 2     | 3.51e-07 |
| GO:0044425      | membrane part                                                 | 2     | 0.0099   | GO:0008375      | acetylglucosaminyltransferase activity                        | 5     | 7.22e-05 |
| GO:0044765      | single-organism transport                                     | 4     | 0.0029   | GO:0044765      | single-organism transport                                     | 4     | 2.02e-07 |
| GO:0050269      | coniferyl-aldehyde dehydrogenase activity                     | 6     | 0.022    | GO:0055085      | transmembrane transport                                       | 5     | 1.51e-07 |
| GO:0055085      | transmembrane transport                                       | 5     | 0.004    | GO:0005509      | calcium ion binding                                           | 5     | 0.008    |
| GO:0070726      | cell wall assembly                                            | 5     | 0.035    | GO:0022857      | transmembrane transporter activity                            | 2     | 0.019    |
| GO:0071668      | plant-type cell wall assembly                                 | 6     | 0.035    | GO:0001871      | pattern binding                                               | 2     | 0.016    |
| GO:0072330      | monocarboxylic acid biosynthetic process                      | 8     | 0.0003   | GO:0030247      | polysaccharide binding                                        | 3     | 0.016    |
| GO:0009672      | auxin:hydrogen symporter activity                             | 7     | 0.011    | GO:0009672      | auxin:hydrogen symporter activity                             | 7     | 1.23e-   |

|                 |                                                                      |    |          |                 |                                                               |    |          |    |
|-----------------|----------------------------------------------------------------------|----|----------|-----------------|---------------------------------------------------------------|----|----------|----|
| GO:0042393      | histone binding                                                      | 3  | 0.049    | GO:0022804      | active transmembrane transporter activity                     | 3  | 0.0009   | 05 |
| GO:0006631      | fatty acid metabolic process                                         | 8  | 0.043    | GO:0080161      | auxin transmembrane transporter activity                      | 4  | 0.002    |    |
| GO:0072351      | tricarboxylic acid biosynthetic process                              | 8  | 0.043    | GO:0015399      | primary active transmembrane transporter activity             | 4  | 0.025    |    |
| GO:0042401      | cellular biogenic amine biosynthetic process                         | 7  | 0.043    | GO:0015405      | P-P-bond-hydrolysis-driven transmembrane transporter activity | 5  | 0.025    |    |
| GO:0032787      | monocarboxylic acid metabolic process                                | 7  | 0.013    | GO:0003743      | translation initiation factor activity                        | 6  | 0.0024   |    |
| GO:0030417      | nicotianamine metabolic process                                      | 8  | 0.043    | GO:0031369      | translation initiation factor binding                         | 3  | 0.0002   |    |
| GO:0030418      | nicotianamine biosynthetic process                                   | 9  | 0.043    | GO:0080014      | thalianol hydroxylase activity                                | 4  | 0.044    |    |
| GO:0009309      | amine biosynthetic process                                           | 5  | 0.027    | GO:0016763      | transferase activity, transferring pentosyl groups            | 4  | 0.0012   |    |
| GO:0030410      | nicotianamine synthase activity                                      | 4  | 0.043    | GO:0030410      | nicotianamine synthase activity                               | 4  | 0.0009   |    |
| GO:0006082      | organic acid metabolic process                                       | 4  | 0.013    | GO:0009309      | amine biosynthetic process                                    | 5  | 0.0025   |    |
| GO:0019752      | carboxylic acid metabolic process                                    | 6  | 0.013    | GO:0030417      | nicotianamine metabolic process                               | 8  | 0.0009   |    |
| GO:0043038      | amino acid activation                                                | 8  | 0.013    | GO:0030418      | nicotianamine biosynthetic process                            | 9  | 0.0009   |    |
| GO:0043039      | tRNA aminoacylation                                                  | 9  | 0.013    | GO:0032787      | monocarboxylic acid metabolic process                         | 7  | 0.0054   |    |
| GO:0043436      | oxoacid metabolic process                                            | 5  | 0.013    | GO:0042401      | cellular biogenic amine biosynthetic process                  | 7  | 0.0054   |    |
| GO:0044281      | small molecule metabolic process                                     | 3  | 0.011    | GO:0072330      | monocarboxylic acid biosynthetic process                      | 8  | 1.37e-05 |    |
| GO:0016020      | Membrane                                                             | 1  | 0.011    | GO:0072350      | tricarboxylic acid metabolic process                          | 7  | 0.00997  |    |
| GO:0009664      | plant-type cell wall organization                                    | 5  | 0.024    | GO:0072351      | tricarboxylic acid biosynthetic process                       | 8  | 0.0009   |    |
| GO:0022607      | cellular component assembly                                          | 3  | 0.023    | GO:0006631      | fatty acid metabolic process                                  | 8  | 0.027    |    |
| GO:0071669      | plant-type cell wall organization or biogenesis                      | 4  | 0.024    | GO:0006633      | fatty acid biosynthetic process                               | 9  | 0.0050   |    |
| GO:0003743      | translation initiation factor activity                               | 6  | 0.011    | GO:0009976      | tocopherol cyclase activity                                   | 3  | 0.0094   |    |
| GO:0080014      | thalianol hydroxylase activity                                       | 4  | 0.023    |                 |                                                               |    |          |    |
| <b>Genome D</b> |                                                                      |    |          | <b>Genome D</b> |                                                               |    |          |    |
| GO:0004470      | malic enzyme activity                                                | 5  | 0.041    | GO:0008661      | 1-deoxy-D-xylulose-5-phosphate synthase activity              | 4  | 0.043    |    |
| GO:0005385      | zinc ion transmembrane transporter activity                          | 8  | 2.07e-06 | GO:0016744      | transferase activity, transferring aldehyde or ketonic groups | 3  | 0.043    |    |
| GO:0006829      | zinc ion transport                                                   | 9  | 2.07e-06 | GO:0005385      | zinc ion transmembrane transporter activity                   | 8  | 0.015    |    |
| GO:0008641      | small protein activating enzyme activity                             | 2  | 0.038    | GO:0006829      | zinc ion transport                                            | 9  | 0.0001   |    |
| GO:0008661      | 1-deoxy-D-xylulose-5-phosphate synthase activity                     | 4  | 0.0008   | GO:0071577      | zinc ion transmembrane transport                              | 10 | 0.0001   |    |
| GO:0009070      | serine family amino acid biosynthetic process                        | 9  | 0.049    | GO:0008107      | galactoside 2-alpha-L-fucosyltransferase activity             | 7  | 0.00496  |    |
| GO:0016619      | malate dehydrogenase (oxaloacetate-decarboxylating) activity         | 6  | 0.041    | GO:0031127      | alpha-(1,2)-fucosyltransferase activity                       | 6  | 0.00496  |    |
| GO:0016744      | transferase activity, transferring aldehyde or ketonic groups        | 3  | 0.0008   |                 |                                                               |    |          |    |
| GO:0019725      | cellular homeostasis                                                 | 4  | 0.041    |                 |                                                               |    |          |    |
| GO:0045454      | cell redox homeostasis                                               | 5  | 0.035    |                 |                                                               |    |          |    |
| GO:0055085      | transmembrane transport                                              | 5  | 0.035    |                 |                                                               |    |          |    |
| GO:0071577      | zinc ion transmembrane transport                                     | 10 | 2.07e-06 |                 |                                                               |    |          |    |
| GO:0019948      | SUMO activating enzyme activity                                      | 3  | 0.031    |                 |                                                               |    |          |    |
| GO:0015036      | disulfide oxidoreductase activity                                    | 4  | 0.038    |                 |                                                               |    |          |    |
| GO:0034220      | ion transmembrane transport                                          | 6  | 0.050    |                 |                                                               |    |          |    |
| GO:0004473      | malate dehydrogenase (oxaloacetate-decarboxylating) (NADP+) activity | 6  | 0.031    |                 |                                                               |    |          |    |
| GO:0016652      | oxidoreductase activity, acting on NAD(P)H, NAD(P) as acceptor       | 4  | 0.031    |                 |                                                               |    |          |    |

**Table 5. GO enrichment analysis of the uni-genome specific methylated sites in the 12°C and 27°C sample.** Detailing only hits with a p value below 0.05. This analysis was carried out using GOEAST<sup>5</sup> default parameters and uni-genome methylated sites.

**Sample 12**

| Contig                     | Start | End  | P-value   | q-value   | Meth diff    | Annotation                                                                                           | Allelic expression (%) |
|----------------------------|-------|------|-----------|-----------|--------------|------------------------------------------------------------------------------------------------------|------------------------|
| <b>A specific</b>          |       |      |           |           |              |                                                                                                      |                        |
| CONTIG49504_435-2661-96    | 1     | 2227 | 2.73E-07  | 8.24E-07  | -28.92473118 | -                                                                                                    | 43.53                  |
| CONTIG877188_586-1075-0    | 1     | 490  | 1.29E-30  | 1.90E-29  | -38.90009323 | -                                                                                                    | 20.5                   |
| CONTIG63925_1458-2011-3    | 1     | 554  | 1.75E-20  | 1.55E-19  | -25.03384615 | -                                                                                                    | 21.38                  |
| CONTIG4081708_1-354-206    | 1     | 354  | 0.005155  | 0.008763  | -37.23554302 | -                                                                                                    | 17.28                  |
| CONTIG3633726_1-451-211    | 1     | 451  | 3.65E-167 | 7.97E-165 | -27.79594131 | -                                                                                                    | 32.78                  |
| CONTIG249042_123-339-5     | 1     | 217  | 6.46E-73  | 3.37E-71  | -44.31627082 | -                                                                                                    | 0                      |
| CONTIG215709_279-1230-809  | 1     | 952  | 3.19E-16  | 2.03E-15  | -30.50964187 | <i>T. aestivum</i> cytosolic acetyl-CoA carboxylase (Acc-2) GO:0006084                               | 27.26                  |
| CONTIG1858325_1-731-245    | 1     | 731  | 9.84E-126 | 1.36E-123 | -28.30525544 | <i>B. distachyon</i> phospholipase D alpha 2-like GO:0006629                                         | 26.44                  |
| CONTIG1597600_1-795-228    | 1     | 795  | 2.07E-14  | 1.17E-13  | -28.85330579 | <i>B. distachyon</i> translation factor GUF1 homolog, GO:0044238                                     | 0                      |
| CONTIG1115628_3-966-261    | 1     | 964  | 1.73E-07  | 5.34E-07  | -50.71428571 | <i>B. distachyon</i> chaperone protein ClpB1-like GO:0019538                                         | 0                      |
| CONTIG108019_1166-2348-58  | 1     | 1183 | 0         | 0         | -36.07309364 | -                                                                                                    | 10.91                  |
| <b>B specific</b>          |       |      |           |           |              |                                                                                                      |                        |
| CONTIG00003_659-1045-148   | 1     | 387  | 3.92E-12  | 1.82E-11  | -32.31442577 | -                                                                                                    | 44.62                  |
| CONTIG138549_1886-2081-70  | 1     | 196  | 3.67E-50  | 9.57E-49  | -62.74428117 | -                                                                                                    | 24.72                  |
| CONTIG196191_1067-1943-293 | 1     | 877  | 2.60E-05  | 6.19E-05  | -26.35820896 | <i>B. distachyon</i> GDSL esterase/lipase At5g45910-like GO:0008152                                  | 38.9                   |
| CONTIG2087988_1-680-139    | 1     | 680  | 1.06E-11  | 4.74E-11  | -43.78571429 | -                                                                                                    | 45.65                  |
| CONTIG26480_1-3308-1357    | 1     | 3308 | 2.57E-06  | 7.03E-06  | -34.16149068 | <i>B. distachyon</i> probable WRKY TF2 GO:0043565                                                    | 39.17                  |
| CONTIG2973374_1-533-8      | 1     | 533  | 1.99E-59  | 7.05E-58  | -25.49531202 | -                                                                                                    | 17.94                  |
| CONTIG3001146_161-528-21   | 1     | 368  | 7.87E-45  | 1.75E-43  | -46.64797862 | <i>B. distachyon</i> protochlorophyllide-dependent translocon component 52, chloroplastic GO:0016020 | 38.87                  |
| CONTIG319969_1148-1500-157 | 1     | 353  | 1.93E-14  | 1.06E-13  | -29.98905619 | <i>T. aestivum</i> cytosolic acetyl-CoA carboxylase (Acc-2) GO:0006084                               | 25.82                  |
| CONTIG3486724_1-470-37     | 1     | 470  | 0         | 0         | -25.42447689 | -                                                                                                    | 51.68                  |
| CONTIG373148_620-1553-214  | 1     | 934  | 3.32E-178 | 8.26E-176 | -29.81705025 | -                                                                                                    | 0                      |
| CONTIG428214_513-1473-246  | 1     | 961  | 1.65E-12  | 7.90E-12  | -30.57077142 | <i>A. tauschii</i> chr 1D prolamin gene                                                              | 31.22                  |
| CONTIG673866_387-1225-49   | 1     | 839  | 3.05E-08  | 1.04E-07  | -28.07017544 | <i>B. distachyon</i> probable AMP deaminase GO:0046033                                               | 24.5                   |
| CONTIG757329_1-1158-925    | 1     | 1158 | 2.76E-65  | 1.07E-63  | -26.7148409  | -                                                                                                    | 16.48                  |
| CONTIG813109_1-1124-479    | 1     | 1124 | 1.53E-58  | 5.29E-57  | -33.67509943 | <i>B. distachyon</i> glucan endo-1,3-beta-glucosidase 13-like GO:0005975                             | 35.14                  |
| CONTIG824282_1-1115-596    | 1     | 1115 | 7.02E-51  | 1.92E-49  | -37.78481013 | <i>B. distachyon</i> probable ADP,ATP carrier protein At5g56450 GO:0016020                           | 17.93                  |
| <b>D Specific</b>          |       |      |           |           |              |                                                                                                      |                        |
| CONTIG1193128_1-935-683    | 1     | 935  | 1.06E-254 | 1.17E-251 | 29.74587245  | <i>H. vulgare</i> GDP dissociation inhibitor protein GO:0015031                                      | 62.99                  |
| CONTIG1751784_353-562-86   | 1     | 210  | 4.08E-197 | 1.64E-194 | 36.00680107  | <i>B. distachyon</i> 14 kDa zinc-binding protein GO:0008270                                          | 52.09                  |
| CONTIG375096_1213-1553-0   | 1     | 341  | 5.06E-29  | 6.98E-28  | 27.98136646  | -                                                                                                    | 22.71                  |
| CONTIG614988_638-844-39    | 1     | 207  | 5.47E-38  | 1.12E-36  | 47.59872751  | -                                                                                                    | 33.59                  |

**Sample 27**

|                           |   |      |           |           |              |                                                                                             |       |
|---------------------------|---|------|-----------|-----------|--------------|---------------------------------------------------------------------------------------------|-------|
| <b>A specific</b>         |   |      |           |           |              |                                                                                             |       |
| CONTIG108019_1166-2348-58 | 1 | 1183 | 0         | 0         | -34.89162823 | -                                                                                           | 12.11 |
| CONTIG1597600_1-795-228   | 1 | 795  | 3.57E-13  | 1.89E-12  | -33.38197147 | <i>B. distachyon</i> translation factor GUF1 homolog, GO:0044238                            | 29.0  |
| CONTIG1719967_1-764-545   | 1 | 764  | 0.004379  | 0.00742   | -52.74193548 | <i>B. distachyon</i> type I inositol 1,4,5-trisphosphate 5-phosphatase CVP2-like GO:0044238 | 16.8  |
| CONTIG249042_123-339-5    | 1 | 217  | 3.03E-181 | 1.13E-178 | -38.79016651 | -                                                                                           | 0     |
| CONTIG3633726_1-451-211   | 1 | 451  | 1.73E-173 | 5.55E-171 | -26.35552405 | -                                                                                           | 36.69 |
| CONTIG4421068_1-276-58    | 1 | 276  | 1.56E-52  | 4.89E-51  | -27.60867817 | -                                                                                           | 38.6  |
| CONTIG877188_586-1075-0   | 1 | 490  | 1.47E-45  | 3.52E-44  | -39.41975601 | -                                                                                           | 33.35 |
| <b>B specific</b>         |   |      |           |           |              |                                                                                             |       |
| CONTIG00003_659-1045-148  | 1 | 387  | 9.77E-18  | 6.99E-17  | -37.29165498 | -                                                                                           | 42.6  |
| CONTIG02453_4291-4580-91  | 1 | 290  | 9.71E-28  | 1.13E-26  | -34.62911286 | <i>A. tauschii</i> chr 1D prolamin gene                                                     | 46.50 |
| CONTIG02614_251-513-95    | 1 | 263  | 2.33E-11  | 1.11E-10  | -67.19298246 | <i>T. turgidum</i> subsp. durum ethylene response factor 1 GO:0003677                       | 8.9   |

|                            |   |      |           |           |              |                                                                                                         |       |
|----------------------------|---|------|-----------|-----------|--------------|---------------------------------------------------------------------------------------------------------|-------|
| CONTIG144730_1-2152-1688   | 1 | 2152 | 4.45E-26  | 4.89E-25  | -31.83300079 | <i>B. distachyon</i> protein argonaute 16<br>GO:0003676                                                 | 37.51 |
| CONTIG2150797_1-584-52     | 1 | 584  | 0.004420  | 0.00809   | -31.20292341 | -                                                                                                       | 24.95 |
| CONTIG26480_1-3308-1357    | 1 | 3308 | 2.48E-06  | 7.38E-06  | -32.27029438 | <i>B. distachyon</i> probable WRKY TF2<br>GO:0043565                                                    | 39.15 |
| CONTIG277654_1158-1728-159 | 1 | 571  | 5.57E-13  | 2.98E-12  | -25.11293434 | -                                                                                                       | 51.18 |
| CONTIG2857336_1-546-308    | 1 | 546  | 2.15E-11  | 1.03E-10  | -25.60346719 | <i>H. vulgare</i> mRNA for alpha-amylase (AMY4)<br>GO:0008152                                           | 36.80 |
| CONTIG2973374_1-533-8      | 1 | 533  | 6.98E-87  | 4.54E-85  | -25.9856896  | -                                                                                                       | 25.05 |
| CONTIG3001146_161-528-21   | 1 | 368  | 2.55E-66  | 1.03E-64  | -50.67333671 | <i>B. distachyon</i> protochlorophyllide-dependent translocon component 52, chloroplastic<br>GO:0016020 | 35.52 |
| CONTIG319969_1148-1500-157 | 1 | 353  | 7.65E-24  | 7.46E-23  | -35.74198918 | <i>T. aestivum</i> cytosolic acetyl-CoA carboxylase (Acc-2)<br>GO:0006084                               | 37.06 |
| CONTIG323708_1-1634-424    | 1 | 1634 | 4.55E-14  | 2.64E-13  | -32.30392157 | <i>B. distachyon</i> HUA2-like protein 3                                                                | 33.28 |
| CONTIG373148_620-1553-214  | 1 | 934  | 2.69E-172 | 6.51E-170 | -31.58419025 | -                                                                                                       | 32.43 |
| CONTIG428214_513-1473-246  | 1 | 961  | 2.89E-15  | 1.82E-14  | -26.96503903 | <i>A. tauschii</i> chr 1D prolamin gene                                                                 | 41.06 |
| CONTIG4457809_1-269-105    | 1 | 269  | 1.64E-13  | 9.15E-13  | -47.82608696 | -                                                                                                       | 31.9  |
| CONTIG813109_1-1124-479    | 1 | 1124 | 1.55E-53  | 4.57E-52  | -30.74169514 | <i>B. distachyon</i> glucan endo-1,3-beta-glucosidase 13-like<br>GO:0005975                             | 37.08 |
| CONTIG824282_1-1115-596    | 1 | 1115 | 9.10E-54  | 2.71E-52  | -30.07764939 | <i>B. distachyon</i> ADP,ATP carrier protein At5g56450<br>GO:0016020                                    | 26.96 |
| CONTIG84713_1604-1852-0    | 1 | 249  | 8.91E-21  | 7.61E-20  | -27.58804963 | <i>B. distachyon</i> GDSL esterase/lipase<br>GO:0008152                                                 | 24.77 |
| <b>D specific</b>          |   |      |           |           |              |                                                                                                         |       |
| CONTIG00797_3966-6492-400  | 1 | 2527 | 2.90E-06  | 7.97E-06  | 70.58823529  | -                                                                                                       | 31.47 |
| CONTIG1193128_1-935-683    | 1 | 935  | 2.17E-244 | 1.39E-241 | 29.65690412  | <i>H. vulgare</i> GDP dissociation inhibitor protein<br>GO:0015031                                      | 55.66 |
| CONTIG1751784_353-562-86   | 1 | 210  | 6.59E-267 | 9.84E-264 | 45.388214    | <i>B. distachyon</i> 14 kDa zinc-binding protein<br>GO:0008270                                          | 52.59 |
| CONTIG2340265_1-633-13     | 1 | 633  | 7.84E-86  | 6.27E-84  | 29.48601399  | -                                                                                                       | 55.56 |
| CONTIG614988_638-844-39    | 1 | 207  | 7.75E-59  | 3.02E-57  | 51.82180958  | -                                                                                                       | 41.41 |

**Table 6. Differentially methylated regions identified per extended bait probe sequence in the 12°C and 27°C samples.** Detailing only regions that were identified by methylkit<sup>2</sup> with a q value <0.01 using the Fishers exact test. The three sub-genomes of wheat were compared and regions were selected if hypermethylated by a minimum of 25% in a single genome when compared to the other two.



| <b>Genome A average allelic expression</b> |       | <b>T value</b> | <b>DF (degrees of freedom)</b> | <b>P value</b> |
|--------------------------------------------|-------|----------------|--------------------------------|----------------|
| Transcribed versus Promoter                |       | 5.6207         | 8370                           | <0.0001        |
| 22.33                                      | 17.12 |                |                                |                |
| <b>Genome B average allelic expression</b> |       |                |                                |                |
| Transcribed versus Promoter                |       | 2.4488         | 8370                           | 0.0144         |
| 22.25                                      | 19.87 |                |                                |                |
| <b>Genome D average allelic expression</b> |       |                |                                |                |
| Transcribed versus Promoter                |       | 3.1696         | 8370                           | 0.0015         |
| 23.46                                      | 20.39 |                |                                |                |
| <b>Genome A average methylation</b>        |       |                |                                |                |
| Transcribed versus Promoter                |       | 0.5798         | 8370                           | 0.5621         |
| 7.65                                       | 7.95  |                |                                |                |
| <b>Genome B average methylation</b>        |       |                |                                |                |
| Transcribed versus Promoter                |       | 1.6314         | 8370                           | 0.1028         |
| 7.85                                       | 8.73  |                |                                |                |
| <b>Genome D average methylation</b>        |       |                |                                |                |
| Transcribed versus Promoter                |       | 1.7829         | 8370                           | 0.0746         |
| 7.62                                       | 8.55  |                |                                |                |

**Table 7. Comparing methylation and gene expression between promoter and transcribed regions.** Percentage methylation per extended bait probe sequence was summarized for each sub-genome and for transcribed and promoter regions separately (calculated as number of methylated cytosine residues at standard thresholds as a proportion of all cytosine residues in that gene region). This methylation was correlated with the percentage allelic gene expression for that sequence. For all transcribed sites, and separately promoter regions, the average percentage methylation and the average allelic gene expression was calculated. Using the two-tailed t test these average values were then compared between transcribed and promoter regions per sub-genome.

**One-Sample Kolmogorov-Smirnov Test**

|                           |                        | Non-transcribed<br>Genome A GS | Non-transcribed<br>Genome B GS | Non-transcribed<br>Genome D GS | Transcribed<br>Genome A GS | Transcribed<br>Genome B GS |
|---------------------------|------------------------|--------------------------------|--------------------------------|--------------------------------|----------------------------|----------------------------|
| N                         |                        | 209                            | 308                            | 189                            | 824                        | 1295                       |
| Normal                    | Mean                   | 31.89039021119                 | 32.76789366048                 | 32.29609930114                 | 32.98216318007             | 34.08905409478             |
| Parameters <sup>a,b</sup> | Std.<br>Deviation      | 14.040896103150                | 14.755807346036                | 15.268315946523                | 11.588226295934            | 15.950353309142            |
|                           | Test Statistic         | .080                           | .130                           | .098                           | .047                       | .090                       |
|                           | Asymp. Sig. (2-tailed) | .002 <sup>c</sup>              | .000 <sup>c</sup>              | .000 <sup>c</sup>              | .000 <sup>c</sup>          | .000 <sup>c</sup>          |

|                           |                        | Transcribed Genome D<br>GS | Promoter Genome A<br>GS | Promoter Genome B<br>GS | Promoter Genome D<br>GS |
|---------------------------|------------------------|----------------------------|-------------------------|-------------------------|-------------------------|
| N                         |                        | 775                        | 23                      | 75                      | 47                      |
| Normal                    | Mean                   | 34.61251229354             | 32.9186207652           | 31.34310351073          | 28.44383925681          |
| Parameters <sup>a,b</sup> | Std.<br>Deviation      | 13.752502671752            | 12.74987733965          | 14.130415328627         | 16.470166484047         |
|                           | Test Statistic         | .081                       | .226                    | .139                    | .184                    |
|                           | Asymp. Sig. (2-tailed) | .000 <sup>c</sup>          | .004 <sup>c</sup>       | .001 <sup>c</sup>       | .000 <sup>c</sup>       |

|                           |                        | Non-transcribed<br>Genome A GI | Non-transcribed<br>Genome B GI | Non-transcribed<br>Genome D GI | Transcribed<br>Genome A GI | Transcribed<br>Genome B GI |
|---------------------------|------------------------|--------------------------------|--------------------------------|--------------------------------|----------------------------|----------------------------|
| N                         |                        | 3961                           | 3961                           | 3961                           | 11765                      | 11765                      |
| Normal                    | Mean                   | 32.1205                        | 34.6708                        | 33.2086                        | 32.8588                    | 32.6132                    |
| Parameters <sup>a,b</sup> | Std.<br>Deviation      | 13.58926                       | 16.05794                       | 13.22647                       | 12.44179                   | 13.35565                   |
|                           | Test Statistic         | .085                           | .096                           | .073                           | .056                       | .058                       |
|                           | Asymp. Sig. (2-tailed) | .000 <sup>c</sup>              | .000 <sup>c</sup>              | .000 <sup>c</sup>              | .000 <sup>c</sup>          | .000 <sup>c</sup>          |

|                           |                        | Transcribed Genome D<br>GI | Promoter Genome A<br>GI | Promoter Genome B<br>GI | Promoter Genome D<br>GI |
|---------------------------|------------------------|----------------------------|-------------------------|-------------------------|-------------------------|
| N                         |                        | 11765                      | 297                     | 297                     | 297                     |
| Normal                    | Mean                   | 34.5280                    | 33.6948                 | 32.5757                 | 33.7295                 |
| Parameters <sup>a,b</sup> | Std.<br>Deviation      | 12.00605                   | 11.02886                | 10.80612                | 12.66500                |
|                           | Test Statistic         | .048                       | .164                    | .107                    | .153                    |
|                           | Asymp. Sig. (2-tailed) | .000 <sup>c</sup>          | .000 <sup>c</sup>       | .000 <sup>c</sup>       | .000 <sup>c</sup>       |

|                           |                   | Non-transcribed<br>Genome A of AB<br>BI | Non-transcribed<br>Genome B of AB<br>BI | Non-transcribed<br>Genome A of AD<br>BI | Non-transcribed<br>Genome D of AD<br>BI | Non-transcribed<br>Genome B of BD<br>BI |
|---------------------------|-------------------|-----------------------------------------|-----------------------------------------|-----------------------------------------|-----------------------------------------|-----------------------------------------|
| N                         |                   | 257                                     | 257                                     | 289                                     | 289                                     | 263                                     |
| Normal                    | Mean              | 26.3140                                 | 30.1308                                 | 26.0618                                 | 29.5408                                 | 30.4244                                 |
| Parameters <sup>a,b</sup> | Std.<br>Deviation | 16.45025                                | 19.27955                                | 16.16357                                | 17.22703                                | 18.02270                                |

|                        |                   |                   |                   |                   |                   |
|------------------------|-------------------|-------------------|-------------------|-------------------|-------------------|
| Test Statistic         | .147              | .139              | .118              | .088              | .110              |
| Asymp. Sig. (2-tailed) | .000 <sup>c</sup> | .000 <sup>c</sup> | .000 <sup>c</sup> | .000 <sup>c</sup> | .000 <sup>c</sup> |

|                                        | Non-transcribed<br>Genome D of BD<br>BI | Transcribed<br>Genome A of AB<br>BI | Transcribed<br>Genome B of AB<br>BI | Transcribed<br>Genome A of AD<br>BI | Transcribed Genome<br>D of AD BI |
|----------------------------------------|-----------------------------------------|-------------------------------------|-------------------------------------|-------------------------------------|----------------------------------|
| N                                      | 263                                     | 733                                 | 733                                 | 1172                                | 1172                             |
| Normal Parameters <sup>a</sup><br>Mean | 31.2345                                 | 29.5347                             | 31.5945                             | 30.8400                             | 33.0460                          |
| Std. Deviation <sup>b</sup>            | 18.89392                                | 12.94182                            | 14.77129                            | 14.04560                            | 14.32645                         |
| Test Statistic                         | .111                                    | .053                                | .078                                | .065                                | .069                             |
| Asymp. Sig. (2-tailed)                 | .000 <sup>c</sup>                       | .000 <sup>c</sup>                   | .000 <sup>c</sup>                   | .000 <sup>c</sup>                   | .000 <sup>c</sup>                |

|                                          | Transcribed<br>Genome B of BD<br>BI | Transcribed<br>Genome D of<br>BD BI | Promoter<br>Genome A of<br>AB BI | Promoter<br>Genome B of<br>AB BI | Promoter<br>Genome A of AD<br>BI |
|------------------------------------------|-------------------------------------|-------------------------------------|----------------------------------|----------------------------------|----------------------------------|
| N                                        | 949                                 | 949                                 | 28                               | 28                               | 87                               |
| Normal Parameters <sup>a,b</sup><br>Mean | 28.3654                             | 33.0541                             | 31.5594                          | 37.1885                          | 31.0379                          |
| Std. Deviation                           | 15.28704                            | 16.35365                            | 6.75352                          | 11.64101                         | 12.63657                         |
| Test Statistic                           | .065                                | .080                                | .120                             | .128                             | .163                             |
| Asymp. Sig. (2-tailed)                   | .000 <sup>c</sup>                   | .000 <sup>c</sup>                   | .200 <sup>c,d</sup>              | .200 <sup>c,d</sup>              | .000 <sup>c</sup>                |

|                                          | Promoter Genome D<br>of AD BI | Promoter Genome B of<br>BD BI | Promoter Genome D of<br>BD BI |
|------------------------------------------|-------------------------------|-------------------------------|-------------------------------|
| N                                        | 87                            | 28                            | 28                            |
| Normal Parameters <sup>a,b</sup><br>Mean | 38.8841                       | 28.2124                       | 30.6353                       |
| Std. Deviation                           | 15.38425                      | 14.19112                      | 14.79252                      |
| Test Statistic                           | .224                          | .184                          | .192                          |
| Asymp. Sig. (2-tailed)                   | .000 <sup>c</sup>             | .016 <sup>c</sup>             | .010 <sup>c</sup>             |

- a. Test distribution is Normal.  
b. Calculated from data.  
c. Lilliefors Significance Correction.  
d. This is a lower bound of the true significance.

**Table 8. Testing gene expression distributions for normality.** Using the One-Sample Kolmogorov-Smirnov Test to test if distributions are normal in the raw data used in the plots from figure 3 i.e. allelic gene expression for each extended bait probe for tri-methylated (GI), bi-methylated (BI) and uni-methylated residues (GS). Data is further categorized as non-transcribed, promoter and transcribed regions.

| Methylation array extended bait probe | Position        | Gene annotation                         | Further annotation                                                                          | Transcription Factor binding sites                                                                                                                                                                                                  | Methylation difference (>=25%)                  |
|---------------------------------------|-----------------|-----------------------------------------|---------------------------------------------------------------------------------------------|-------------------------------------------------------------------------------------------------------------------------------------------------------------------------------------------------------------------------------------|-------------------------------------------------|
| CONTIG137059_838-2184-342             | 336             | -                                       | -                                                                                           | ABRE-like sequence (early responsive to dehydration)                                                                                                                                                                                | 39.06250                                        |
|                                       | CpG             |                                         |                                                                                             |                                                                                                                                                                                                                                     | S27 GA Increase Methylation                     |
| IWGSC_3B_10607568 (1186-2539)         | Non-transcribed |                                         |                                                                                             |                                                                                                                                                                                                                                     | S27 GA expression increase (0.688)              |
| CONTIG2568272_412-593-49              | 81              | GO:0016021<br>GO:0055085                | probable anion transporter 3                                                                | "EEC"; Consensus motif of enhancer elements, EE-1 and EE-2 in the promoter region of the Chlamydomonas Cah1 (periplasmic carbonic anhydrase); Binding site of Myb transcription factor LCR1                                         | 28.23529                                        |
|                                       | CpG             |                                         |                                                                                             |                                                                                                                                                                                                                                     | S27 GA Increase Methylation                     |
| IWGSC_3B_10690222 (1248-1429)         | exon            | Bradi2g55130.1                          |                                                                                             |                                                                                                                                                                                                                                     | S27 GA expression decrease (0.345)              |
| CONTIG4841059_1-183-8                 | 47              | Bradi1g31800.2                          | Hordeum vulgare mRNA for ROP binding kinases 1 (rbk1 gene)                                  | CAAT promoter consensus sequence                                                                                                                                                                                                    | 32.60870                                        |
|                                       | CpG             | GO:0005975<br>GO:0042132                |                                                                                             |                                                                                                                                                                                                                                     | S27 GA Increase Methylation                     |
| IWGSC_7BL_6749288 (1267-1449)         | exon            | GO:0042578                              | fructose 1,6-bisphosphate 1-phosphatase activity<br><br>phosphoric ester hydrolase activity |                                                                                                                                                                                                                                     | S27 GA expression decrease (0.40)               |
| CONTIG92594_726-1100-179              | 212             | -                                       | hypothetical protein VITISV_035985                                                          | "amylase box"; Conserved sequence found in 5'-upstream region of alpha-amylase gene of wheat                                                                                                                                        | 28.50409                                        |
|                                       | CHG             |                                         |                                                                                             |                                                                                                                                                                                                                                     | S27 GA Increase Methylation                     |
| IWGSC_3B_10607627 (2039-2413)         | Non-transcribed |                                         |                                                                                             | Binding site for at least two plant MYB proteins ATMYB1 and ATMYB2 (stress response)                                                                                                                                                | S27 GA expression increase (0.683)              |
| CONTIG102481_1825-2368-378            | 397             | Bradi5g10580.2                          | Oryza brachyantha ultraviolet-B receptor UVR8-like                                          | -                                                                                                                                                                                                                                   | 67.38095                                        |
|                                       | CpG             | phosphoinositide 5-phosphatase activity |                                                                                             |                                                                                                                                                                                                                                     | S27 GB Increase Methylation                     |
| IWGSC_2AL_6436497 (9073-9610)         | exon            |                                         | Zea mays putative regulator of chromosome condensation (RCC1)                               |                                                                                                                                                                                                                                     | S27 GB expression no significant change (0.578) |
| CONTIG152583_1-2108-119               | 150             | Bradi3g44310.2                          | nuclear hormone receptor binding, transcription coactivator activity                        | Binding site of rice WRKY71, a transcriptional repressor of the gibberellin signaling pathway (defense signaling);                                                                                                                  | 80.00000                                        |
|                                       | CHG             |                                         |                                                                                             |                                                                                                                                                                                                                                     | S27 GB Decrease Methylation                     |
| IWGSC_3AL_3468167 (1-678)             | promoter        |                                         | hydroxyproline-rich glycoprotein-like                                                       | "W-box" found in promoter of Arabidopsis thaliana (response to environmental stress)                                                                                                                                                | S27 GB expression increase (0.602)              |
| CONTIG2068663_2-684-0                 | 159             | Bradi1g58790.1                          | Triticum aestivum sucrose phosphate synthase II 3A gene                                     | Consensus sequence of PRE (plastid response element) in the promoters of HSP70A in Chlamydomonas; Involved in induction of HSP70A gene                                                                                              | 96.29630                                        |
|                                       | CpG             | (F-box)                                 |                                                                                             |                                                                                                                                                                                                                                     | S27 GB Increase Methylation                     |
| IWGSC_2AS_5290061 (3656-4339)         | Non-transcribed |                                         | F-box/FBD/LRR-repeat protein At1g16930-like isoform X1                                      |                                                                                                                                                                                                                                     | S27 GB expression increase (0.651)              |
| CONTIG2168894_1-665-369               | 313             | Bradi3g05740.1                          | probable small nuclear ribonucleoprotein F                                                  | -                                                                                                                                                                                                                                   | 91.11111                                        |
|                                       | 328             |                                         |                                                                                             |                                                                                                                                                                                                                                     | 94.11765                                        |
| IWGSC_6AS_4378555 (4847-5317)         | CHG             |                                         |                                                                                             |                                                                                                                                                                                                                                     | S27 GB Increase Methylation                     |
|                                       | Non-transcribed |                                         |                                                                                             |                                                                                                                                                                                                                                     | S27 GB expression increase (0.608)              |
| CONTIG2436882_1-615-227               | 257             | Bradi3g29420.1                          | Avena barbata isolate bar_19L_29 floricaula/leafy (FL) gene                                 | "GTGA motif" found in the promoter of the tobacco (N.t.) late pollen gene g10 which shows homology to pectate lyase                                                                                                                 | 32.21477                                        |
|                                       | CHG             |                                         |                                                                                             |                                                                                                                                                                                                                                     | 28.57143                                        |
| IWGSC_1DL_107119 (1926-2542)          | 294             |                                         | Triticum aestivum Wknox1d gene for KN1 homeobox                                             | Binding consensus sequence of Arabidopsis (A.t.) transcription factor, RAV1; RAV1 specifically binds to DNA with bipartite sequence motifs of RAV1-A (CAACA) and RAV1-B (CACCTG); RAV1 protein contain AP2-like and B3-like domains | S27 GB Decrease Methylation                     |
|                                       |                 |                                         |                                                                                             |                                                                                                                                                                                                                                     | S27 GB expression                               |

|                                  |                 |                                                                |                                                                  |                                                                                                                                                                                      |                                                 |
|----------------------------------|-----------------|----------------------------------------------------------------|------------------------------------------------------------------|--------------------------------------------------------------------------------------------------------------------------------------------------------------------------------------|-------------------------------------------------|
|                                  | CHH             |                                                                | protein                                                          |                                                                                                                                                                                      | increase (0.679)                                |
|                                  | Non-transcribed |                                                                | vacuolar protein sorting-associated protein 52 A-like isoform X3 |                                                                                                                                                                                      |                                                 |
| CONTIG3442468_1-478-72           | 79              | GO:0008168<br>GO:0032259<br>GO:0001510                         | Brachypodium distachyon rRNA methyltransferase 2                 | -                                                                                                                                                                                    | 63.63636                                        |
|                                  | CpG             |                                                                |                                                                  |                                                                                                                                                                                      | S27 GB Decrease Methylation                     |
| IWGSC_5DL_4577968 (3584-4062)    | exon            | Bradi1g03600.1 rRNA (uridine-2'-O-)-methyltransferase activity |                                                                  |                                                                                                                                                                                      | S27 GB expression no significant change (0.581) |
| CONTIG3940060_1-385-81           | 114             | Bradi5g03070.1                                                 | Wall-associated receptor kinase 1                                | -                                                                                                                                                                                    | 42.59259                                        |
|                                  | CpG             | WAK receptor-like protein kinase                               |                                                                  |                                                                                                                                                                                      | S27 GB Decrease Methylation                     |
| IWGSC_6BL_4386534 (4994-5382)    | Non-transcribed |                                                                |                                                                  |                                                                                                                                                                                      | S27 GB expression increase (0.664)              |
| CONTIG4492671_1-260-87           | 188             | GO:0003677<br>GO:0003682                                       | Triticum aestivum clone TaMYB64 MYB-related protein mRNA         | "CGACG element" found in the GC-rich regions of the rice (O.s.) Amy3D and Amy3E amylase genes, required for expression during sugar starvation                                       | 29.46429                                        |
|                                  | CpG             |                                                                |                                                                  |                                                                                                                                                                                      | S27 GB Decrease Methylation                     |
| IWGSC_7DL_3395927 (9706-9963)    | exon            |                                                                |                                                                  |                                                                                                                                                                                      | S27 GB expression no significant change (0.459) |
| CONTIG662333_155-1228-878        | 919             | -                                                              | probable metal-nicotianamine transporter YSL3                    | Consensus sequence of PRE (plastid response element) in the promoters of HSP70A in Chlamydomonas; enhancer within the Chlamydomonas HSP70A promoter                                  | 37.87831                                        |
|                                  | CHG             |                                                                |                                                                  |                                                                                                                                                                                      | S27 GB Increase Methylation                     |
| IWGSC_5BL_10899008 (1-1074)      | Non-transcribed |                                                                |                                                                  |                                                                                                                                                                                      | S27 GB expression no significant change (0.475) |
| CONTIG777882_204-523-0           | 125             | Bradi1g16030.1                                                 | Brachypodium distachyon transmembrane protein 230-like           | "GTGA motif" found in the promoter of the tobacco (N.t.) late pollen gene g10 which shows homology to pectate lyase hexamer motif of Arabidopsis thaliana (A.t.) histone H4 promoter | 36.67814                                        |
|                                  | CpG             |                                                                |                                                                  |                                                                                                                                                                                      | S27 GB Increase Methylation                     |
| IWGSC_7DL_3364770 (2562-2881)    | exon            |                                                                |                                                                  |                                                                                                                                                                                      | S27 GB expression no significant change (0.438) |
| CONTIG931153_1-1056-47           | 156             | -                                                              | -                                                                | ACGT sequence (from -155 to -152) required for etiolation-induced expression of erd1 (early responsive to dehydration) in Arabidopsis                                                | 37.19149                                        |
|                                  | CpG             |                                                                |                                                                  | "CGACG element" found in the GC-rich regions of the rice (O.s.) Amy3D and Amy3E amylase genes, expression during sugar starvation                                                    | S27 GB Increase Methylation                     |
| IWGSC_5AL_2746920 (5556-6612)    | Non-transcribed |                                                                |                                                                  |                                                                                                                                                                                      | S27 GB expression no significant change (0.55)  |
| CONTIG214056_1-1389-1044         | 1065            | Bradi1g00710.1                                                 | -                                                                | -                                                                                                                                                                                    | 90.72039                                        |
|                                  | CHH             |                                                                |                                                                  |                                                                                                                                                                                      | S27 GD Decrease Methylation                     |
| IWGSC_4AL_7177172 (58-788)       | exon            |                                                                |                                                                  |                                                                                                                                                                                      | S27 GD expression no significant change (0.532) |
| CONTIG223810_196-1857-1014       | 1066            | GO:0005515                                                     | Setaria italica MATH domain-containing protein At5g43560-like    | -                                                                                                                                                                                    | 28.37838                                        |
|                                  | CHG             | Bradi2g20420.1                                                 |                                                                  |                                                                                                                                                                                      | S27 GD Increase Methylation                     |
| IWGSC_1AL_3870255 (1389-1635)    | exon            |                                                                |                                                                  |                                                                                                                                                                                      | S27 GD expression no significant change (0.423) |
| CONTIG2367995_1-627-196          | 222             | GO:0005515                                                     | transducin family protein-like                                   | -                                                                                                                                                                                    | 72.02737                                        |
|                                  | CpG             | Bradi3g59200.5                                                 |                                                                  |                                                                                                                                                                                      | S27 GD Decrease Methylation                     |
| IWGSC_5BL_10875833 (11339-11962) | intron          | microtubule-severing ATPase activity                           |                                                                  |                                                                                                                                                                                      | S27 GD expression increase (0.623)              |

|                                 |                 |                                                      |                                                                              |                                                                                                                                                                                                                                                                                                                                                                                                                                                                                                                                                                                                                                                                                                                                                                                                                                                                                                    |                                                         |
|---------------------------------|-----------------|------------------------------------------------------|------------------------------------------------------------------------------|----------------------------------------------------------------------------------------------------------------------------------------------------------------------------------------------------------------------------------------------------------------------------------------------------------------------------------------------------------------------------------------------------------------------------------------------------------------------------------------------------------------------------------------------------------------------------------------------------------------------------------------------------------------------------------------------------------------------------------------------------------------------------------------------------------------------------------------------------------------------------------------------------|---------------------------------------------------------|
| CONTIG2384711_304-626-85        | 175             | GO:0003677<br>GO:0003682                             | Triticum aestivum clone TaMYB48 MYB-related protein mRNA                     | -                                                                                                                                                                                                                                                                                                                                                                                                                                                                                                                                                                                                                                                                                                                                                                                                                                                                                                  | 80.66378                                                |
|                                 | CpG             | Bradi3g57300.1                                       |                                                                              |                                                                                                                                                                                                                                                                                                                                                                                                                                                                                                                                                                                                                                                                                                                                                                                                                                                                                                    | S27 GD Decrease Methylation                             |
| IWGSC_3DL_6941321 (4426-4748)   | exon            | MYB-related transcription factor                     |                                                                              |                                                                                                                                                                                                                                                                                                                                                                                                                                                                                                                                                                                                                                                                                                                                                                                                                                                                                                    | S27 GD expression decrease (0.331)                      |
| CONTIG3689890_1-445-186         | 330             | Bradi3g46380.1                                       | nuclear hormone receptor binding                                             | Motif (IVD) found in the Chlamydomonas (C.R.) Nia1 gene promoter; Located between -51 and -42; Involved in Nia1 transcription repression;                                                                                                                                                                                                                                                                                                                                                                                                                                                                                                                                                                                                                                                                                                                                                          | 98.76543                                                |
|                                 | CpG             |                                                      |                                                                              |                                                                                                                                                                                                                                                                                                                                                                                                                                                                                                                                                                                                                                                                                                                                                                                                                                                                                                    | S27 GD Decrease Methylation                             |
| IWGSC_6AL_5759538 (4304-4748)   | exon            |                                                      |                                                                              |                                                                                                                                                                                                                                                                                                                                                                                                                                                                                                                                                                                                                                                                                                                                                                                                                                                                                                    | S27 GD expression no significant change (0.551)         |
| CONTIG4491143_1-259-65          | 152             | GO:0005515<br>GO:0000156<br>GO:0000160<br>GO:0006355 | Two-component response regulator-like PRR95                                  | "GATA box"; GATA motif in CaMV 35S promoter; Binding with ASF-2; Three GATA box repeats were found in the promoter of Petunia (P.h.) chlorophyll a/b binding protein, Cab22 gene; Required for high level, light regulated, and tissue specific expression; Conserved in the promoter of all LHCl1 type I Cab genes;                                                                                                                                                                                                                                                                                                                                                                                                                                                                                                                                                                               | 99.14530                                                |
|                                 | CpG             |                                                      |                                                                              |                                                                                                                                                                                                                                                                                                                                                                                                                                                                                                                                                                                                                                                                                                                                                                                                                                                                                                    | S27 GD Decrease Methylation                             |
| IWGSC_4BS_4961544 (10329-10587) | exon            | Bradi4g24970.1                                       |                                                                              |                                                                                                                                                                                                                                                                                                                                                                                                                                                                                                                                                                                                                                                                                                                                                                                                                                                                                                    | S27 GD expression decrease (0.39)                       |
| CONTIG571468_1-251-70           | 136             | -                                                    | -                                                                            | ACGT sequence (from -155 to -152) required for etiolation-induced expression of erd1 (early responsive to dehydration) in Arabidopsis; "ASF-1 binding site" in CaMV 35S promoter; ASF-1 binds to two TGACG motifs; See S000023 (AS1); Found in HBP-1 binding site of wheat histone H3 gene; TGACG motifs are found in many promoters and are involved in transcriptional activation of several genes; Binding site of tobacco TGA1a; TGA1a and b show homology to CREB; TGA6 is a new member of the TGA family; Abiotic and biotic stress differentially stimulate "as-1 element" activity; MYC recognition site found in the promoters of the dehydration-responsive gene rd22 and many other genes in Arabidopsis; MYC recognition sequence in CBF3 promoter; Binding site of ICE1 (inducer of CBF expression 1) that regulates the transcription of CBF/DREB1 genes in the cold in Arabidopsis; | 30.34483                                                |
|                                 | CHG             |                                                      |                                                                              |                                                                                                                                                                                                                                                                                                                                                                                                                                                                                                                                                                                                                                                                                                                                                                                                                                                                                                    | 31.79567                                                |
| IWGSC_7DL_3362089 (12358-12610) | 170             |                                                      |                                                                              |                                                                                                                                                                                                                                                                                                                                                                                                                                                                                                                                                                                                                                                                                                                                                                                                                                                                                                    | S27 GD Decrease Methylation                             |
|                                 | CpG             |                                                      |                                                                              |                                                                                                                                                                                                                                                                                                                                                                                                                                                                                                                                                                                                                                                                                                                                                                                                                                                                                                    | S27 GD expression no significant change (0.484)         |
|                                 | Non-transcribed |                                                      |                                                                              |                                                                                                                                                                                                                                                                                                                                                                                                                                                                                                                                                                                                                                                                                                                                                                                                                                                                                                    |                                                         |
| CONTIG70475_1-2644-366          | 519             | GO:0005515                                           | Oryza brachyantha conserved oligomeric Golgi complex subunit 6-like          | -                                                                                                                                                                                                                                                                                                                                                                                                                                                                                                                                                                                                                                                                                                                                                                                                                                                                                                  | 43.19338                                                |
|                                 | CpG             | Bradi1g69350.1                                       |                                                                              |                                                                                                                                                                                                                                                                                                                                                                                                                                                                                                                                                                                                                                                                                                                                                                                                                                                                                                    | S27 GD Decrease Methylation                             |
| IWGSC_4BL_7034792 (3065-5681)   | Non-transcribed |                                                      |                                                                              |                                                                                                                                                                                                                                                                                                                                                                                                                                                                                                                                                                                                                                                                                                                                                                                                                                                                                                    | S27 GD expression decrease (0.251)                      |
| CONTIG125368_377-2245-335       | 391             | GO:0005515                                           | Brachypodium distachyon C2 and GRAM domain-containing protein At1g03370-like | -                                                                                                                                                                                                                                                                                                                                                                                                                                                                                                                                                                                                                                                                                                                                                                                                                                                                                                  | 66.70455                                                |
|                                 | CpG             | Bradi4g35300.2                                       |                                                                              |                                                                                                                                                                                                                                                                                                                                                                                                                                                                                                                                                                                                                                                                                                                                                                                                                                                                                                    | S27 GBD Increase Methylation                            |
| IWGSC_5DL_4586742 (5929-7798)   | exon            |                                                      |                                                                              |                                                                                                                                                                                                                                                                                                                                                                                                                                                                                                                                                                                                                                                                                                                                                                                                                                                                                                    | S27 GBD expression decrease (0.432,0.363)               |
| CONTIG4026253_1-366-203         | 227             | Bradi2g09180.1                                       | Brachypodium distachyon zinc finger CCCH domain-containing protein 4         | "EEC"; Consensus motif of the two enhancer elements, EE-1 and EE-2, both found in the promoter region of the Chlamydomonas Cah1 (encoding a periplasmic carbonic anhydrase); Binding site of Myb transcription factor LCR1                                                                                                                                                                                                                                                                                                                                                                                                                                                                                                                                                                                                                                                                         | 33.70536                                                |
|                                 | CpG             |                                                      |                                                                              |                                                                                                                                                                                                                                                                                                                                                                                                                                                                                                                                                                                                                                                                                                                                                                                                                                                                                                    | S27 GBD Decrease Methylation                            |
| IWGSC_3AS_1032975 (2392-2760)   | exon            |                                                      |                                                                              |                                                                                                                                                                                                                                                                                                                                                                                                                                                                                                                                                                                                                                                                                                                                                                                                                                                                                                    | S27 GBD expression no significant change (0.582,0.576)  |
| CONTIG1084855_1-982-10          | 91              | -                                                    | Brachypodium distachyon cell division control protein 48 homolog B           | "ASF-1 binding site" in CaMV 35S promoter; ASF-1 binds to two TGACG motifs; Found in HBP-1 binding site of wheat histone H3 gene; TGACG motifs are found in many promoters and are involved in transcriptional activation of several genes by auxin and/or salicylic acid; Binding site of tobacco TGA1a; TGA1a and b show homology to CREB; TGA6 is a new member of the TGA family; Abiotic DE and biotic stress differentially stimulate "as-1 element" activity;                                                                                                                                                                                                                                                                                                                                                                                                                                | 43.13697                                                |
|                                 | CpG             |                                                      |                                                                              |                                                                                                                                                                                                                                                                                                                                                                                                                                                                                                                                                                                                                                                                                                                                                                                                                                                                                                    | S27 GAD Decrease Methylation                            |
| IWGS_2DL_9902343 (3242-4223)    | intron          |                                                      |                                                                              |                                                                                                                                                                                                                                                                                                                                                                                                                                                                                                                                                                                                                                                                                                                                                                                                                                                                                                    | S27 GAD expression increase A, decrease D (0.654,0.298) |
| CONTIG2057528_1-683-348         | 403             | Bradi1g46200.2                                       | -                                                                            | -                                                                                                                                                                                                                                                                                                                                                                                                                                                                                                                                                                                                                                                                                                                                                                                                                                                                                                  | 69.04762                                                |
|                                 |                 |                                                      |                                                                              |                                                                                                                                                                                                                                                                                                                                                                                                                                                                                                                                                                                                                                                                                                                                                                                                                                                                                                    | 67.07317                                                |
| IWGSC_7BS_3135887 (223-909)     | CpG             |                                                      |                                                                              |                                                                                                                                                                                                                                                                                                                                                                                                                                                                                                                                                                                                                                                                                                                                                                                                                                                                                                    | S27 GAD Increase Methylation                            |
|                                 | exon            |                                                      |                                                                              |                                                                                                                                                                                                                                                                                                                                                                                                                                                                                                                                                                                                                                                                                                                                                                                                                                                                                                    | S27 GAD expression no significant change (0.599,0.455)  |

|                                 |                 |                                                        |                                                                       |                                                                                                                                                                                                                                                                                                                                                                                                                                                                                                                             |                                                                  |
|---------------------------------|-----------------|--------------------------------------------------------|-----------------------------------------------------------------------|-----------------------------------------------------------------------------------------------------------------------------------------------------------------------------------------------------------------------------------------------------------------------------------------------------------------------------------------------------------------------------------------------------------------------------------------------------------------------------------------------------------------------------|------------------------------------------------------------------|
| CONTIG3738166_1-430-225         | 120             | Bradi5g16520.2                                         | Brachypodium distachyon RNA-binding protein 25                        | "GATA box"; GATA motif in CaMV 35S promoter; Binding with ASF-2; Three GATA box repeats were found in the promoter of Petunia (P.h.) chlorophyll a/b binding protein, Cab22 gene; Required for high level, light regulated, and tissue specific expression; Conserved in the promoter of all LHClI type I Cab genes;                                                                                                                                                                                                        | 27.06560                                                         |
| IWGSC_2AL_1438962 (2343-2418)   | 123             | GTPase activity                                        |                                                                       |                                                                                                                                                                                                                                                                                                                                                                                                                                                                                                                             | 31.93486                                                         |
|                                 | 189             |                                                        |                                                                       | "I box"; "L-box"; Conserved sequence upstream of light-regulated genes; Conserved sequence upstream of light-regulated genes of both monocots and dicots;                                                                                                                                                                                                                                                                                                                                                                   | 26.44538                                                         |
|                                 | 192             |                                                        |                                                                       |                                                                                                                                                                                                                                                                                                                                                                                                                                                                                                                             | 25.22903                                                         |
|                                 | CHH             |                                                        |                                                                       |                                                                                                                                                                                                                                                                                                                                                                                                                                                                                                                             | S27 GAD Increase Methylation                                     |
|                                 | Non-transcribed |                                                        |                                                                       |                                                                                                                                                                                                                                                                                                                                                                                                                                                                                                                             | S27 GAD expression decrease A, no change D (0.391,0.593)         |
| CONTIG3871251_1-404-195         | 266             | -                                                      | Oryza brachyantha outer envelope protein 64                           | -                                                                                                                                                                                                                                                                                                                                                                                                                                                                                                                           | 53.59053                                                         |
|                                 | CpG             |                                                        |                                                                       |                                                                                                                                                                                                                                                                                                                                                                                                                                                                                                                             | S27 GAD Decrease Methylation                                     |
| IWGSC_6DL_3261298 (13492-13896) | intron          |                                                        |                                                                       |                                                                                                                                                                                                                                                                                                                                                                                                                                                                                                                             | S27 GAD expression increase (0.65,0.647)                         |
| CONTIG1291249_1-890-554         | 649             | -                                                      | -                                                                     | -                                                                                                                                                                                                                                                                                                                                                                                                                                                                                                                           | 96.33508                                                         |
| IWGSC_5DS_2746720 (3146-4036)   | CpG             |                                                        |                                                                       |                                                                                                                                                                                                                                                                                                                                                                                                                                                                                                                             | S27 GD Decrease methylation                                      |
|                                 | Non-transcribed |                                                        |                                                                       |                                                                                                                                                                                                                                                                                                                                                                                                                                                                                                                             | S27 GD expression no significant change (0.461)                  |
| CONTIG01055_4511-5766-1087      | 1111            | Bradi1g57700.1                                         | Prunus mume L-type lectin-domain containing receptor kinase IV.1-like | Core site required for binding of Dof proteins in maize (Z.m.); Dof proteins are DNA binding proteins, with presumably only one zinc finger, and are unique to plants; Four cDNAs encoding Dof proteins, Dof1, Dof2, Dof3 and PBF, have been isolated from maize; PBF is an endosperm specific Dof protein that binds to prolamin box; Maize Dof1 enhances transcription from the promoters of both cytosolic orthophosphate kinase (CyPPDK) and a non-photosynthetic PEPC gene; Maize Dof2 suppressed the C4PEPC promoter; | 28.91156                                                         |
| IWGSC_6AL_5772087 (1642-2897)   | CpG             | lectin-like receptor kinase, putative, subfamily L-LEC |                                                                       |                                                                                                                                                                                                                                                                                                                                                                                                                                                                                                                             | S27 GAB Decrease Methylation                                     |
|                                 | exon            |                                                        |                                                                       |                                                                                                                                                                                                                                                                                                                                                                                                                                                                                                                             | S27 GAB expression increase A, no change B (0.687,0.569)         |
| CONTIG143939_1-546-4            | 42              | Bradi1g44440.1                                         | GTPase activity                                                       | -                                                                                                                                                                                                                                                                                                                                                                                                                                                                                                                           | 93.45794                                                         |
| IWGSC_7AS_4242229 (1366-1911)   | CpG             |                                                        |                                                                       |                                                                                                                                                                                                                                                                                                                                                                                                                                                                                                                             | S27 GABD Increase Methylation                                    |
|                                 | intron          |                                                        |                                                                       |                                                                                                                                                                                                                                                                                                                                                                                                                                                                                                                             | S27 GABD expression no change AB, increase D (0.592,0.528,0.634) |
| CONTIG972406_1-1026-744         | 762             | -                                                      | -                                                                     | -                                                                                                                                                                                                                                                                                                                                                                                                                                                                                                                           | 93.33333                                                         |
| IWGSC_6AS_4362220 (4607-5638)   | CpG             |                                                        |                                                                       |                                                                                                                                                                                                                                                                                                                                                                                                                                                                                                                             | S27 GABD Decrease Methylation                                    |
|                                 | Non-transcribed |                                                        |                                                                       |                                                                                                                                                                                                                                                                                                                                                                                                                                                                                                                             | S27 GABD expression increase (0.621,0.704,0.821)                 |

**Table 9. Differentially methylated sites between the 12°C and 27°C samples.** Detailing every site where a  $\geq 25\%$  difference in methylation has been recorded in 1 or more sub-genomes between the 2 samples

| Contig                    | Start | End  | P-value  | q-value   | Meth diff s27 | Expression s27     | Composition              | Annotation                                             |
|---------------------------|-------|------|----------|-----------|---------------|--------------------|--------------------------|--------------------------------------------------------|
| <b>B specific</b>         |       |      |          |           |               |                    |                          |                                                        |
| CONTIG2390219_1-624-493   | 1     | 624  | 9.86e-05 | 4.15e-03  | -31.70        | Decreased<br>0.229 | Unknown/ Non-transcribed | -                                                      |
| CONTIG705587_1-1199-151   | 1     | 1199 | 9.70e-06 | 5.02e-04  | -65.67        | Increased<br>0.718 | Transcribed              | <i>B. distachyon</i> acyltransferase-like protein      |
| CONTIG800659_1-1122-96    | 1     | 1122 | 4.47e-30 | 2.57e-027 | -28.86        | Increased<br>0.667 | Unknown/Non-transcribed  | <i>Ae. tauschii</i> chromosome 1Ds prolamin gene locus |
| <b>D Specific</b>         |       |      |          |           |               |                    |                          |                                                        |
| CONTIG138549_1886-2081-70 | 1     | 196  | 1.25e-46 | 9.53e-44  | -58.12        | No change<br>0.49  | Transcribed              | <i>B. distachyon</i> 54S ribosomal protein L51         |

**Table 10. Differentially methylated regions identified per extended bait probe sequence between the 12°C and 27°C samples.** Detailing only regions that were identified by methylkit<sup>2</sup> with a q value <0.01 and a  $\geq$  25% difference in methylation using the Fishers exact test. The three sub-genomes of wheat were compared between the 12°C and 27°C samples and regions were selected if differentially methylated by a minimum of 25% in a single genome when compared to the other sample.



| Extended bait probe        | Position                 | Gene annotation                                                                                                                                                                                                                                                                                                                                                                                                                                                                                                                       | PPLR value            | Gene expression phenotype (sample 27)              | Methylation status (sample 27) | Transcribed/Non-transcribed |
|----------------------------|--------------------------|---------------------------------------------------------------------------------------------------------------------------------------------------------------------------------------------------------------------------------------------------------------------------------------------------------------------------------------------------------------------------------------------------------------------------------------------------------------------------------------------------------------------------------------|-----------------------|----------------------------------------------------|--------------------------------|-----------------------------|
| CONTIG137059_838-2184-342  | 336                      | ABRE-like sequence (early responsive to dehydration) TF                                                                                                                                                                                                                                                                                                                                                                                                                                                                               | 0.688                 | Up-regulation                                      | Hyper-methylated genome A      | Non-transcribed             |
| CONTIG2568272_412-593-49   | 81                       | GO:0016021 GO:0055085<br>Bradi2g55130.1 probable anion transporter 3<br>Binding site of Myb transcription factor LCR1                                                                                                                                                                                                                                                                                                                                                                                                                 | 0.345                 | Down-regulation                                    | Hyper-methylated genome A      | Transcribed                 |
| CONTIG4841059_1-183-8      | 47                       | Bradi1g31800.2<br>GO:0005975 GO:0042132 GO:0042578 fructose 1,6-bisphosphate 1-phosphatase activity                                                                                                                                                                                                                                                                                                                                                                                                                                   | 0.40                  | Down-regulation                                    | Hyper-methylated genome A      | Transcribed                 |
| CONTIG92594_726-1100-179   | 212                      | "amylase box"; Conserved sequence found in 5'-upstream region of alpha-amylase gene of wheat<br>Binding site for at least two plant MYB proteins ATMYB1 and ATMYB2 (stress response)                                                                                                                                                                                                                                                                                                                                                  | 0.683                 | Up-regulation                                      | Hyper-methylated genome A      | Non-transcribed             |
| CONTIG152583_1-2108-119    | 150                      | Bradi3g44310.2<br>Binding site of rice WRKY71, a transcriptional repressor of the gibberellin signaling pathway (defense signaling); "W-box" found in promoter of Arabidopsis thaliana                                                                                                                                                                                                                                                                                                                                                | 0.602                 | Up-regulation                                      | Hypo-methylated genome B       | Promoter                    |
| CONTIG2068663_2-684-0      | 159                      | Bradi1g58790.1 (F-box)<br>F-box/FBD/LRR-repeat protein At1g16930-like isoform X1                                                                                                                                                                                                                                                                                                                                                                                                                                                      | 0.651                 | Up-regulation                                      | Hyper-methylated genome B      | Non-transcribed             |
| CONTIG2168894_1-665-369    | 313                      | Bradi3g05740.1<br>probable small nuclear ribonucleoprotein F                                                                                                                                                                                                                                                                                                                                                                                                                                                                          | 0.608                 | Up-regulation                                      | Hyper-methylated genome B      | Non-transcribed             |
| CONTIG2436882_1-615-227    | 257<br>294               | Bradi3g29420.1<br>Avena barbata isolate bar_19L_29 floricaula/leafy gene                                                                                                                                                                                                                                                                                                                                                                                                                                                              | 0.679                 | Up-regulation                                      | Hypo-methylated genome B       | Non-transcribed             |
| CONTIG3940060_1-385-81     | 114                      | Bradi5g03070.1<br>WAK receptor-like protein kinase                                                                                                                                                                                                                                                                                                                                                                                                                                                                                    | 0.664                 | Up-regulation                                      | Hypo-methylated genome B       | Non-transcribed             |
| CONTIG2367995_1-627-196    | 222                      | GO:0005515<br>Bradi3g59200.5<br>microtubule-severing ATPase activity<br>transducin family protein-like                                                                                                                                                                                                                                                                                                                                                                                                                                | 0.623                 | Up-regulation                                      | Hypo-methylated genome D       | Transcribed                 |
| CONTIG2384711_304-626-85   | 175                      | GO:0003677 GO:0003682<br>Bradi3g57300.1<br>MYB-related transcription factor<br>Triticum aestivum clone TaMYB48 MYB-related protein mRNA                                                                                                                                                                                                                                                                                                                                                                                               | 0.331                 | Down-regulation                                    | Hypo-methylated genome D       | Transcribed                 |
| CONTIG4491143_1-259-65     | 152                      | GO:0005515 GO:0000156<br>GO:0000160 GO:0006355<br>Bradi4g24970.1<br>Two-component response regulator-like PRR95                                                                                                                                                                                                                                                                                                                                                                                                                       | 0.39                  | Down-regulation                                    | Hypo-methylated genome D       | Transcribed                 |
| CONTIG70475_1-2644-366     | 519                      | GO:0005515<br>Bradi1g69350.1<br>Oryza brachyantha conserved oligomeric Golgi complex subunit 6-like                                                                                                                                                                                                                                                                                                                                                                                                                                   | 0.251                 | Down-regulation                                    | Hypo-methylated genome D       | Non-transcribed             |
| CONTIG125368_377-2245-335  | 391                      | GO:0005515<br>Bradi4g35300.2<br>Brachypodium distachyon C2 and GRAM domain-containing protein At1g03370-like                                                                                                                                                                                                                                                                                                                                                                                                                          | 0.363                 | Down-regulation                                    | Hyper-methylated genome D      | Transcribed                 |
| CONTIG1084855_1-982-10     | 91                       | Brachypodium distachyon cell division control protein 48 homolog B<br>ASF-1 binding site" in CaMV 35S promoter; ASF-1 binds to two TGACG motifs; Found in HBP-1 binding site of wheat histone H3 gene; TGACG motifs are found in many promoters and are involved in transcriptional activation of several genes by auxin and/or salicylic acid; Binding site of tobacco TGA1a; TGA1a and b show homology to CREB; TGA6 is a new member of the TGA family; Abiotic and biotic stress differentially stimulate "as-1 element" activity; | 0.654,0.298           | Up-regulation genome A<br>down-regulation genome D | Hypo-methylation genome AD     | Transcribed                 |
| CONTIG3738166_1-430-225    | 120<br>123<br>189<br>192 | Bradi5g16520.2<br>GTPase activity<br>Brachypodium distachyon RNA-binding protein 25                                                                                                                                                                                                                                                                                                                                                                                                                                                   | 0.391                 | Down-regulation                                    | Hyper-methylation genome A     | Non-transcribed             |
| CONTIG3871251_1-404-195    | 266                      | -Oryza brachyantha outer envelope protein 64                                                                                                                                                                                                                                                                                                                                                                                                                                                                                          | 0.65,0.647            | Up-regulation                                      | Hypo-methylation genome AD     | Transcribed                 |
| CONTIG01055_4511-5766-1087 | 1111                     | Bradi1g57700.1<br>lectin-like receptor kinase, putative, subfamily L-LEC<br>Prunus mume L-type lectin-domain containing receptor kinase IV.1-like                                                                                                                                                                                                                                                                                                                                                                                     | 0.687                 | Up-regulation                                      | Hypo-methylation genome A      | Transcribed                 |
| CONTIG143939_1-546-4       | 42                       | Bradi1g44440.1<br>GTPase activity                                                                                                                                                                                                                                                                                                                                                                                                                                                                                                     | 0.634                 | Up-regulation                                      | Hyper-methylation genome D     | Transcribed                 |
| CONTIG972406_1-1026-744    | 762                      | -                                                                                                                                                                                                                                                                                                                                                                                                                                                                                                                                     | 0.621,0.704,<br>0.821 | Up-regulation                                      | Hypo-methylation genome ABD    | Non-transcribed             |

**Table 11. Annotation of differentially methylated sites.** *Brachypodium* genes and GO annotations that have been associated with each of the contigs containing a differential methylation site ( $\geq 25\%$ ) between the 12°C and 27°C samples plus a PPLR (Probability of Positive Log Ratio) value for the sub-genome that was differentially methylated that deviated from the baseline 0.5 by  $\pm 20\%$ .

| GOID                          | Description                                                      | Level | P value | GOID                          | Description                                                                           | Level | P value |
|-------------------------------|------------------------------------------------------------------|-------|---------|-------------------------------|---------------------------------------------------------------------------------------|-------|---------|
| <b>Sub-Genome D Gain/Loss</b> |                                                                  |       |         | <b>Sub-Genome D Gain/Loss</b> |                                                                                       |       |         |
| GO:0016860                    | intramolecular oxidoreductase activity                           | 3     | 0.003   | GO:0000910                    | cytokinesis                                                                           | 5     | 0.042   |
| GO:0006164                    | purine nucleotide biosynthetic process                           | 9     | 0.004   | GO:0009045                    | xylose isomerase activity                                                             | 5     | 0.003   |
| GO:0009152                    | purine ribonucleotide biosynthetic process                       | 10    | 0.003   | GO:0016861                    | intramolecular oxidoreductase activity, interconverting aldoses and ketoses           | 4     | 0.011   |
| GO:0009165                    | nucleotide biosynthetic process                                  | 8     | 0.02    | GO:0003843                    | 1,3-beta-D-glucan synthase activity                                                   | 7     | 0.003   |
| GO:0009260                    | ribonucleotide biosynthetic process                              | 9     | 0.004   | GO:0000148                    | 1,3-beta-D-glucan synthase complex                                                    | 6     | 0.003   |
| GO:0046390                    | ribose phosphate biosynthetic process                            | 6     | 0.004   | GO:0005886                    | plasma membrane                                                                       | 4     | 0.007   |
| GO:0072522                    | purine-containing compound biosynthetic process                  | 5     | 0.004   | GO:0044459                    | plasma membrane part                                                                  | 5     | 0.005   |
| GO:1901293                    | nucleoside phosphate biosynthetic process                        | 7     | 0.027   | GO:0071944                    | cell periphery                                                                        | 3     | 0.007   |
| GO:0033925                    | mannosyl-glycoprotein endo-beta-N-acetylglucosaminidase activity | 5     | 0.009   | GO:0006074                    | (1->3)-beta-D-glucan metabolic process                                                | 8     | 0.003   |
| GO:0006200                    | ATP catabolic process                                            | 11    | 0.0001  | GO:0006075                    | (1->3)-beta-D-glucan biosynthetic process                                             | 10    | 0.003   |
| GO:0046034                    | ATP metabolic process                                            | 10    | 0.003   | GO:1901659                    | glycosyl compound biosynthetic process                                                | 4     | 0.014   |
| GO:0006754                    | ATP biosynthetic process                                         | 11    | 0.003   | GO:0008553                    | hydrogen-exporting ATPase activity, phosphorylative mechanism                         | 13    | 0.003   |
| GO:0009142                    | nucleoside triphosphate biosynthetic process                     | 8     | 0.003   | GO:0015662                    | ATPase activity, coupled to transmembrane movement of ions, phosphorylative mechanism | 12    | 0.011   |
| GO:0009145                    | purine nucleoside triphosphate biosynthetic process              | 9     | 0.003   | GO:0042451                    | purine nucleoside biosynthetic process                                                | 8     | 0.003   |
| GO:0009163                    | nucleoside biosynthetic process                                  | 7     | 0.014   | GO:0042455                    | ribonucleoside biosynthetic process                                                   | 8     | 0.014   |
| GO:0009201                    | ribonucleoside triphosphate biosynthetic process                 | 9     | 0.003   | GO:0046129                    | purine ribonucleoside biosynthetic process                                            | 9     | 0.003   |
| GO:0009206                    | purine ribonucleoside triphosphate biosynthetic process          | 10    | 0.003   |                               |                                                                                       |       |         |

**Table 12. GOTERM enrichment for differentially methylated sites between the sub-genome D of the 12°C sample and *Ae. tauschii*.** Detailing only hits with a p value below 0.05. This analysis was carried out using GOEAST<sup>5</sup> default parameters.

## **Supplementary notes**

### **1. Assessment of methylation conservation between sample replicates**

To assess methylation conservation at positions that were assayed across the three replicates: firstly, homoeologous SNPs were used to distinguish the 3 sub-genomes (Supplementary figure 3, additional file 1). These allow categorization of reads at a position as A, B or D genome-specific or otherwise bi-allelic SNPs allow categorization of reads at a position as A or BD, B or AD and D or AB genome-specific. This enabled the percentage methylation per sub-genome or sub-genome pair to be calculated and compared between sample replicates. For all analyzed cytosine sites, the software MethylKit<sup>2</sup> was used to assess differential methylation between the 12°C and 27°C sample replicates, for each genome/genome-pair, by calculating Pearson correlation coefficients (Supplementary figure 4, additional file 1); samples were highly similar with all comparisons yielding coefficients  $\geq 0.97$ . High methylation conservation was also demonstrated between the two conditions, although when methylation changes are summarized across all cytosine sites they are likely to be comparatively small as the majority of cytosines are thought to be unmethylated. As such, Methylkit was also implemented for a pairwise comparison of sample replicates using the Fisher exact test; across all positions the average standard deviation between replicates in the 12°C and 27°C samples was 1.96 and 1.85 and  $< 0.09\%$  residues were identified as differentially methylated between the sample replicates ( $P < 0.01$ ). These values indicate high conservation of methylation between replicate samples; moreover, any sites that were considered differentially methylated between replicates were excluded from sample-wise comparisons.

### **2. Investigating the uniformity of enrichment**

To assess if uniform enrichment was seen from all three of the wheat sub-genomes the 28,632 and 29,202 cytosine sites for the 12°C and 27°C samples respectively, where all three sub-genomes could each be identified at a depth of 5X or more, were analyzed and the percentage of reads per sub-genome were calculated; 33.3% for sub-genome A, 33.3% for sub-genome B and 33.4% for sub-genome D. Therefore, enrichment was largely unbiased between the three sub-genomes. To investigate if methylation state affected enrichment; at sites where only one of the A, B and D sub-genomes showed methylation the average depth of coverage of the methylated sub-genome across the dataset was calculated and compared to the average coverage of the other two non-methylated sub-genomes at each position. This analysis was conducted across the 2 samples. The mean and standard deviation of coverage per sub-genome in the non-methylated group (mean=56.6, SD=71.0) were compared to those of the methylated group (mean=70.7, SD=89.5). There was a large overlap in the datasets and no significant difference was found between them ( $p=0.8775$ , two-tailed t test). Therefore, we were able to conclude there was no bias towards enrichment of methylated or non-methylated DNA sequence.

Efficient enrichment of the three sub-genomes was seen in non-transcribed regions when homoeologous SNPs were available for genome discrimination. When it was possible to discriminate the three sub-genomes at a minimum depth of 5X, there was no apparent difference between the capture efficiency of transcribed and non-transcribed regions: In transcribed exon/intron regions, in the 12°C sample, the percentage of reads mapping to each of the A, B and D sub-genomes was 33.2%, 33.3% and 33.5% respectively; In un-transcribed regions the percentages were 34.0%, 33.3% and 32.7% respectively; both tend towards the average across all regions and thus to ~33% of reads mapping to each sub-genome A, B and D.

Of the 7,813,105 and 8,069,906 cytosines, that were identified in the 12°C and 27°C samples respectively (Supplementary figure 6, stage 2); 49% are in regions that are predicted to be non-transcribed i.e. not hitting intron/exon sequence. Such proportions are predictable considering that ~45% of the full 44Mb mapping reference is predicted to be non-transcribed. Conversely, when we identify homoeologous SNPs within the mapping reference 22% are predicted to be un-transcribed and following on from this similar proportions of un-transcribed residues are seen for the 318,452 and 324,227 analyzed cytosine residues for the 12°C and 27°C samples with ~20% un-transcribed i.e. residues that could be associated with these homoeologous SNPs.

The ~20% of the 318,452 and 324,227 analyzed residues for the 12°C and 27°C samples that were in non-transcribed regions (supplementary figure 5, Stage 4) is in line with the percentage of available non-transcribed homoeologous SNPs for sub-genome discrimination (~22%). However this proportion deviates significantly from the initial 44 Mb mapping reference where ~45% is un-transcribed; analysis of those sites that could be associated with homoeologous SNPs results in a skew towards analysis of sites in transcribed sequence as proportionally fewer homoeologous SNPs could be confidently identified in the non-transcribed regions. This most likely reflects the targeting of our 120-Mer probe sequences to transcribed sequence and as such we see the highest depth of coverage in these transcribed probe regions. Since the enriched sequencing reads were used to define homoeologous SNPs by mapping to the IWGSC reference sequence this may explain the bias towards homoeologous SNPs in transcribed sequence. While this effect is un-desirable, stifling the identification of homoeologous SNPs in non-transcribed regions, here its effect has been minimal. As such, ~1/5 of the final dataset of cytosine residues for analysis (Figure 6, Stage 4) are found in un-transcribed regions and have been successfully associated with homoeologous SNPs.

### **3. Transposon methylation state assessment through the analysis of off target sequence**

Over the 2 samples on average 31,939,028 (~20%) sequencing reads in each case were mapped to the reference sequence. It is estimated that ~63% of off target sequencing reads matched repetitive sequence. Sequencing data for the 12°C sample, that could not be mapped to the reference sequence and had been enriched but not bisulfite treated, was aligned to the wheat TREP database using BLASTN<sup>1</sup> (E-value less than 1e-5) to see if repetitive sequence could be

identified/categorized. This off-target sequence should be unbiased carryover DNA and equivalent to shotgun sequencing total wheat DNA at low coverage. To test this we compared the proportions of transposon types in the enriched data and found that they closely matched the proportions seen in previous shotgun sequence data<sup>3</sup> (see supplementary table 3). It is also possible that the transposon sample may be biased to transposons closely associated with genomic portions of the genome, to test this we investigated the proportion of paired end reads mapped to the extended bait reference sequence at one end of the pair and transposon sequence at the other; we identified only 1.35% of mapped reads with a paired end of this type.

The unmapped enriched bisulfite treated sequencing reads were also mapped to the Triticeae Repeat Sequence database (TREP) sequences using Bismark<sup>4</sup> to allow the study of transposon/repetitive DNA methylation. For each transposon type, mapped reads were analyzed across all of the cytosine residues, the percentage of mapped reads overall showing methylation was calculated. It was noted that transposons in general were hyper-methylated, 24% of reads showed methylation across all cytosine sites, in comparison to the same analysis of the mapped reads across the enriched gene rich regions where we see such methylation in ~12.3% of the reads. The retro transposon group SINE was the only exception to this where no methylation was seen, however this group gained less than 5X coverage and as such this may not be a reliable result.

#### **4. Conserved proportions of uni-genome and bi-genome methylation across the respective genomes/genome-pairs**

In the 12°C sample; 30.0% of uni-genome methylation was from sub-genome A, 37.1% from sub-genome B and 32.9% from sub-genome D. In the 27°C sample; 31.9% of the uni-genome methylation was from sub-genome A, 35.4% from sub-genome B and 32.7% from sub-genome D. In both cases the 3 percentages were found not to be significantly different to the expected percentage of 1/3 (Sample 12;  $X^2 = 3.847$ ,  $p = 0.1461$  and Sample 27;  $X^2 = 0.988$ ,  $p = 0.6103$ ). For these calculations residues were only used if all three sub-genomes could be identified independently each at a depth of 5X; this avoids bias for uni-genome methylation that could be introduced by using uneven proportions of biallelic homoeologous SNPs i.e. distinguishing genome A:BD, B:AD and D:AB. In the 12°C sample; 34.5% of bi-genome methylation was from sub-genomes B and D, 32.9% from sub-genomes A and D and 32.6% from sub-genomes A and B. In the 27°C sample; 35.5% of bi-genome methylation was from sub-genomes B and D, 31.8% from sub-genomes A and D and 32.7% from sub-genomes A and B. In both cases the 3 percentages were found not to be significantly different to the expected percentage of 1/3 (Sample 12;  $X^2 = 0.892$ ,  $p = 0.6403$  and Sample 27;  $X^2 = 0.275$ ,  $p = 0.8714$ ).

## **References**

1. Altschul, S. F., Gish, W., Miller, W., Myers, E. W. and Lipman, D. J. Basic local alignment search tool. *J. Mol. Biol.*, **215**, 403-410 (1990)
2. Akalin, A. *et al.* methylKit: a comprehensive R package for the analysis of genome-wide DNA methylation profiles. *Genome Biol* **13**, R87 (2012).
3. Brenchley, R. *et al.* Analysis of the bread wheat genome using whole-genome shotgun sequencing. *Nature*, **491**, 705-710 (2012)
4. Krueger, F. and Andrews, S. R. Bismark: a flexible aligner and methylation caller for Bisulfite-Seq applications. *Bioinformatics*, **27**, 11:1571-1572 (2011)
5. Zheng, Q. & Wang, X. J. GOEAST: a web-based software toolkit for Gene Ontology enrichment analysis. *Nucleic Acids Res* **36**, W358–W363 (2008).
